# Supplementary material for: Catalytic asymmetric conjugate addition of coumarins to unsaturated ketones catalyzed by a chiral-at-metal Rh(iii) complex
Source: Royal Society of Chemistry journal article supplement (doi:10.1039/d3cc04726a), 2023-11-24
Supplement: d3cc04726a1.pdf [file d3cc04726a1.pdf]

## Supporting Information

# Catalytic Asymmetric Conjugate Addition of Coumarins to Unsaturated Ketones

Xiangjie Chen<sup>a,+</sup>, Yujie Zhao<sup>a,+</sup>, Cheng Huang<sup>a</sup>, Zhifei Zhao<sup>a</sup>, Weiwei Zhao<sup>b\*</sup> and Shi-Wu Li<sup>a\*</sup>

<sup>a</sup>Key Laboratory for Green Processing of Chemical Engineering of Xinjiang Bingtuan, School of Chemistry and Chemical Engineering, Shihezi University, Xinjiang Uygur Autonomous Region 832000, People's Republic of China.

<sup>b</sup>College of Life Science & Technology, Tarim University, Alar, 843300, Xinjiang, People's Republic of China.

E-mail: lishiwu@shzu.edu.cn; n2550384692@163.com

+These authors contributed equally to this work.

## Table of Contents

|            |                                                    |           |
|------------|----------------------------------------------------|-----------|
| <b>I</b>   | <b>General Information .....</b>                   | <b>3</b>  |
| <b>II</b>  | <b>Optimization of Reaction Conditions .....</b>   | <b>4</b>  |
| <b>III</b> | <b>Experimental Section .....</b>                  | <b>5</b>  |
| <b>IV</b>  | <b>References .....</b>                            | <b>21</b> |
| <b>V</b>   | <b>NMR Spectrum.....</b>                           | <b>22</b> |
| <b>VI</b>  | <b>Chiral HPLC analysis trace.....</b>             | <b>48</b> |
| <b>VII</b> | <b>Single Crystal X-Ray Diffraction of 4g.....</b> | <b>73</b> |

## I General Information

All reactions were performed in Schlenk tubes at room temperature using oven-dried glassware. Commercially obtained reagents were used without further purification, unless otherwise noted. THF was obtained from solvent distillation machine (Vigor VSPS-5) and stored under argon over 4 Å molecular sieves. Toluene was freshly distilled before use over sodium and benzophenone. Dichloromethane (DCM) was distilled over CaH<sub>2</sub>. Methanol and Ethyl Alcohol were used without further purification. Reactions were monitored by TLC analysis and plates were visualized with short-wave UV light (254 nm). The <sup>1</sup>H NMR, <sup>13</sup>C NMR and <sup>19</sup>F NMR spectra were obtained in CDCl<sub>3</sub> using a Bruker-BioSpin AVANCE III HD NMR spectrometer at 400 MHz, 100 MHz and 376 MHz respectively. Chemical shifts are reported in parts per million (δ value) calibrated against the residual solvent peak. HPLC analyses of the compounds were done using chiralcel IA-IF columns and chiralcel IC, AD-H, AS-H, OJ-H and OD-H columns using hexane and isopropanol as eluent. High-resolution mass spectra were recorded on a Bruker Impact II UHR TOF LC/MS Mass Spectrometry.

## II Optimization of Reaction Conditions

**Table 1.** Optimization of the Reaction Conditions<sup>a</sup>

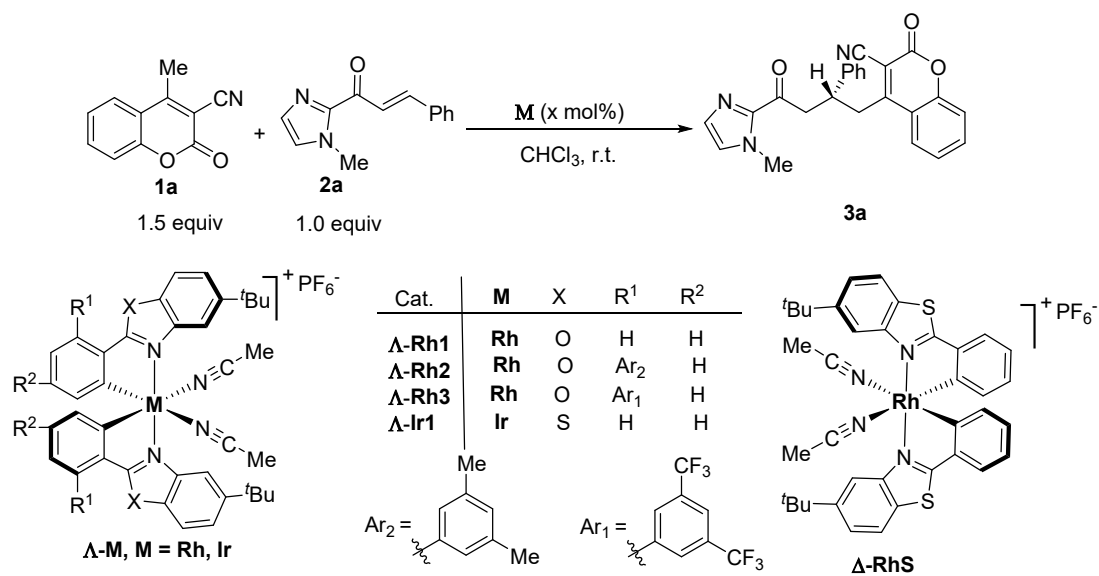

| Entry | M (x mol %)             | Solvent           | Time (d) <sup>d</sup> | Yield (%) <sup>b</sup> | E <sub>c</sub> (%) <sup>c</sup> |
|-------|-------------------------|-------------------|-----------------------|------------------------|---------------------------------|
| 1     | $\Delta\text{-Rh1}$ (2) | DCE               | 7 d                   | 20                     | 52                              |
| 2     | $\Delta\text{-Rh2}$ (2) | DCE               | 7 d                   | 18                     | 32                              |
| 3     | $\Delta\text{-Rh3}$ (2) | DCE               | 7 d                   | 35                     | 43                              |
| 4     | $\Delta\text{-Ir1}$ (2) | DCE               | 7 d                   | 12                     | 38                              |
| 5     | $\Delta\text{-RhS}$ (2) | DCE               | 7 d                   | 70                     | 72                              |
| 6     | $\Delta\text{-RhS}$ (0) | DCE               | 2 d                   | NR                     | /                               |
| 7     | $\Delta\text{-RhS}$ (2) | DCM               | 3 d                   | 65                     | 92                              |
| 8     | $\Delta\text{-RhS}$ (2) | MeOH              | 5 d                   | 76                     | 75                              |
| 9     | $\Delta\text{-RhS}$ (2) | THF               | 5 d                   | 26                     | 90                              |
| 10    | $\Delta\text{-RhS}$ (2) | MTBE              | 5 d                   | 20                     | 92                              |
| 11    | $\Delta\text{-RhS}$ (2) | Toluene           | 5 d                   | 33                     | 62                              |
| 12    | $\Delta\text{-RhS}$ (2) | CHCl <sub>3</sub> | 3 d                   | 86                     | 98                              |

|                 |                   |                   |     |    |    |
|-----------------|-------------------|-------------------|-----|----|----|
| 13              | $\Delta$ -RhS (1) | CHCl <sub>3</sub> | 5 d | 88 | 98 |
| 14 <sup>e</sup> | $\Delta$ -RhS (1) | CHCl <sub>3</sub> | 7 d | 85 | 98 |
| 15 <sup>f</sup> | $\Delta$ -RhS (1) | CHCl <sub>3</sub> | 5 d | 87 | 98 |

<sup>a</sup>Reaction conditions: **1a** (0.15 mmol), **2a** (0.10 mmol),  $\Delta$ -Rh/ $\Delta$ -RhS/  $\Delta$ -Ir1 (1-2 mol %), solvent (0.5 mL) at room temperature under Ar atmosphere. <sup>b</sup>Isolated yields. <sup>c</sup>Determined by chiral HPLC analysis on a chiral stationary phase. <sup>d</sup>d = days. <sup>e</sup>**1a:2a**= 1.0:1.0, **1a** (0.1 mmol), **2a** (0.1mmol). <sup>f</sup>**1a:2a**= 2:1, **1a** (0.2 mmol), **2a** (0.1 mmol).

### III Experimental Section

$\Delta$ -Rh was prepared according to reported procedure.<sup>1</sup>  $\alpha,\beta$ -unsaturated 2-acyl imidazoles were synthesized according to reported procedures.<sup>2-3</sup> All methylcoumarins **1** were prepared according to the literature procedure.<sup>4</sup>

#### General procedures for the preparation of substrates:

##### General procedure A for synthesis of 2-acetyl imidazoles.<sup>2-3</sup>

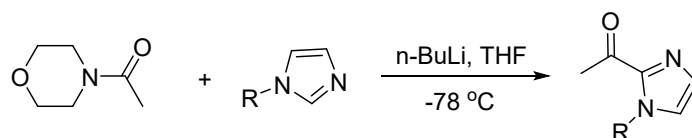

THF (60 mL) and 1-methylimidazole (4.4 mL, 55.2 mmol, 1.1 equiv) were added to a 250 mL Two-mouth round bottom flask and cooled to -78 °C. A solution of n-BuLi in hexanes (2.5 M, 34.1 mL, 85.3 mmol, 1.7 equiv) was added to the flask over 10 min. The solution was allowed to stir at -78 °C for 30 min. Then, the solution of 4-acetylmorpholine (6 mL, 50.1 mmol, 1.0 equiv) in THF(40 mL) was added to the flask over 10 min. After that, the mixture was stirred for 1 h at -78 °C. The solution was quenched with saturated NH<sub>4</sub>Cl (20 mL) , then saturated NaHCO<sub>3</sub> (20 mL) were added. The mixture was transferred to a separatory funnel, and the aqueous phase was extracted with ethyl acetate (3 x 50 mL). Combined the organic phase and washed with saturated NaCl (60 mL) . Finally, the organic phase was dried over sodium sulfate, filtered and concentrated on a rotatory evaporator. The resulting residue was purified by column chromatography on silica gel ( 200-300 mesh, EtOAc/Petroleum ether v/v = 1:3) to afford the desired product.

##### General procedure B for synthesis of $\alpha,\beta$ -unsaturated 2-acyl imidazoles.<sup>2-3</sup>

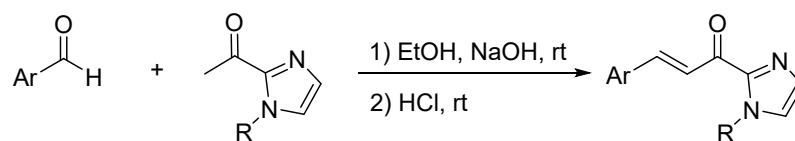

2-acetyl imidazoles (10.0 mmol, 1.0 equiv) and EtOH (20 mL) were added to a 50 mL round bottom flask followed by the desired aromatic aldehyde (10.5 mmol, 1.05 equiv) and NaOH (440 mg, 11 mmol, 1.1 equiv). The solution was stirred for 10-30 h, then dilute hydrochloric acid was added until the pH of solution was 7. The solution was transferred to a separatory funnel. H<sub>2</sub>O (10 mL) were added and the mixture was extracted with EtOAc (3 x 50 mL). Combined the organic phase and washed with saturated NaCl (50 mL). Finally, the organic extracts were dried over sodium sulfate, filtered, and concentrated on a rotatory evaporator. The resulting residue was purified by flash column chromatography on silica gel (200-300 mesh, EtOAc/Petroleum v 77:100 ether v/v = 1:5-1:2) to afford the desired product.

#### General procedure C for synthesis of 3-cyano-4-methylcoumarins.<sup>4</sup>

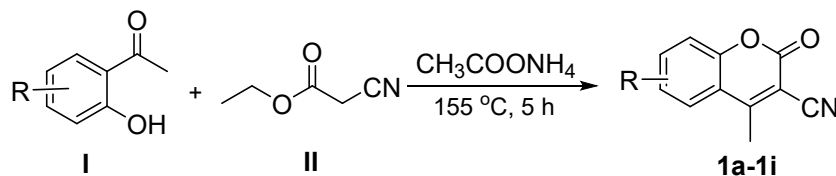

The mixture of **I** (10 mmol), **II** (15 mmol) and NH<sub>4</sub>OAc (25 mmol) was heated to 155 °C for 5 hour. Then, the mixture was cooled to room temperature, an appropriate amount of ethanol was added, and stirred overnight. The reaction mixture was filtered and evaporated under reduced pressure and purified by column chromatography (petroleum ether:EtOAc = 4:1) to give **1a-1i**.

#### General procedure for Catalytic Asymmetric Conjugate Addition of Coumarins to Unsaturated Ketones.

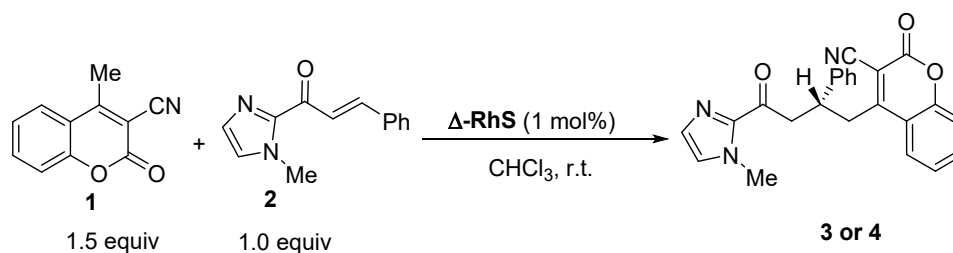

To an oven-dried 10 mL Schlenk tube equipped with a stir bar,  $\Delta$ -RhS (1 mol%) was added along with 3-cyano-4-methylcoumarins **1** (1.5 equiv, 0.15 mmol) and  $\alpha, \beta$ -unsaturated 2-acylimidazole **2** (1.0 equiv, 0.10 mmol) in  $\text{CHCl}_3$  (1.0 mL). The reaction was stirring in an oil bath at room temperature until consumption of the  $\beta$ -unsaturated 2-acylimidazole **2** (monitored by TLC). The solution was directly purified by silica gel column chromatography to afford **3** or **4**.

### General procedure for gram-scale experiments with lower catalyst loading.

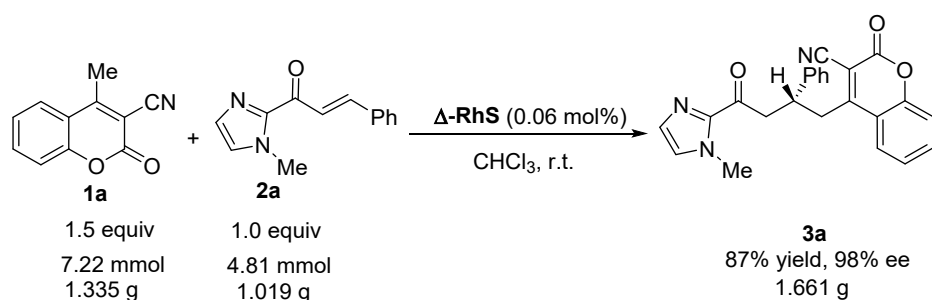

To an oven-dried 25 mL Schlenk tube equipped with a stir bar,  $\Delta$ -RhS (0.06 mol%) was added along with  $\alpha, \beta$ -unsaturated ketone **2a** (1.0 equiv, 4.81 mmol, 1.019 g) and 3-cyano-4-methylcoumarin **1a** (1.5 equiv, 7.22 mmol, 1.335 g) in  $\text{CHCl}_3$  (10.0 mL). The reaction was stirring at room temperature until consumption of the **2a** (monitored by TLC). The solution was directly purified by silica gel column chromatography (EtOAc/DCM = 1:20) to afford **3a** (white solid, 1.661 g, 87% yield, 98% ee).

### General Experimental Procedure for the Synthesis of Products **5a**.<sup>5</sup>

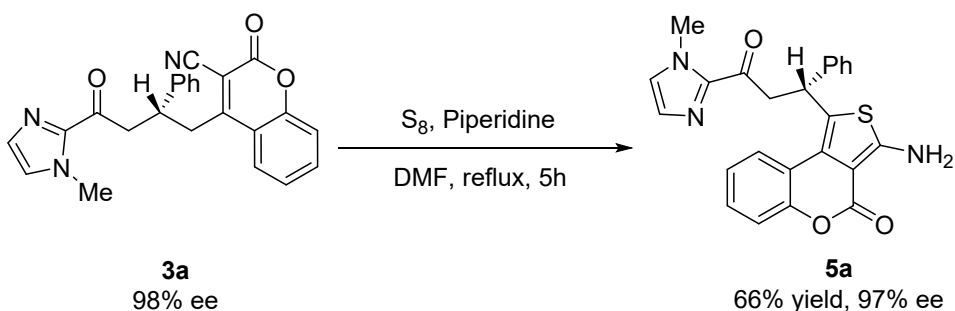

In an oven- and vacuum-dried seal tube, **3a** (39.8 mg, 0.1 mmol, 1 equiv), Sulfur (3.2 mg, 0.1 mmol, 1 equiv) and piperidine (3  $\mu\text{L}$ , 0.3 mmol, 3 equiv) were taken in 150  $\mu\text{L}$  of freshly distilled DMF. Next, the seal tube was purged with argon and was heated to reflux at 160  $^\circ\text{C}$  for 5 h. After cooling down to r.t., the reaction mixture was diluted with 2 mL water and 10 mL EtOAc. Subsequently the aqueous layer was extracted

with EtOAc(3 × 10 mL) and dried over Na<sub>2</sub>SO<sub>4</sub>. Then the solvent was removed under reduced pressure, and crude reaction mixture was purified through silica gel column chromatography (eluent: EtOAc/Petroleum ether = 1/2) to afford **5a** (white solid, 28.3 mg, 66% yield, 97% ee).

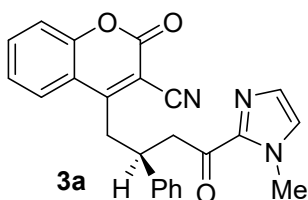

**4-(4-(1-methyl-1H-imidazol-2-yl)-4-oxo-2-phenylbutyl)-2-oxo-2H-chromene-3-carbonitrile (3a)**. White solid (35 mg, 88%). Mp: 185.5-186.8 °C.  $[\alpha]_D^{25} = +256$  (c = 0.5 in CH<sub>2</sub>Cl<sub>2</sub>). HPLC: 98% ee (Chiralpak AD-H, hexane/ isopropanol = 85:15, flow rate = 1.0 mL/min,  $\lambda = 250$  nm)  $t_R = 18.49$  min (major), 34.34 min (minor). <sup>1</sup>H NMR (400 MHz, CDCl<sub>3</sub>, 25 °C)  $\delta$ /ppm: 7.36 (d,  $J = 8$  Hz, 1H), 7.25-7.12 (m, 6H), 7.08 (s, 1H), 4.0 (s, 3H), 3.93-3.82 (m, 2H), 3.73-3.62 (m, 2H), 3.34-3.29 (m, 1H). <sup>13</sup>C NMR (100 MHz, CDCl<sub>3</sub>, 25 °C)  $\delta$ /ppm: 190.5, 164.1, 156.6, 153.4, 142.9, 142.7, 140.6, 134.9, 129.4, 128.8, 127.7, 127.7, 127.5, 126.9, 125.5, 117.7, 117.6, 113.3, 102.9, 44.9, 41.5, 43.2, 39.2, 36.2. HRMS (ESI)  $m/z$ : [M + H]<sup>+</sup> calcd for C<sub>24</sub>H<sub>19</sub>N<sub>3</sub>O<sub>3</sub>H<sup>+</sup>, 398.1499; found, 398.1494.

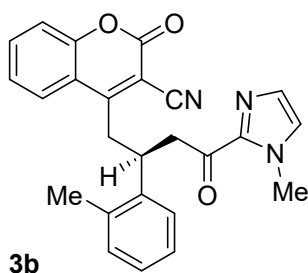

**4-(4-(1-methyl-1H-imidazol-2-yl)-4-oxo-2-(o-tolyl)butyl)-2-oxo-2H-chromene-3-carbonitrile (3b)**. White solid (35 mg, 85%). Mp: 145.5-156.8 °C.  $[\alpha]_D^{25} = +339.4$  (c = 0.5 in CH<sub>2</sub>Cl<sub>2</sub>). HPLC: 97% ee (Chiralpak AD-H, hexane/isopropanol = 85:15, flow rate = 1.0 mL/min,  $\lambda = 250$  nm)  $t_R = 14.91$  min (major), 25.48 min (minor). <sup>1</sup>H NMR (400 MHz, CDCl<sub>3</sub>, 25 °C)  $\delta$ /ppm: 81.0 (d,  $J = 8$  Hz, 1H), 7.60 (t,  $J = 7.6$  Hz, 1H), 7.44-7.35 (m, 2H), 7.25 (d,  $J = 8.4$  Hz, 1H), 7.15 (t,  $J = 7.2$  Hz, 1H), 7.06 (s, 1H), 7.00-6.97 (m, 2H), 6.88-6.87 (m, 1H), 4.20-4.12 (m, 1H), 3.89 (s, 3H), 3.76-3.70 (m, 1H), 3.57-3.48 (m, 2H), 3.33-3.27 (m, 1H), 1.83 (s, 3H). <sup>13</sup>C NMR (100 MHz,



$\text{CDCl}_3$ , 25 °C)  $\delta$ /ppm: 190.5, 164.0, 156.6, 153.3, 142.7, 139.3, 135.3, 135.0, 130.4, 129.4, 127.4, 127.3, 127.2, 127.0, 126.7, 125.5, 117.8, 117.7, 113.4, 102.9, 45.7, 38.7, 36.2, 29.7, 19.5. **HRMS (ESI)**  $m/z$ :  $[\text{M} + \text{H}]^+$  calcd for  $\text{C}_{25}\text{H}_{21}\text{N}_3\text{O}_3\text{H}^+$ , 412.1656; found, 412.1650.

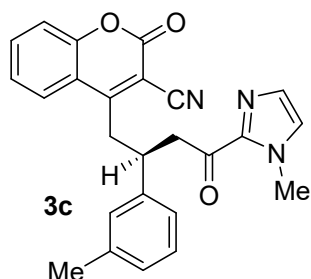

**4-(4-(1-methyl-1H-imidazol-2-yl)-4-oxo-2-(m-tolyl)butyl)-2-oxo-2H-chromene-3-carbonitrile (3c)**. White solid (39.9 mg, 97%). Mp: 140.5-146.8 °C.  $[\alpha]_D^{25} = +368.0$  ( $c = 0.5$  in  $\text{CH}_2\text{Cl}_2$ ). HPLC: 96% ee (Chiralpak AD-H, hexane/isopropanol = 85:15, flow rate = 1.0 mL/min,  $\lambda = 250$  nm)  $t_R = 15.55$  min (major), 26.95 min (minor).  **$^1\text{H}$  NMR (400 MHz,  $\text{CDCl}_3$ , 25 °C)**  $\delta$ /ppm: 81.0 (d,  $J = 8$  Hz, 1H), 7.60 (t,  $J = 7.6$  Hz, 1H), 7.44-7.35 (m, 2H), 7.25 (d,  $J = 8.4$  Hz, 1H), 7.15 (t,  $J = 7.2$  Hz, 1H), 7.05 (s, 1H), 7.00-6.97 (m, 2H), 6.88-6.86 (m, 1H), 4.20-4.12 (m, 1H), 3.89 (s, 3H), 3.76-3.70 (m, 1H), 3.57-3.48 (m, 2H), 3.33-3.27 (m, 1H), 1.83 (s, 3H).  **$^{13}\text{C}$  NMR (100 MHz,  $\text{CDCl}_3$ , 25 °C)**  $\delta$ /ppm: 190.5, 164.0, 156.6, 153.3, 142.7, 139.3, 135.3, 135.0, 130.4, 129.4, 127.4, 127.3, 127.2, 127.0, 126.7, 125.5, 117.8, 117.7, 113.4, 102.9, 45.7, 38.7, 36.2, 19.5. **HRMS (ESI)**  $m/z$ :  $[\text{M} + \text{H}]^+$  calcd for  $\text{C}_{25}\text{H}_{21}\text{N}_3\text{O}_3\text{H}^+$ , 412.1656; found, 416.1651.

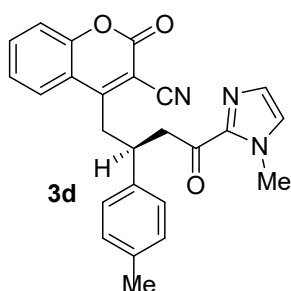

**4-(4-(1-methyl-1H-imidazol-2-yl)-4-oxo-2-(p-tolyl)butyl)-2-oxo-2H-chromene-3-carbonitrile (3d)**. White solid (40.7 mg, 99%). Mp: 160.5-166.8 °C.  $[\alpha]_D^{25} = +328.6$  ( $c = 0.5$  in  $\text{CH}_2\text{Cl}_2$ ). HPLC: 96% ee (Chiralpak AD-H, hexane/isopropanol = 85:15, flow rate = 1.0 mL/min,  $\lambda = 250$  nm)  $t_R = 19.54$  min (major), 49.64 min (minor).  **$^1\text{H}$  NMR**

(400 MHz, CDCl<sub>3</sub>, 25 °C)  $\delta$ /ppm: 81.3 (d,  $J$  = 10.0 Hz, 1H), 7.61 (t,  $J$  = 7.6 Hz, 1H), 7.39 (t,  $J$  = 7.6 Hz, 1H), 7.27 (d,  $J$  = 8.4 Hz, 1H), 7.07 (s, 1H), 6.98-6.90 (m, 5H), 3.91 (s, 3H), 3.82-3.70 (m, 2H), 3.59-3.50 (m, 2H), 3.23-3.18 (m, 1H), 2.18 (s, 3H). <sup>13</sup>C NMR (100 MHz, CDCl<sub>3</sub>, 25 °C)  $\delta$ /ppm: 190.6, 164.2, 156.7, 153.4, 142.8, 137.5, 137.2, 134.9, 129.5, 127.5, 127.4, 127.0, 125.5, 117.7, 117.6, 113.4, 102.9, 45.1, 41.2, 39.3, 36.2, 21.1. HRMS (ESI)  $m/z$ : [M + H]<sup>+</sup> calcd for C<sub>25</sub>H<sub>21</sub>N<sub>3</sub>O<sub>3</sub>H<sup>+</sup>, 412.1656; found, 412.1650.

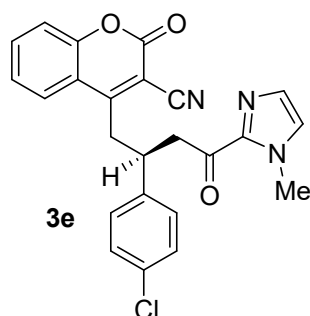

**4-(2-(4-chlorophenyl)-4-(1-methyl-1H-imidazol-2-yl)-4-oxobutyl)-2-oxo-2H-chromene-3-carbonitrile (3e).** White solid (39.7 mg, 92%). Mp: 165.5-171.8 °C.  $[\alpha]_D^{25}$  = +251.6 (c = 0.5 in CH<sub>2</sub>Cl<sub>2</sub>). HPLC: 98% ee (Chiralpak AD-H, hexane/isopropanol = 85:15, flow rate = 1.0 mL/min,  $\lambda$  = 250 nm)  $t_R$  = 24.55 min (major), 51.96 min (minor). <sup>1</sup>H NMR (400 MHz, CDCl<sub>3</sub>, 25 °C)  $\delta$ /ppm: 81.8 (d,  $J$  = 7.6 Hz, 1H), 7.72 (t,  $J$  = 8.0 Hz, 1H), 7.49 (t,  $J$  = 7.6 Hz, 1H), 7.39 (d,  $J$  = 8.0 Hz, 1H), 7.24-7.19 (m, 3H), 7.12-7.09 (m, 3H), 4.01 (s, 3H), 3.87-3.81 (m, 2H), 3.73-3.61 (m, 2H), 3.35-3.30 (m, 1H). <sup>13</sup>C NMR (100 MHz, CDCl<sub>3</sub>, 25 °C)  $\delta$ /ppm: 190.0, 163.7, 156.5, 153.5, 142.6, 139.0, 135.0, 133.5, 129.4, 129.0, 127.5, 126.7, 125.6, 117.8, 117.4, 113.3, 103.1, 44.9, 41.0, 38.9, 36.2. HRMS (ESI)  $m/z$ : [M + H]<sup>+</sup> calcd for C<sub>24</sub>H<sub>18</sub>ClN<sub>3</sub>O<sub>3</sub> H<sup>+</sup>, 432.1110; found 432.1101 and 434.1066.

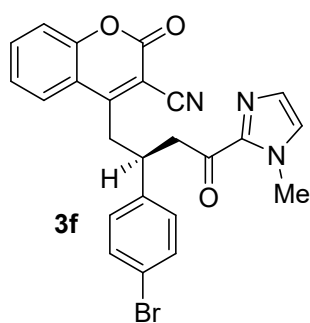

**4-(2-(4-bromophenyl)-4-(1-methyl-1H-imidazol-2-yl)-4-oxobutyl)-2-oxo-2H-chromene-3-carbonitrile (3f).** White solid (47.1 mg, 99%). Mp: 180.3-186.5 °C.

$[\alpha]_D^{25} = +397.2$  ( $c = 0.5$  in  $\text{CH}_2\text{Cl}_2$ ). HPLC: 97% ee (Chiralpak AD-H, hexane/isopropanol = 85:15, flow rate = 1.0 mL/min,  $\lambda = 250$  nm)  $t_R = 30.91$  min (major), 65.56 min (minor).  $^1\text{H NMR}$  (400 MHz,  $\text{CDCl}_3$ , 25 °C)  $\delta$ /ppm: 8.10 (d,  $J = 4.4$  Hz, 1H), 7.65-7.61 (m, 1H), 7.41 (t,  $J = 8.0$  Hz, 1H), 7.30-7.29 (m, 3H), 7.07-6.94 (m, 4H), 3.91 (s, 3H), 3.76-3.71 (m, 2H), 3.61-3.51 (m, 2H), 3.54-3.19 (m, 1H).  $^{13}\text{C NMR}$  (100 MHz,  $\text{CDCl}_3$ , 25 °C)  $\delta$ /ppm: 190.0, 163.7, 156.5, 153.4, 142.6, 139.7, 135.1, 131.9, 129.5, 129.4, 127.6, 126.8, 125.6, 117.8, 117.4, 113.3, 103.0, 44.8, 41.0, 38.8, 36.2. **HRMS (ESI)  $m/z$ :**  $[\text{M} + \text{H}]^+$  calcd for  $\text{C}_{24}\text{H}_{18}\text{BrN}_3\text{O}_3 \text{H}^+$ , 476.0604; found 476.0596 and 478.0578.

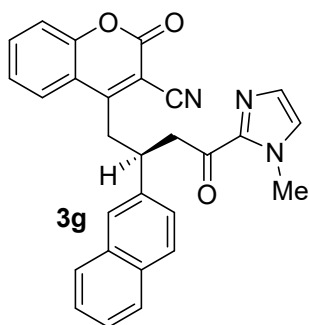

**4-(4-(1-methyl-1H-imidazol-2-yl)-2-(naphthalen-2-yl)-4-oxobutyl)-2-oxo-2H-chromene-3-carbonitrile (3g).** White solid (38.9 mg, 87%). Mp: 185.2-195.4 °C.  $[\alpha]_D^{25} = +350.0$  ( $c = 0.5$  in  $\text{CH}_2\text{Cl}_2$ ). HPLC: 98% ee (Chiralpak OD-H, hexane/isopropanol = 70:30, flow rate = 1.0 mL/min,  $\lambda = 250$  nm)  $t_R = 10.13$  min (major), 12.69 min (minor).  $^1\text{H NMR}$  (400 MHz,  $\text{CDCl}_3$ , 25 °C)  $\delta$ /ppm:  $^1\text{H NMR}$  (400 MHz,  $\text{CDCl}_3$ , 25 °C)  $\delta$ /ppm: 8.14 (d,  $J = 4.4$  Hz, 1H), 7.69-7.61 (m, 1H), 7.58-7.54 (m, 1H), 7.45-7.34 (m, 1H), 7.24-7.20 (m, 1H), 7.16-7.14 (m, 1H), 7.06-7.03 (m, 1H), 6.95 (s, 3H), 4.80 (s, 1H), 4.00-3.93 (m, 2H), 3.86 (s, 3H), 3.69-3.65 (m, 2H), 3.38-3.27 (m, 1H).  $^{13}\text{C NMR}$  (100 MHz,  $\text{CDCl}_3$ , 25 °C)  $\delta$ /ppm: 190.5, 163.8, 156.4, 153.2, 142.7, 137.4, 134.9, 131.3, 129.5, 129.1, 128.0, 127.5, 126.6, 125.9, 125.8, 125.5, 125.5, 125.2, 121.8, 117.9, 117.5, 113.3, 102.8, 54.9, 45.6, 39.4, 36.2, 34.3. **HRMS (ESI)  $m/z$ :**  $[\text{M} + \text{H}]^+$  calcd for  $\text{C}_{28}\text{H}_{21}\text{N}_3\text{O}_3 \text{H}^+$ , 448.1656; found, 448.1649.

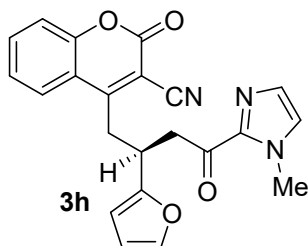

**4-(2-(furan-2-yl)-4-(1-methyl-1H-imidazol-2-yl)-4-oxobutyl)-2-oxo-2H-chromene-3-carbonitrile (3h).** White solid (31.0 mg, 80%). Mp: 175.2-183.5 °C.  $[\alpha]_D^{25} = +173.4$  (c = 0.5 in CH<sub>2</sub>Cl<sub>2</sub>). HPLC: 99% ee (Chiralpak AD-H, hexane/isopropanol = 85:15, flow rate = 1.0 mL/min,  $\lambda = 250$  nm)  $t_R = 43.8$  min (major), 72.77 min (minor). <sup>1</sup>H NMR (400 MHz, CDCl<sub>3</sub>, 25 °C)  $\delta$ /ppm: 8.02 (d,  $J = 8.0$  Hz, 1H), 7.63-7.59 (m, 1H), 7.37 (t,  $J = 7.6$  Hz, 1H), 7.30-7.28 (m, 1H), 7.22-7.20 (m, 1H), 7.09-7.01 (m, 2H), 6.12-6.11 (m, 1H), 5.88 (d,  $J = 3.2$  Hz, 1H), 3.94 (s, 3H), 3.86-3.82 (m, 1H), 3.78-3.60 (m, 2H), 3.48-3.44 (m, 1H), 3.32-3.27 (m, 1H). <sup>13</sup>C NMR (100 MHz, CDCl<sub>3</sub>, 25 °C)  $\delta$ /ppm: 189.9, 163.7, 156.7, 153.5, 153.4, 142.6, 142.1, 134.9, 129.5, 127.5, 126.6, 125.5, 117.6, 117.6, 112.8, 110.4, 107.0, 103.0, 42.9, 37.0, 36.2, 35.0. HRMS (ESI)  $m/z$ : [M + H]<sup>+</sup> calcd for C<sub>22</sub>H<sub>17</sub>N<sub>3</sub>O<sub>4</sub>H<sup>+</sup>, 388.1292; found, 388.1287.

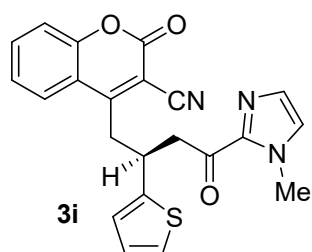

**4-(4-(1-methyl-1H-imidazol-2-yl)-4-oxo-2-(thiophen-2-yl)butyl)-2-oxo-2H-chromene-3-carbonitrile (3i).** White solid (35.1 mg, 87%). Mp: 185.2-195.4 °C.  $[\alpha]_D^{25} = +168.5$  (c = 0.5 in CH<sub>2</sub>Cl<sub>2</sub>). HPLC: 96% ee (Chiralpak OD-H, hexane/isopropanol = 90:10, flow rate = 1.0 mL/min,  $\lambda = 250$  nm)  $t_R = 35.19$  min (major), 40.09 min (minor). <sup>1</sup>H NMR (400 MHz, CDCl<sub>3</sub>, 25 °C)  $\delta$ /ppm: 8.06 (d,  $J = 8.0$  Hz, 1H), 7.64-7.60 (m, 1H), 7.40-7.37 (m, 1H), 7.31-7.29 (m, 1H), 7.10-7.01 (m, 1H), 6.80-6.72 (m, 2H), 4.12-4.05 (m, 1H), 3.94 (s, 3H), 3.86-3.80 (m, 1H), 3.71-3.65 (m, 1H), 3.58-3.54 (m, 1H), 3.27-3.21 (m, 1H). <sup>13</sup>C NMR (100 MHz, CDCl<sub>3</sub>, 25 °C)  $\delta$ /ppm: 189.8, 163.5, 156.6, 153.4, 143.6, 142.6, 134.9, 129.6, 127.6, 127.1, 126.7, 125.6, 117.7, 117.5, 113.1, 103.2, 45.9, 39.9, 36.6, 36.2. HRMS(ESI)  $m/z$ : [M + H]<sup>+</sup> calcd for C<sub>22</sub>H<sub>17</sub>N<sub>3</sub>O<sub>3</sub>SH<sup>+</sup>, 404.1063; found, 404.1057.

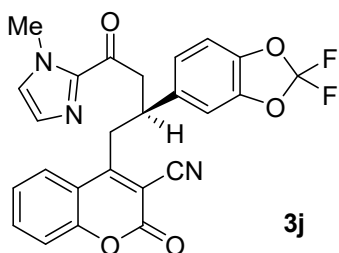

**3j**

**4-(2-(2,2-difluorobenzo[d][1,3]dioxol-5-yl)-4-(1-methyl-1H-imidazol-2-yl)-4-oxobutyl)-2-oxo-2H-chromene-3-carbonitrile(3j).** White solid (30.1 mg, 63%). Mp: 95.5-105.5 °C.  $[\alpha]_D^{25} = +313.2$  (c = 0.5 in CH<sub>2</sub>Cl<sub>2</sub>). HPLC: 98% ee (Chiralpak AD-H, hexane/isopropanol = 80:20, flow rate = 1.0 mL/min,  $\lambda = 250$  nm)  $t_R = 16.99$  min (major), 29.97 min (minor). <sup>1</sup>H NMR (400 MHz, CDCl<sub>3</sub>, 25 °C)  $\delta$ /ppm: 8.08 (d,  $J = 8.4$  Hz, 1H), 7.64 (t,  $J = 7.6$  Hz, 1H), 7.41 (t,  $J = 7.6$  Hz, 1H), 7.31-7.29 (m, 1H), 7.08-7.00 (m, 1H), 6.85-6.78 (m, 3H), 3.91 (s, 3H), 3.81-3.68 (m, 2H), 3.62-3.51 (m, 2H), 3.26-3.20 (m, 1H). <sup>13</sup>C NMR (100 MHz, CDCl<sub>3</sub>, 25 °C)  $\delta$ /ppm: 189.8, 163.5, 156.5, 153.5, 143.9, 143.0, 142.6, 136.9, 135.2, 134.1, 131.6 (t,  $J_{C-F} = 253.9$  Hz), 129.6, 129.0, 127.6, 126.6, 125.6, 123.0, 117.9, 117.4, 113.4, 109.6, 109.0, 103.1, 45.0, 41.4, 39.0, 36.2, 29.7. <sup>19</sup>F NMR (376 MHz, CDCl<sub>3</sub>, 25 °C)  $\delta$ /ppm: -49.86. HRMS (ESI)  $m/z$ :  $[M + H]^+$  calcd for C<sub>25</sub>H<sub>17</sub>F<sub>2</sub>N<sub>3</sub>O<sub>5</sub> H<sup>+</sup>, 478.1210; found, 478.1201.

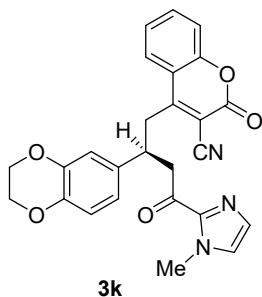

**3k**

**5-(2-(2,3-dihydrobenzo[b][1,4]dioxin-6-yl)-4-(1-methyl-1H-imidazol-2-yl)-4-oxobutyl)-2-oxo-2H-chromene-3-carbonitrile(3k).** White solid (38.2 mg, 84%). Mp: 198.2-202.5 °C.  $[\alpha]_D^{25} = +118.7$  (c = 0.5 in CH<sub>2</sub>Cl<sub>2</sub>). HPLC: 96% ee (Chiralpak OJ-H, hexane/isopropanol = 70:30, flow rate = 1.0 mL/min,  $\lambda = 250$  nm)  $t_R = 57.91$  min (major), 47.09 min (minor). <sup>1</sup>H NMR (400 MHz, CDCl<sub>3</sub>, 25 °C)  $\delta$ /ppm: 8.19 (d,  $J = 8.0$  Hz, 1H), 7.72-7.68 (m, 1H), 7.50-7.46 (m, 1H), 7.39-7.37 (m, 1H), 7.17-7.08 (m, 1H), 6.74-6.59 (m, 2H), 4.21 (s, 4H), 4.02 (s, 3H), 3.87-3.71 (m, 2H), 3.66-3.56 (m, 2H), 3.31-3.25 (m, 1H). <sup>13</sup>C NMR (100 MHz, CDCl<sub>3</sub>, 25 °C)  $\delta$ /ppm: 190.5, 164.1, 156.8, 153.4, 143.5, 142.9, 142.7, 134.8, 133.8, 129.4, 127.4, 126.9, 125.4, 120.5, 117.7, 117.6, 117.5, 116.5, 113.3, 103.0, 64.3, 45.2, 40.9, 39.3, 36.2. HRMS (ESI)

$m/z$ :  $[M + H]^+$  calcd for  $C_{26}H_{21}N_3O_3H^+$ , 456.1554; found, 456.1548.

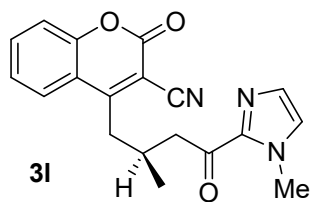

**4-(2-methyl-4-(1-methyl-1H-imidazol-2-yl)-4-oxobutyl)-2-oxo-2H-chromene-3-carbonitrile (3l)**. White solid (25.1 mg, 75%). Mp: 143.4-149.8 °C.  $[\alpha]_D^{25} = +186.2$  ( $c = 0.5$  in  $CH_2Cl_2$ ). HPLC: 98% ee (Chiralpak AD-H, hexane/isopropanol = 70:30, flow rate = 1.0 mL/min,  $\lambda = 250$  nm)  $t_R = 19.18$  min (major), 44.32 min (minor).  $^1H$  NMR (400 MHz,  $CDCl_3$ , 25 °C)  $\delta$ /ppm: 8.21 (d,  $J = 8.0$  Hz, 1H), 7.72-7.69 (m, 1H), 7.49-7.38 (m, 2H), 7.15-7.09 (m, 1H), 4.04 (s, 3H), 3.45-3.38 (m, 2H), 3.30-3.24 (m, 1H), 2.96-2.90 (m, 1H) 2.75-2.70 (m, 1H), 1.1 (d,  $J = 6.8$  Hz, 3H).  $^{13}C$  NMR (100 MHz,  $CDCl_3$ , 25 °C)  $\delta$ /ppm: 190.5, 164.1, 156.8, 153.4, 143.5, 142.9, 142.7, 134.8, 133.8, 129.4, 127.4, 126.9, 125.4, 120.5, 117.7, 117.6, 117.5, 116.5, 113.3, 103.0, 64.3, 45.2, 40.9, 39.3, 36.2. HRMS (ESI)  $m/z$ :  $[M + H]^+$  calcd for  $C_{19}H_{17}N_3O_3H^+$ , 336.1343; found, 336.1337.

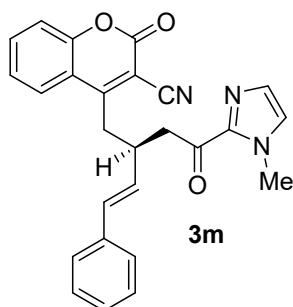

**(E)-4-(2-(2-(1-methyl-1H-imidazol-2-yl)-2-oxoethyl)-4-phenylbut-3-en-1-yl)-2-oxo-2H-chromene-3-carbonitrile(3m)**. White solid (25.4 mg, 67%). Mp: 161.0-168.0 °C.  $[\alpha]_D^{25} = +450.7$  ( $c = 0.5$  in  $CH_2Cl_2$ ). HPLC: 90% ee (Chiralpak AD-H, hexane/ isopropanol = 85:15, flow rate = 1.0 mL/min,  $\lambda = 250$  nm)  $t_R = 42.71$  min (major), 57.24 min (minor).  $^1H$  NMR (400 MHz,  $CDCl_3$ , 25 °C)  $\delta$ /ppm:  $^1H$  NMR (400 MHz,  $CDCl_3$ , 25 °C)  $\delta$ /ppm: 8.24 (d,  $J = 8.0$  Hz, 1H), 7.71 (t,  $J = 8.8$  Hz, 1H), 7.53-7.49 (m, 1H), 7.39-7.37 (m, 1H), 7.29-7.19 (m, 6H), 7.09 (s, 4H), 6.26-6.20 (m, 2H), 4.04 (s, 3H), 3.65-3.49 (m, 3H), 3.41 (s, 1H), 3.21-3.15 (m, 1H).  $^{13}C$  NMR (100 MHz,  $CDCl_3$ , 25 °C)  $\delta$ /ppm: 190.5, 164.3, 156.7, 153.6, 142.8, 136.2, 135.0, 132.3, 129.4, 129.3, 127.7, 127.5, 126.8, 126.4, 125.6, 117.8, 117.7, 113.8, 103.1, 44.6, 40.5, 37.4, 36.2. HRMS (ESI)  $m/z$ :  $[M + H]^+$  calcd for  $C_{26}H_{21}N_3O_3H^+$ , 424.1656; found,

424.1650.

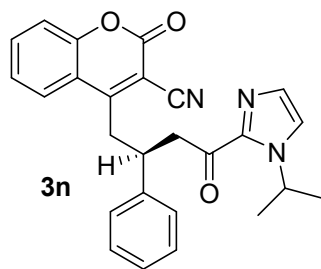

**4-(4-(1-isopropyl-1H-imidazol-2-yl)-4-oxo-2-phenylbutyl)-2-oxo-2H-chromene-3-carbonitrile(3n).** White solid (42.1 mg, 99%). Mp: 155.0-160.0 °C.  $[\alpha]_D^{25} = +283.7$  ( $c = 0.5$  in  $\text{CH}_2\text{Cl}_2$ ). HPLC: 96% ee (Chiralpak OD-H, hexane/isopropanol = 80:20, flow rate = 1.0 mL/min,  $\lambda = 250$  nm)  $t_R = 8.77$  min (major), 11.05 min (minor).  $^1\text{H NMR}$  (400 MHz,  $\text{CDCl}_3$ , 25 °C)  $\delta/\text{ppm}$ : 8.20 (d,  $J = 8.0$  Hz, 1H), 7.70 (t,  $J = 4.0$  Hz, 1H), 7.49 (t,  $J = 4.0$  Hz, 1H), 7.37-7.35 (m, 1H), 7.30-7.29 (m, 1H), 7.25-7.12 (m, 6H), 5.56-5.46 (m, 1H), 3.96-3.84 (m, 2H), 3.73-3.62 (m, 2H), 3.36-3.30 (m, 1H), 1.43 (q,  $J = 6.8$  Hz, 6H).  $^{13}\text{C NMR}$  (100 MHz,  $\text{CDCl}_3$ , 25 °C)  $\delta/\text{ppm}$ : 190.6, 164.1, 156.6, 153.4, 142.0, 140.6, 134.8, 129.9, 128.8, 127.7, 127.6, 126.9, 125.5, 117.7, 117.6, 113.3, 103.0, 49.3, 45.5, 41.7, 39.2, 23.6. **HRMS (ESI)**  $m/z$ :  $[\text{M} + \text{H}]^+$  calcd for  $\text{C}_{26}\text{H}_{23}\text{N}_3\text{O}_3\text{H}^+$ , 426.1812; found, 426.1805.

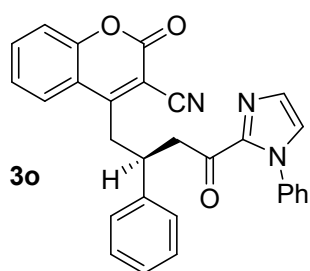

**2-oxo-4-(4-oxo-2-phenylbutyl)-2H-chromene-3-carbonitrile(3o).** White solid (45.5 mg, 99%). Mp: 111.0-118.0 °C.  $[\alpha]_D^{25} = +303.6$  ( $c = 0.5$  in  $\text{CH}_2\text{Cl}_2$ ). HPLC: 90% ee (Chiralpak AD-H, hexane/isopropanol = 85:15, flow rate = 1.0 mL/min,  $\lambda = 250$  nm)  $t_R = 26.57$  min (major), 45.36 min (minor).  $^1\text{H NMR}$  (400 MHz,  $\text{CDCl}_3$ , 25 °C)  $\delta/\text{ppm}$ : 7.92 (d,  $J = 8.0$  Hz, 1H), 7.56 (t,  $J = 7.6$  Hz, 1H), 7.37-7.35 (m, 3H), 7.31-7.20 (m, 3H), 7.10-7.02 (m, 8H), 3.80-3.64 (m, 3H), 3.51-3.47 (m, 1H), 3.26-3.20 (m, 1H).  $^{13}\text{C NMR}$  (100 MHz,  $\text{CDCl}_3$ , 25 °C)  $\delta/\text{ppm}$ : 189.0, 164.0, 156.6, 153.4, 142.7, 140.6, 138.1, 129.9, 129.1, 128.9, 128.8, 127.7, 127.7, 127.5, 126.8, 125.8, 125.5, 117.7, 117.5, 113.4, 103.0, 45.1, 41.5, 39.2. **HRMS (ESI)**

$m/z$ :  $[M + H]^+$  calcd for  $C_{29}H_{21}N_3O_3H^+$ , 460.1656; found, 460.1649.

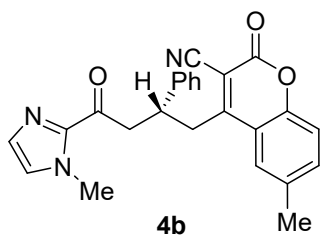

**6-methyl-4-(4-(1-methyl-1H-imidazol-2-yl)-4-oxo-2-phenylbutyl)-2-oxo-2H-chromene-3-carbonitrile(4b)**. White solid (31.2 mg, 76%). Mp: 141.0-148.0 °C.  $[\alpha]_D^{25} = +388.4$  ( $c = 0.5$  in  $CH_2Cl_2$ ). HPLC: 97% ee (Chiralpak AD-H, hexane/isopropanol = 85:15, flow rate = 1.0 mL/min,  $\lambda = 250$  nm)  $t_R = 16.67$  min (major), 30.53 min (minor).  $^1H$  NMR (400 MHz,  $CDCl_3$ , 25 °C)  $\delta$ /ppm: 7.80 (s, 1H), 7.39 (d,  $J = 8.4$  Hz, 1H), 7.19-7.10 (m, 6H), 7.07-7.05 (m, 1H), 6.98 (s, 1H), 3.92 (s, 3H), 3.86-3.73 (m, 2H), 3.64-3.59 (m, 1H), 3.52-3.48 (m, 1H), 3.26-3.20 (m, 1H), 2.41 (s, 3H).  $^{13}C$  NMR (100 MHz,  $CDCl_3$ , 25 °C)  $\delta$ /ppm: 190.5, 164.0, 156.9, 151.6, 142.8, 140.8, 135.9, 135.2, 129.4, 128.8, 128.4, 127.7, 127.4, 126.8, 126.6, 117.3, 117.3, 113.4, 102.8, 44.9, 41.6, 39.2, 36.2, 21.0. HRMS (ESI)  $m/z$ :  $[M + H]^+$  calcd for  $C_{25}H_{21}N_3O_3H^+$ , 412.1656; found, 412.1648.

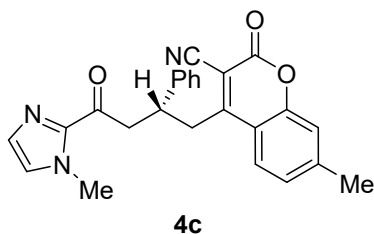

**6-methyl-4-(4-(1-methyl-1H-imidazol-2-yl)-4-oxo-2-phenylbutyl)-2-oxo-2H-chromene-3-carbonitrile(4c)**. White solid (32.1 mg, 78%). Mp: 155.0-158.0 °C.  $[\alpha]_D^{25} = +138.7$  ( $c = 0.5$  in  $CH_2Cl_2$ ). HPLC: 98% ee (Chiralpak AD-H, hexane/isopropanol = 85:15, flow rate = 1.0 mL/min,  $\lambda = 250$  nm)  $t_R = 16.94$  min (major), 29.58 min (minor).  $^1H$  NMR (400 MHz,  $CDCl_3$ , 25 °C)  $\delta$ /ppm: 7.95 (d,  $J = 8.0$  Hz, 1H), 7.20-7.11 (m, 6H), 7.08-7.05 (m, 2H), 6.98 (s, 1H), 3.91 (s, 3H), 3.81-3.72 (m, 2H), 3.63-3.49 (m, 2H), 3.25-3.19 (m, 1H), 2.43 (s, 3H).  $^{13}C$  NMR (100 MHz,  $CDCl_3$ , 25 °C)  $\delta$ /ppm: 190.5, 164.0, 157.0, 153.6, 142.7, 140.6, 129.4, 128.8, 127.6, 127.3, 126.8, 126.5, 117.8, 115.3, 113.5, 101.7, 44.9, 41.6, 39.1, 36.2, 22.0. HRMS (ESI)  $m/z$ :  $[M + H]^+$  calcd for  $C_{25}H_{21}N_3O_3H^+$ , 412.1656; found, 412.1650.



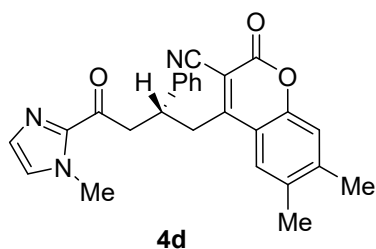

**6,7-dimethyl-4-(4-(1-methyl-1H-imidazol-2-yl)-4-oxo-2-phenylbutyl)-2-oxo-2H-chromene-3-carbonitrile (4d).** White solid (23.4 mg, 55%). Mp: 175.0-178.0 °C.  $[\alpha]_D^{25} = +178.7$  (c = 0.5 in CH<sub>2</sub>Cl<sub>2</sub>). HPLC: 82% ee (Chiralpak AD-H, hexane/isopropanol = 85:15, flow rate = 1.0 mL/min,  $\lambda = 250$  nm)  $t_R = 14.21$  min (major), 22.35 min (minor). <sup>1</sup>H NMR (400 MHz, CDCl<sub>3</sub>, 25 °C)  $\delta$ /ppm: 7.75 (s, 1H), 7.19-7.11 (m, 5H), 7.07-7.04 (m, 2H), 6.98 (s, 1H), 3.92 (s, 3H), 3.85-3.77 (m, 2H), 3.69-3.45 (m, 2H), 3.24-3.14 (m, 1H), 2.31 (s, 6H). <sup>13</sup>C NMR (100 MHz, CDCl<sub>3</sub>, 25 °C)  $\delta$ /ppm: 190.5, 164.0, 157.2, 151.9, 146.0, 142.8, 140.8, 134.5, 129.4, 128.7, 127.7, 127.6, 127.4, 126.8, 118.0, 115.3, 113.6, 101.4, 44.9, 41.6, 39.2, 36.2, 20.6, 19.5. **HRMS (ESI)  $m/z$ :** [M + H]<sup>+</sup> calcd for C<sub>26</sub>H<sub>23</sub>N<sub>3</sub>O<sub>3</sub>H<sup>+</sup>H<sup>+</sup>, 426.1812; found, 426.1805.

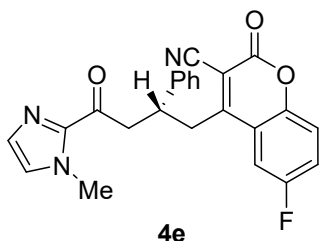

**6-fluoro-4-(4-(1-methyl-1H-imidazol-2-yl)-4-oxo-2-phenylbutyl)-2-oxo-2H-chromene-3-carbonitrile(4e).** White solid (34.0 mg, 82%). Mp: 158.0-167.0 °C.  $[\alpha]_D^{25} = +196.8$  (c = 0.5 in CH<sub>2</sub>Cl<sub>2</sub>). HPLC: 94% ee (Chiralpak AD-H, hexane/isopropanol = 85:15, flow rate = 1.0 mL/min,  $\lambda = 250$  nm)  $t_R = 21.53$  min (major), 41.02 min (minor). <sup>1</sup>H NMR (400 MHz, CDCl<sub>3</sub>, 25 °C)  $\delta$ /ppm: 8.14 (d,  $J = 0.8$  Hz, 1H), 7.55-7.53 (m, 1H), 7.24-7.13 (m, 4H), 7.10 (s, 1H), 7.05-7.00 (m, 1H), 3.95 (s, 3H), 3.87-3.80 (m, 1H), 3.75-3.68 (m, 1H), 3.62-3.48 (m, 2H), 3.24-3.18 (m, 1H). <sup>13</sup>C NMR (100 MHz, CDCl<sub>3</sub>, 25 °C)  $\delta$ /ppm: 190.2, 163.1 (d,  $J_{C-F} = 2.9$  Hz), 159.2 (d,  $J_{C-F} = 244.7$  Hz), 156.2, 149.6 (d,  $J_{C-F} = 1.9$  Hz), 142.7, 140.2, 129.5, 128.9, 127.9, 127.7, 127.5, 122.7 (d,  $J_{C-F} = 24.6$  Hz), 119.3 (d,  $J_{C-F} = 8.3$  Hz), 118.5 (d,  $J_{C-F} = 8.9$  Hz), 112.9, 112.7, (d,  $J_{C-F} = 25.4$  Hz), 104.0, 45.0, 41.4, 39.3, 36.2. <sup>19</sup>F NMR (376 MHz, CDCl<sub>3</sub>, 25 °C)  $\delta$ /ppm: -114.39. **HRMS (ESI)  $m/z$ :** [M + H]<sup>+</sup> calcd for

C<sub>24</sub>H<sub>18</sub>FN<sub>3</sub>O<sub>3</sub>H<sup>+</sup>, 416.1405; found, 416.1397.

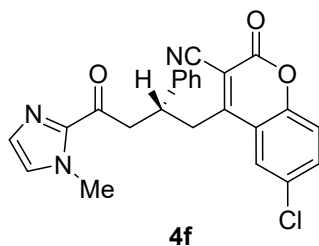

**6-chloro-4-(4-(1-methyl-1H-imidazol-2-yl)-4-oxo-2-phenylbutyl)-2-oxo-2H-chromene-3-carbonitrile(4f).** White solid (37.2 mg, 86%). Mp: 175.0-179.0 °C.  $[\alpha]_D^{25} = +166.0$  (c = 0.5 in CH<sub>2</sub>Cl<sub>2</sub>). HPLC: 96% ee (Chiralpak AD-H, hexane/isopropanol = 85:15, flow rate = 1.0 mL/min,  $\lambda = 250$  nm)  $t_R = 21.33$  min (major), 41.70 min (minor). <sup>1</sup>H NMR (400 MHz, CDCl<sub>3</sub>, 25 °C)  $\delta$ /ppm: 8.14 (d,  $J = 0.8$  Hz, 1H), 7.55-7.53 (m, 1H), 7.24-7.13 (m, 4H), 7.10 (s, 1H), 7.05-7.00 (m, 3H), 3.95 (s, 3H), 3.87-3.80 (m, 1H), 3.75-3.68 (m, 1H), 3.62-3.48 (m, 2H), 3.24-3.18 (m, 1H). <sup>13</sup>C NMR (100 MHz, CDCl<sub>3</sub>, 25 °C)  $\delta$ /ppm: 190.5, 163.0, 156.0, 151.7, 142.7, 140.3, 134.7, 131.1, 129.5, 129.0, 127.9, 127.7, 127.5, 126.5, 119.0, 118.6, 112.8, 103.9, 44.9, 41.6, 39.2, 36.2. HRMS (ESI)  $m/z$ : [M + H]<sup>+</sup> calcd for C<sub>24</sub>H<sub>18</sub>ClN<sub>3</sub>O<sub>3</sub>H<sup>+</sup>, 432.1110; found 432.1109 and 434.1063.

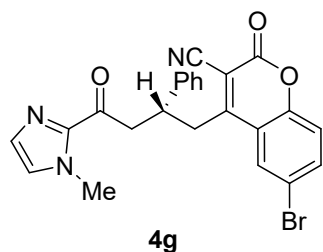

**6-bromo-4-(4-(1-methyl-1H-imidazol-2-yl)-4-oxo-2-phenylbutyl)-2-oxo-2H-chromene-3-carbonitrile(4g).** White solid (46.2 mg, 97%). Mp: 165.0-169.0 °C.  $[\alpha]_D^{25} = +277.4$  (c = 0.5 in CH<sub>2</sub>Cl<sub>2</sub>). HPLC: 94% ee (Chiralpak AD-H, hexane/isopropanol = 85:15, flow rate = 1.0 mL/min,  $\lambda = 250$  nm)  $t_R = 22.05$  min (major), 42.81 min (minor). <sup>1</sup>H NMR (400 MHz, CDCl<sub>3</sub>, 25 °C)  $\delta$ /ppm: 8.27 (d,  $J = 1.6$  Hz, 1H), 7.68-7.65 (m, 1H), 7.20-7.10 (m, 5H), 7.05-7.00 (m, 3H), 3.95 (s, 3H), 3.86-3.80 (m, 1H), 3.72-3.67 (m, 1H), 3.61-3.56 (m, 2H), 3.22-3.16 (m, 1H). <sup>13</sup>C NMR (100 MHz, CDCl<sub>3</sub>, 25 °C)  $\delta$ /ppm: 190.5, 163.0, 155.9, 152.2, 142.7, 140.3, 137.5, 129.5, 129.5, 128.9, 127.9, 127.7, 127.5, 119.3, 119.0, 118.4, 112.8, 103.8, 44.9, 41.6, 39.2, 36.2. HRMS (ESI)  $m/z$ : [M + H]<sup>+</sup> calcd for C<sub>24</sub>H<sub>18</sub>BrN<sub>3</sub>O<sub>3</sub>H<sup>+</sup>, 476.0604; found 476.0599 and 478.0576.

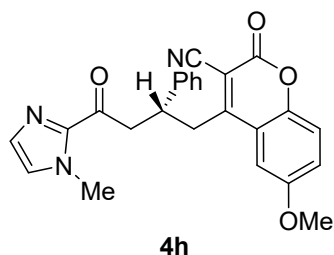

**6-methoxy-4-(4-(1-methyl-1H-imidazol-2-yl)-4-oxo-2-phenylbutyl)-2-oxo-2H-chromene-3-carbonitrile(4h).** White solid (26.0 mg, 61%). Mp: 173.0-178.0 °C.  $[\alpha]_D^{25} = +154.8$  (c = 0.5 in CH<sub>2</sub>Cl<sub>2</sub>). HPLC: 99% ee (Chiralpak AD-H, hexane/isopropanol = 85:15, flow rate = 1.0 mL/min,  $\lambda = 250$  nm)  $t_R = 18.97$  min (major), 31.19 min (minor). **<sup>1</sup>H NMR (400 MHz, CDCl<sub>3</sub>, 25 °C)**  $\delta$ /ppm: 7.73 (m, 1H), 7.23-7.14 (m, 6H), 7.05-7.01 (m, 3H), 3.98 (s, 3H), 3.95-3.90 (m, 4H), 3.81-3.74 (m, 1H), 3.58-3.51 (m, 2H), 3.23-3.14 (m, 1H). **<sup>13</sup>C NMR (100 MHz, CDCl<sub>3</sub>, 25 °C)**  $\delta$ /ppm: 190.9, 163.6, 156.9, 148.0, 142.7, 140.4, 129.5, 128.9, 127.8, 127.8, 127.4, 123.6, 118.7, 117.9, 113.3, 108.2, 103.1, 56.3, 45.1, 41.2, 39.4, 36.2, 1.0. **HRMS (ESI)  $m/z$ :** [M + H]<sup>+</sup> calcd for C<sub>25</sub>H<sub>21</sub>N<sub>3</sub>O<sub>4</sub>H<sup>+</sup>, 428.1605; found, 428.1600.

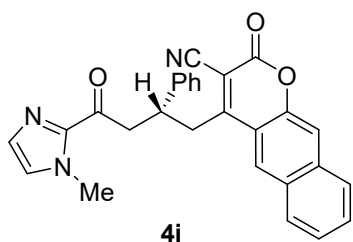

**3-(4-(1-methyl-1H-imidazol-2-yl)-4-oxo-2-phenylbutyl)-2-oxo-2H-benzo[g]chromene-3-carbonitrile (4i).** White solid (18.5 mg, 41%). Mp: 185.0-191.0 °C.  $[\alpha]_D^{25} = -70.0$  (c = 0.5 in CH<sub>2</sub>Cl<sub>2</sub>). HPLC: 93% ee (Chiralpak AD-H, hexane/isopropanol = 85:15, flow rate = 1.0 mL/min,  $\lambda = 250$  nm)  $t_R = 28.97$  min (major), 40.08 min (minor). **<sup>1</sup>H NMR (400 MHz, CDCl<sub>3</sub>, 25 °C)**  $\delta$ /ppm: 8.63 (d,  $J = 8.8$  Hz, 1H), 8.03 (d,  $J = 8.8$  Hz, 1H), 7.89 (d,  $J = 8.0$  Hz, 1H), 7.71 (t,  $J = 7.2$  Hz, 1H), 7.61-7.57 (m, 1H), 7.33-7.30 (m, 1H), 7.05-7.04 (m, 4H), 6.92-6.84 (m, 3H), 4.21-4.16 (m, 1H), 3.88-3.74 (m, 5H), 3.64-3.62 (m, 2H). **<sup>13</sup>C NMR (100 MHz, CDCl<sub>3</sub>, 25 °C)**  $\delta$ /ppm: 190.1, 176.2, 173.7, 169.7, 164.7, 156.6, 155.2, 143.9, 140.9, 137.3, 131.4, 130.1, 129.4, 129.4, 129.3, 127.4, 127.3, 127.2, 126.6, 125.3, 117.4, 112.9, 45.0, 43.3, 40.1, 36.1, 23.6. **HRMS (ESI)  $m/z$ :** [M + H]<sup>+</sup> calcd for C<sub>28</sub>H<sub>21</sub>N<sub>3</sub>O<sub>3</sub>H<sup>+</sup>, 448.1656; found, 448.1650.

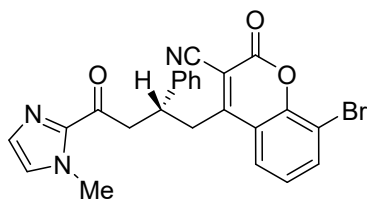

4j

**(R)-8-bromo-4-(4-(1-methyl-1H-imidazol-2-yl)-4-oxo-2-phenylbutyl)-2-oxo-2H-chromene-3-carbonitrile(4j).** White solid (39.54 mg, 83%). Mp: 168.0-170.3 °C.  $[\alpha]_D^{25} = +256.6$  (c = 0.5 in CH<sub>2</sub>Cl<sub>2</sub>). HPLC: 99% ee (Chiralpak AD-H, hexane/isopropanol = 80:20, flow rate = 1.0 mL/min,  $\lambda = 250$  nm)  $t_R = 38.59$  min (major), 17.99 min (minor). **<sup>1</sup>H NMR (400 MHz, CDCl<sub>3</sub>, 25 °C)**  $\delta$ /ppm: 8.23-8.21 (m, 1H), 7.92-7.90 (m, 1H), 7.36 (t,  $J = 8.0$  Hz, 1H), 7.24-7.20 (m, 3H), 7.16 (s, 1H), 7.12-7.08 (m, 3H), 4.0 (s, 3H), 3.95-3.88 (m, 1H), 3.84-3.77 (m, 1H), 3.67-3.60 (m, 2H), 3.33-3.72 (m, 1H). **<sup>13</sup>C NMR (100 MHz, CDCl<sub>3</sub>, 25 °C)**  $\delta$ /ppm: 190.5, 163.8, 155.5, 150.1, 142.7, 140.3, 130.3, 129.5, 128.9, 127.8, 127.7, 127.6, 126.3, 126.1, 118.9, 112.9, 112.3, 103.6, 44.9, 41.5, 39.2, 36.2. **HRMS (ESI)  $m/z$ : [M + H]<sup>+</sup>** calcd for C<sub>24</sub>H<sub>18</sub>BrN<sub>3</sub>O<sub>3</sub>H<sup>+</sup>, 476.0604; found, 476.0599. **HRMS (ESI)  $m/z$ : [M + H]<sup>+</sup>** calcd for C<sub>24</sub>H<sub>18</sub>BrN<sub>3</sub>O<sub>3</sub>H<sup>+</sup>, 476.0604; found 476.0596 and 478.0578.

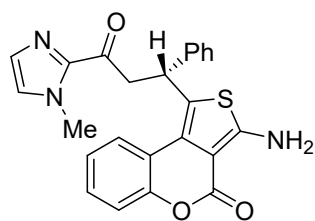

5a

**(R)-3-amino-1-(3-(1-methyl-1H-imidazol-2-yl)-3-oxo-1-phenylpropyl)-4H-thieno[3,4-c]chromen-4-one (5a).** Yellow solid (28.3 mg, 66%). Mp: 176.3-178.2 °C.  $[\alpha]_D^{25} = +270.9$  (c = 0.5 in CH<sub>2</sub>Cl<sub>2</sub>). HPLC: 97% ee (Chiralpak AD-H, hexane/isopropanol = 80:20, flow rate = 1.0 mL/min,  $\lambda = 250$  nm)  $t_R = 23.24$  min (major), 32.50 min (minor). **<sup>1</sup>H NMR (400 MHz, CDCl<sub>3</sub>, 25 °C)**  $\delta$ /ppm: 7.99-7.97 (m, 1H), 7.76 (s, 2H), 7.49 (s, 1H), 7.41-7.39 (m, 2H), 7.36-7.30 (m, 3H), 7.24-7.22 (m, 3H), 7.15 (d,  $J = 0.8$  Hz, 1H), 5.52 (t,  $J = 4.0$ , 1H), 3.83-3.81 (m, 5H). **<sup>13</sup>C NMR (100 MHz, CDCl<sub>3</sub>, 25 °C)**  $\delta$ /ppm: 189.2, 164.0, 159.4, 151.6, 143.0, 142.6, 129.5, 129.2, 128.9, 127.9, 127.4, 125.5, 124.7, 124.5, 121.4, 118.9, 117.8, 127.2, 98.8, 46.3, 36.0. **HRMS (ESI)  $m/z$ : [M + H]<sup>+</sup>** calcd for C<sub>24</sub>H<sub>19</sub>N<sub>3</sub>O<sub>3</sub>SH<sup>+</sup>, 429.1248; found, 429.1253.

## IV References

- (1) Wang, C.-Y.; Chen, L.-A.; Huo, H.-H.; Shen, X.-D.; Harms, K.; Gong, L.; Meggers, E. Asymmetric Lewis acid catalysis directed by octahedral rhodium centrochirality. *Chem. Sci.* **2015**, *6*, 1094-1100.
- (2) Myers, M. C.; Bharadwaj, A. R.; Milgram, B. C.; Scheidt, K. A. Catalytic Conjugate Additions of Carbonyl Anions under Neutral Aqueous Conditions. *J. Am. Chem. Soc.* **2005**, *127*, 14675-14680.
- (3) Lin, S.-X.; Sun, G.-J.; Kang, Q. Visible-Light-Activated Rhodium Complex in Enantioselective Conjugate Addition of  $\alpha$ -Amino Radicals with Michael Acceptors. *Chem. Commun.*, **2017**, *53*, 7665-7668.
- (4) (a) Kibou, Z.; Villemin, D.; Lohier, J.-F.; Cheikh, N.; Bar, N.; Choukhou-Braham, N. *Tetrahedron*, **2016**, *72*, 1653. (b) Levchenko, K. S.; Chudov, K. A.; Zinoviev, E. V.; Lyssenko, K. A.; Fakhrutdinov, A. N.; Demin, D. U.; Poroshin, N. O.; Zhukova, A. A.; Shmelin, P. S.; Grebennikov, E. P. *Mendeleev Commun.* **2019**, *29*, 301.
- (5) Sanjay, S.; Ravi, S.; Ravi, P. S. Enantioselective Distal Functionalization of 3-Cyano-4-methylcoumarins through Direct Vinylogous Conjugate Addition to Maleimides. *J. Org. Chem.* **2023**, *88*, 12, 7712–7723.



## V NMR Spectrum

### $^1\text{H}$ NMR 3a

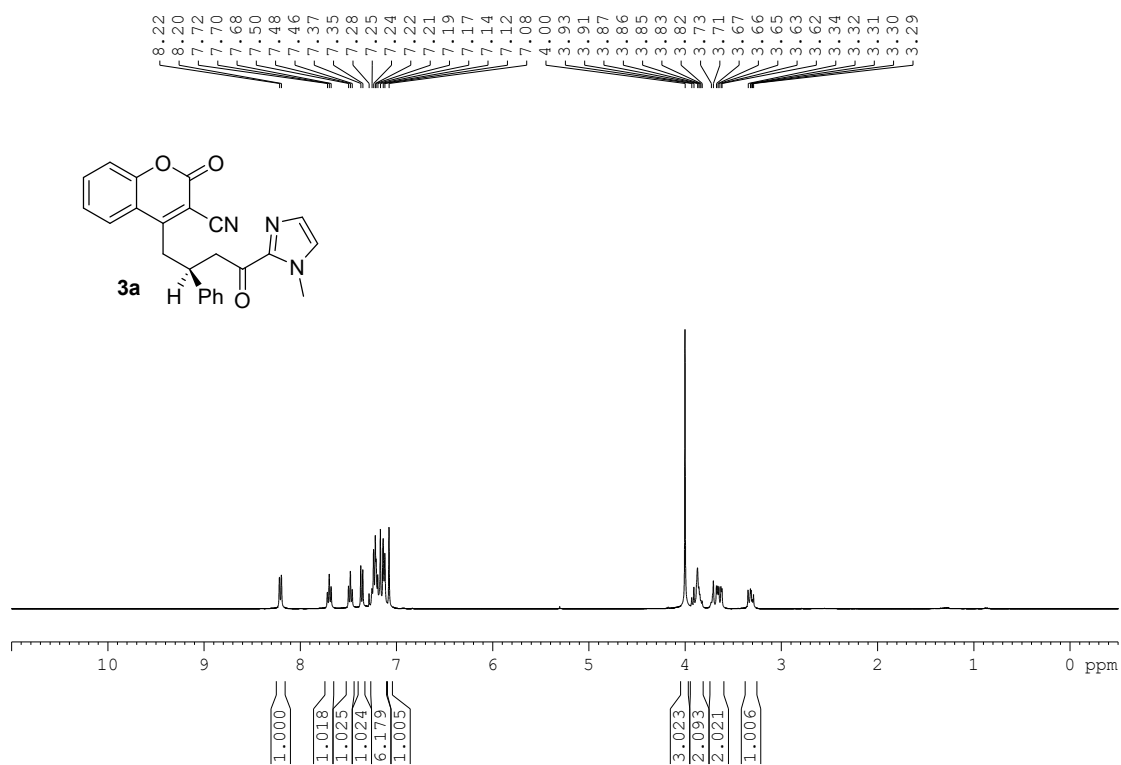

### $^{13}\text{C}$ NMR 3a

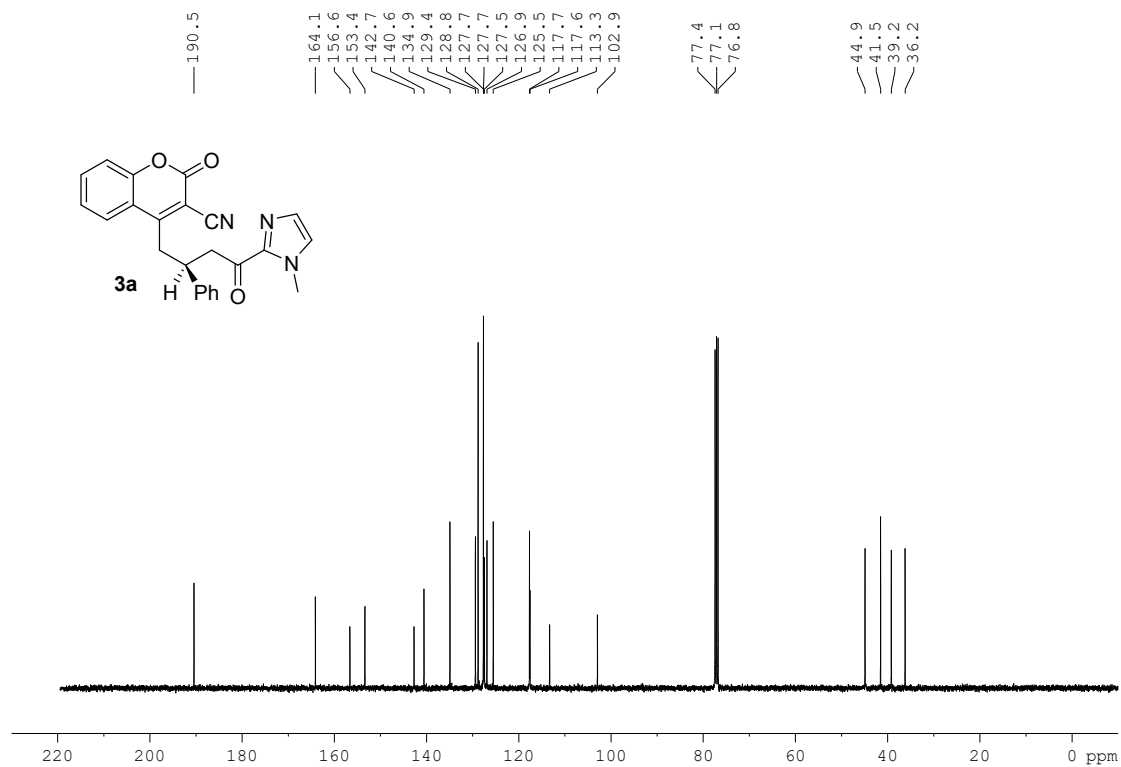

### <sup>1</sup>H NMR 3b

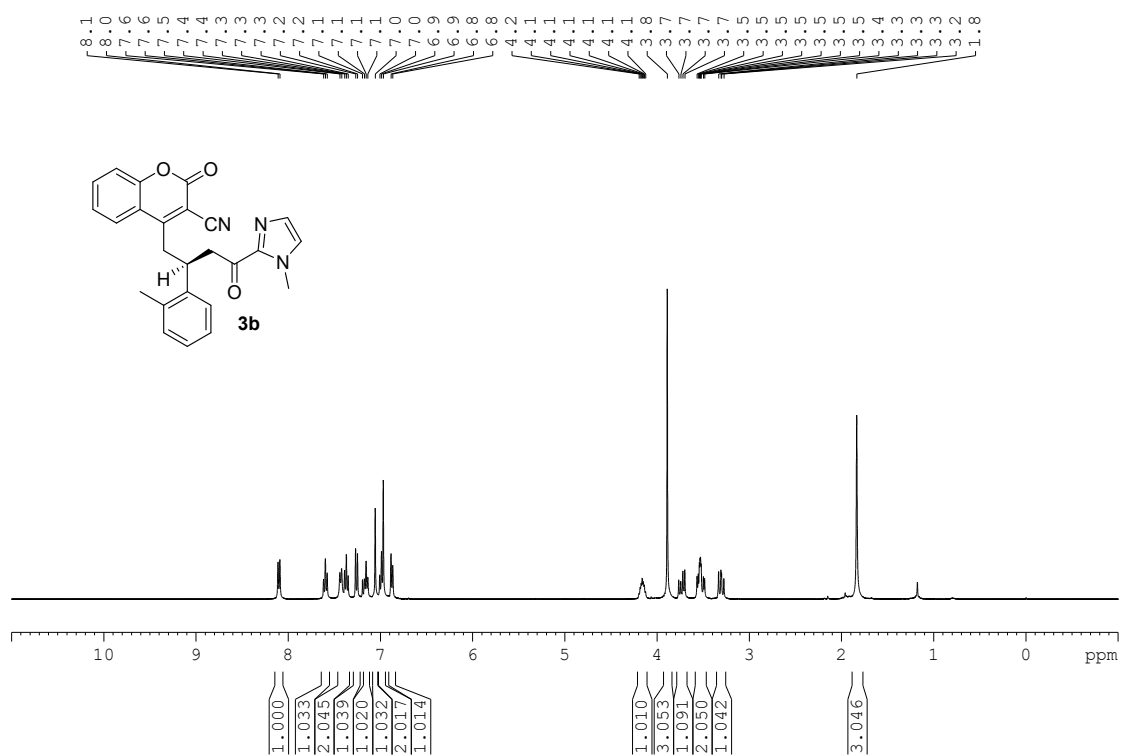

### <sup>13</sup>C NMR 3b

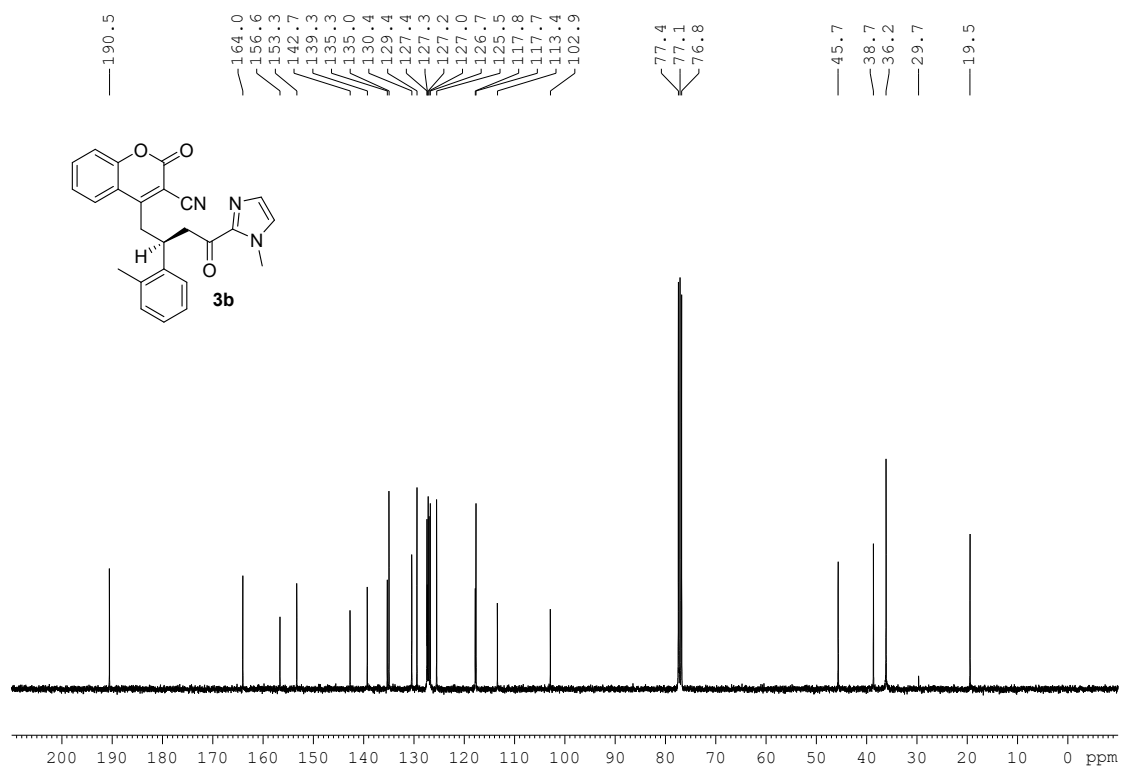



### <sup>1</sup>H NMR 3c

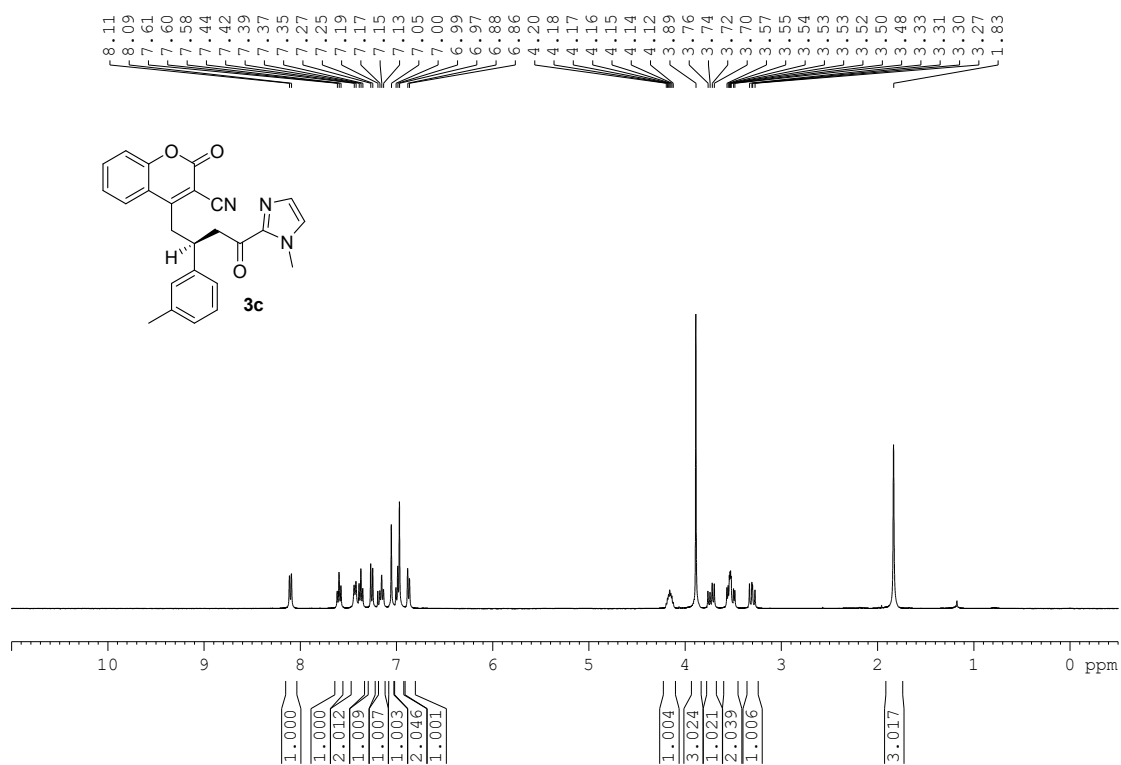

### <sup>13</sup>C NMR 3c

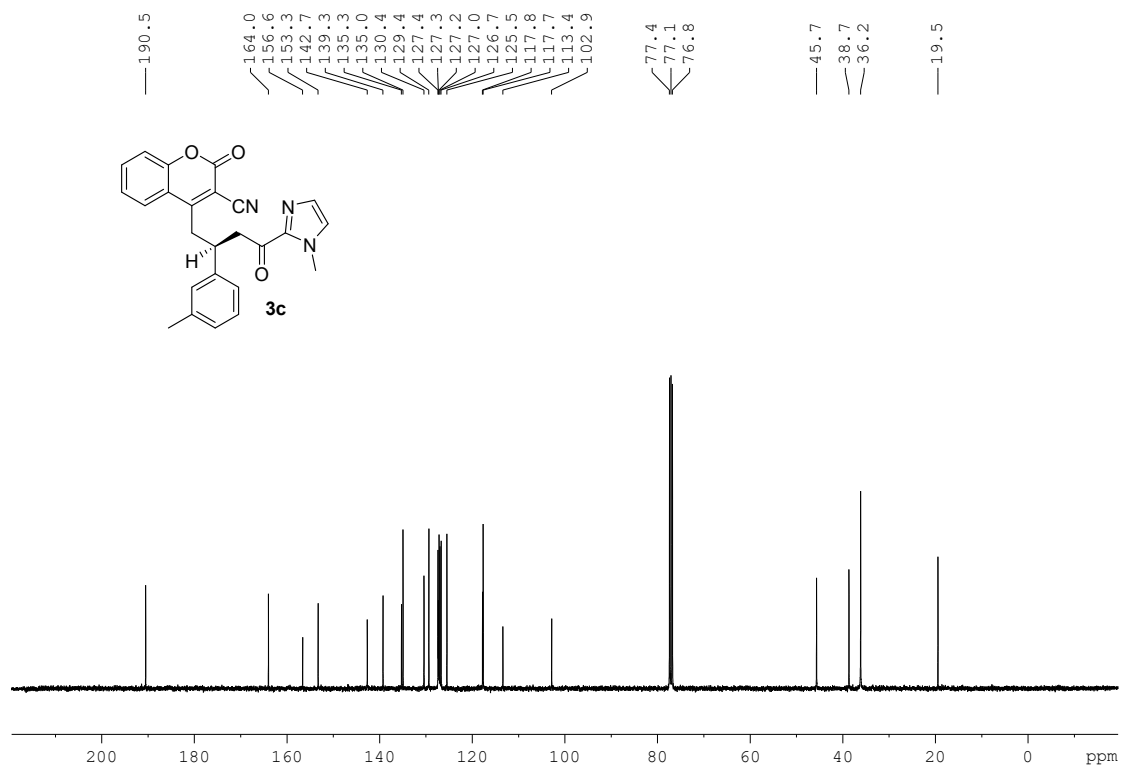

### <sup>1</sup>H NMR 3d

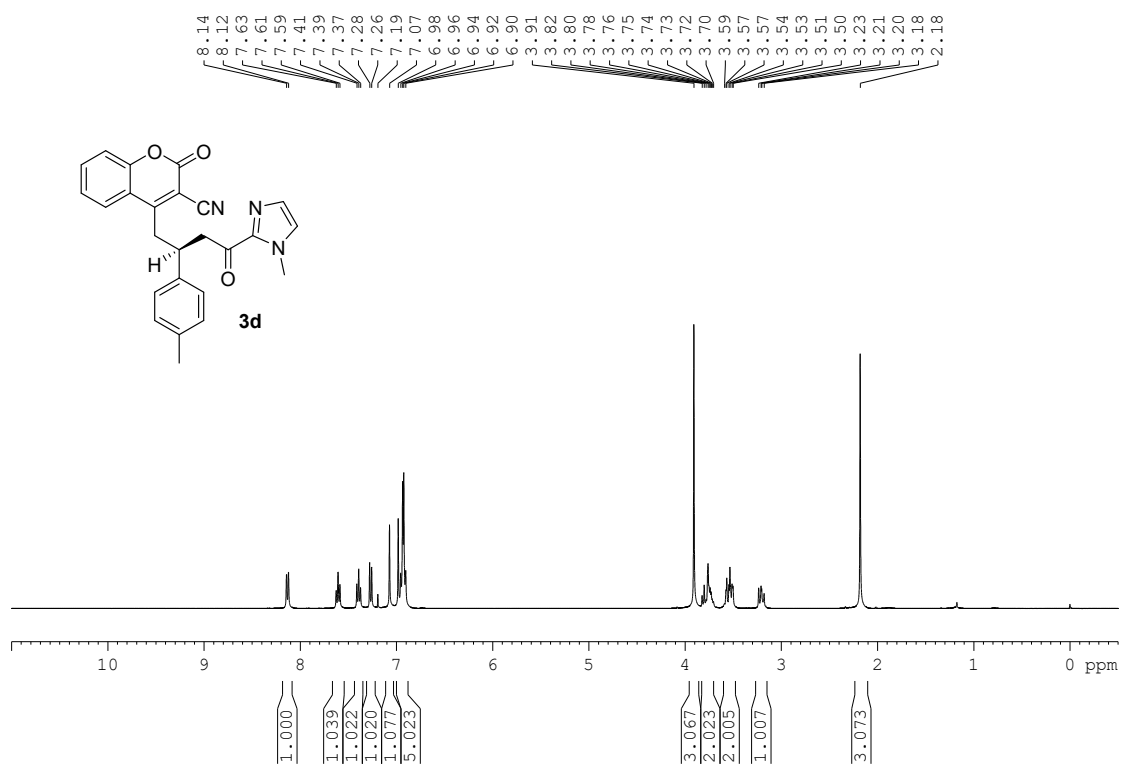

### <sup>13</sup>C NMR 3d

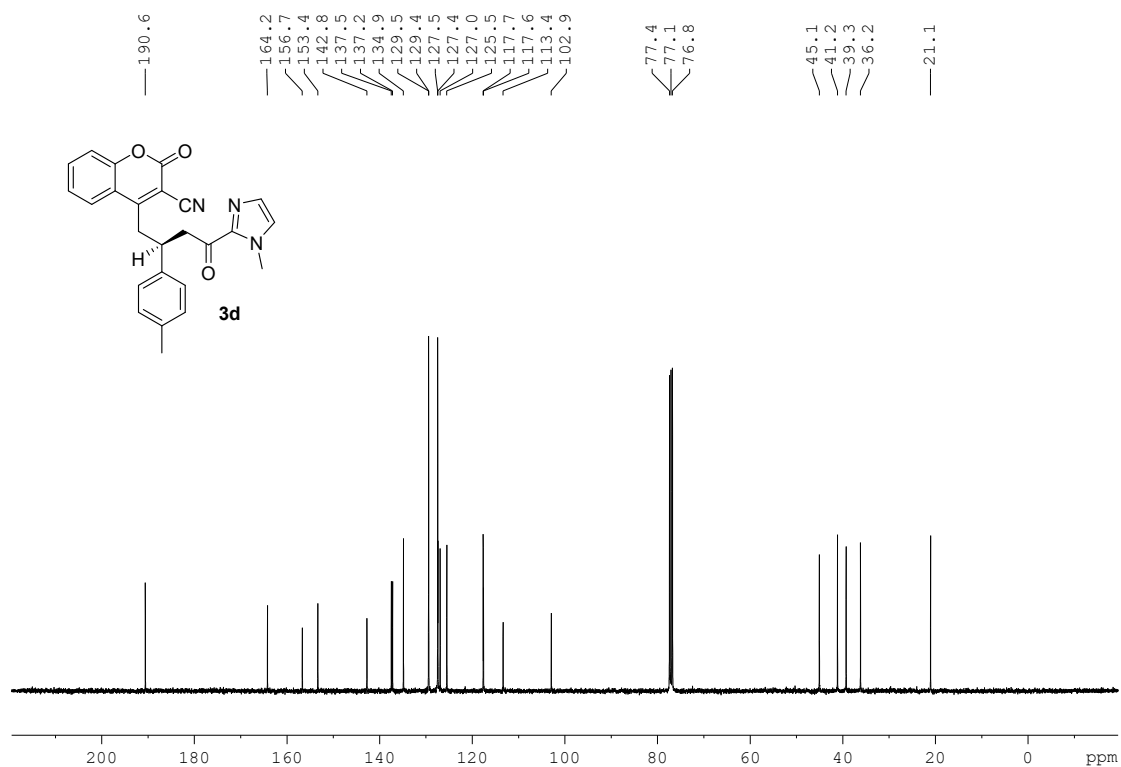

### <sup>1</sup>H NMR 3e

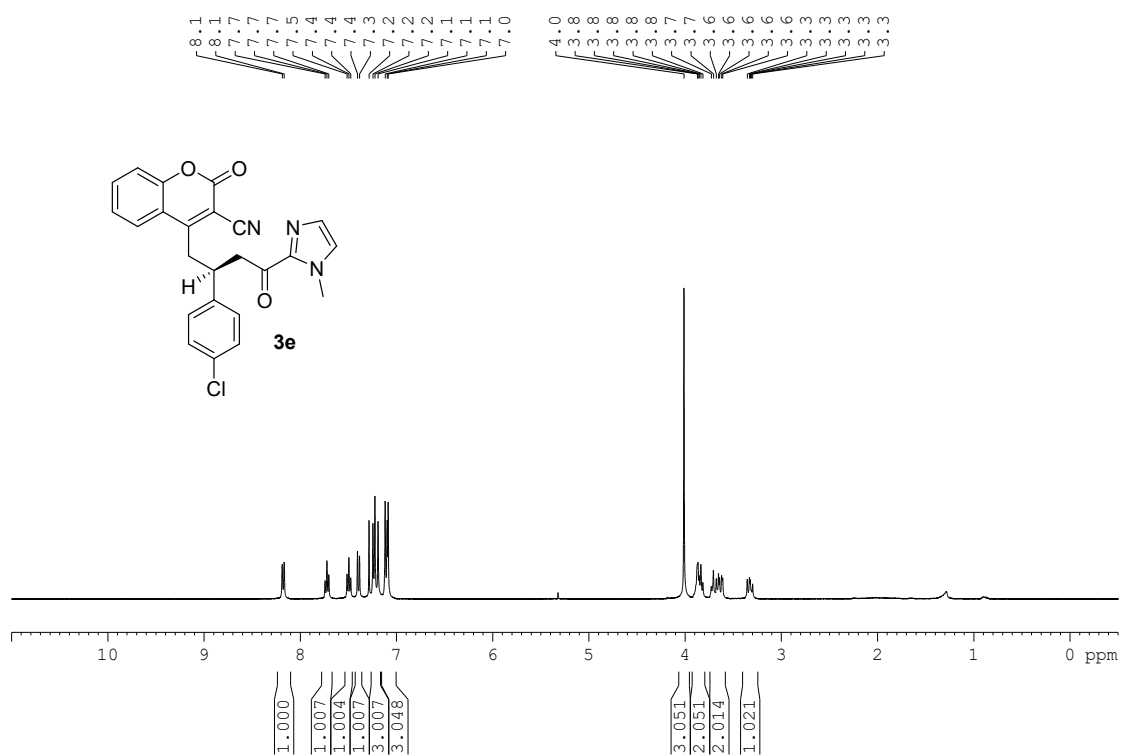

### <sup>13</sup>C NMR 3e

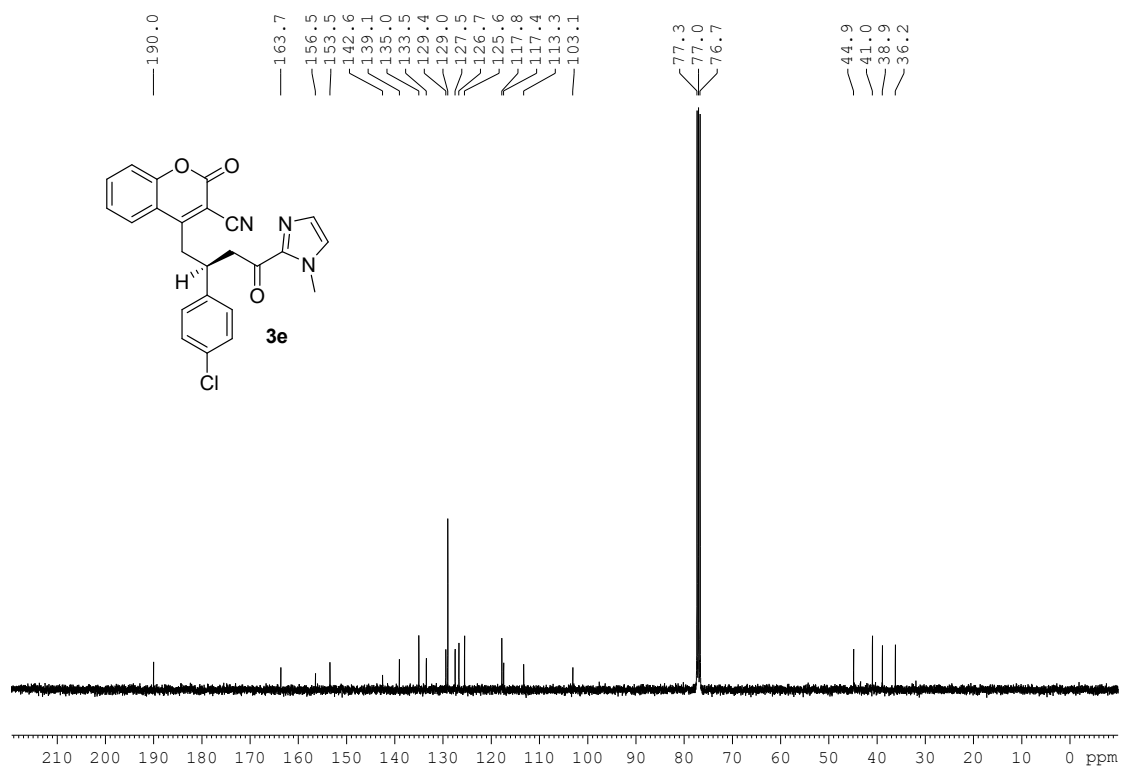

### <sup>1</sup>H NMR 3f

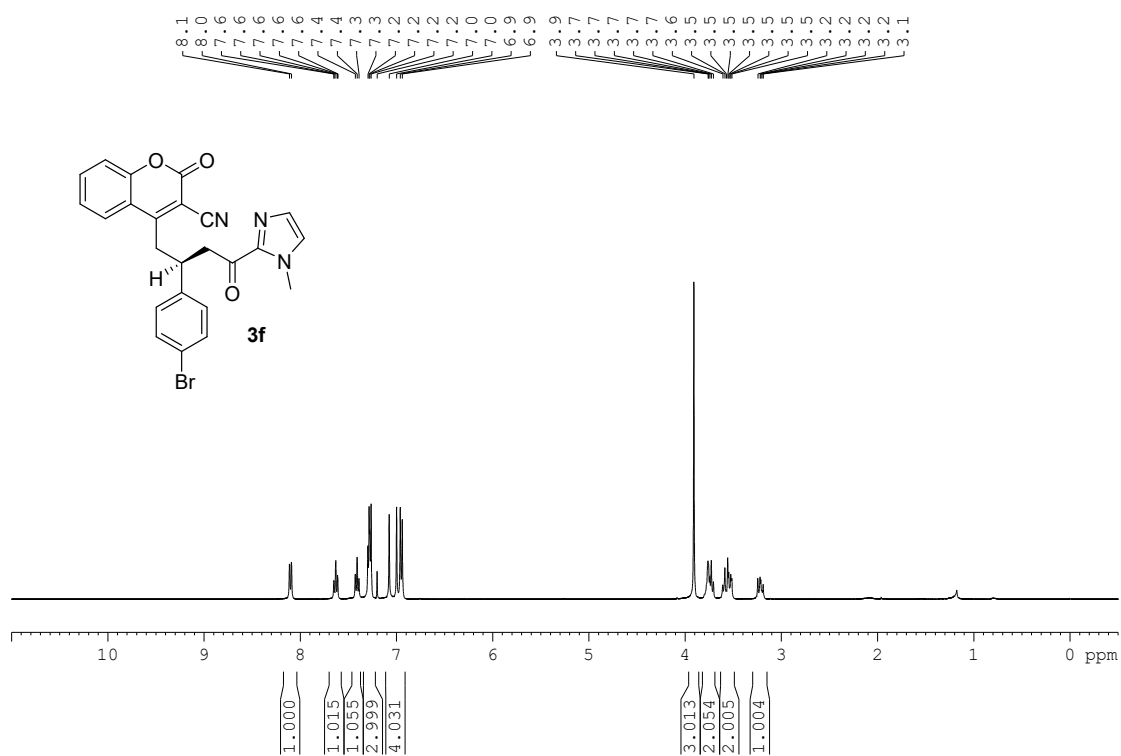

### <sup>13</sup>C NMR 3f

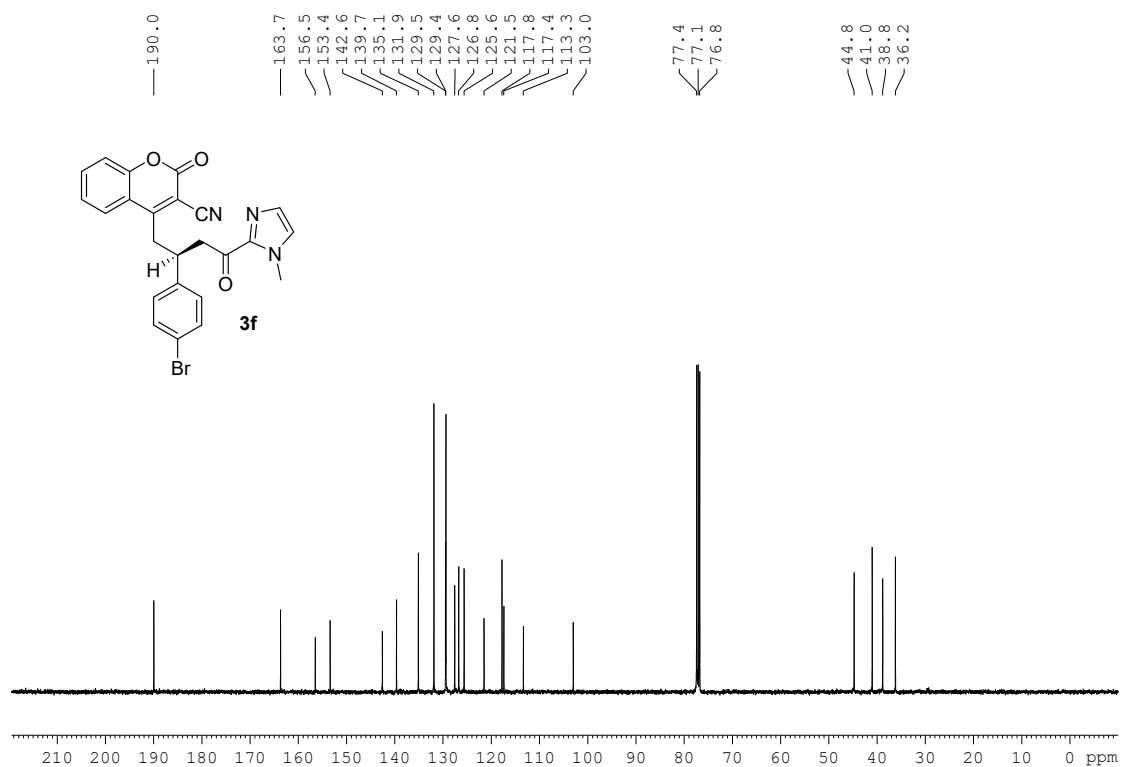

### <sup>1</sup>H NMR 3g

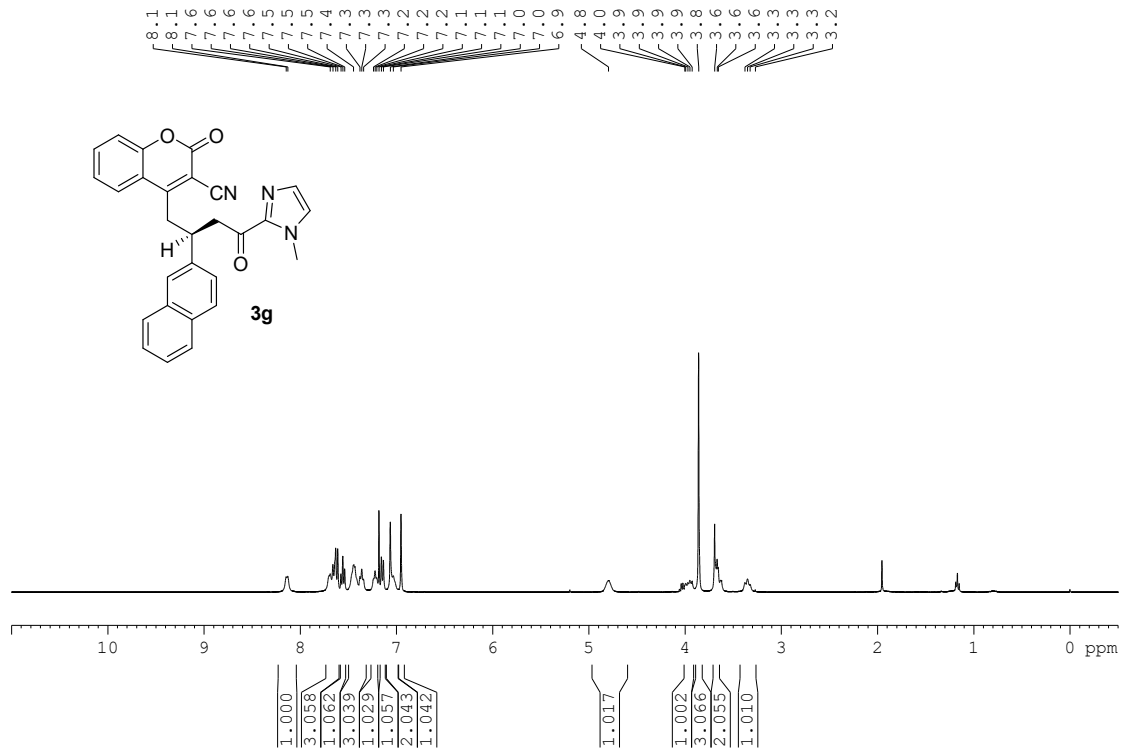

### <sup>13</sup>C NMR 3g

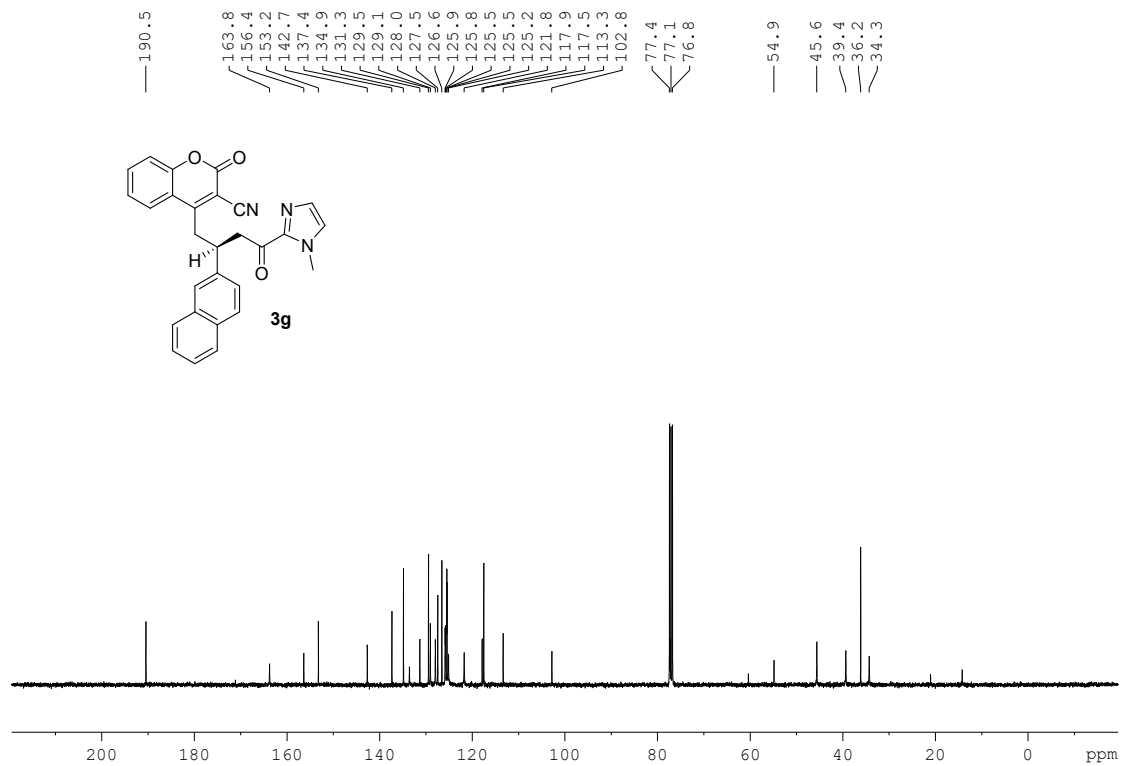

### <sup>1</sup>H NMR 3h

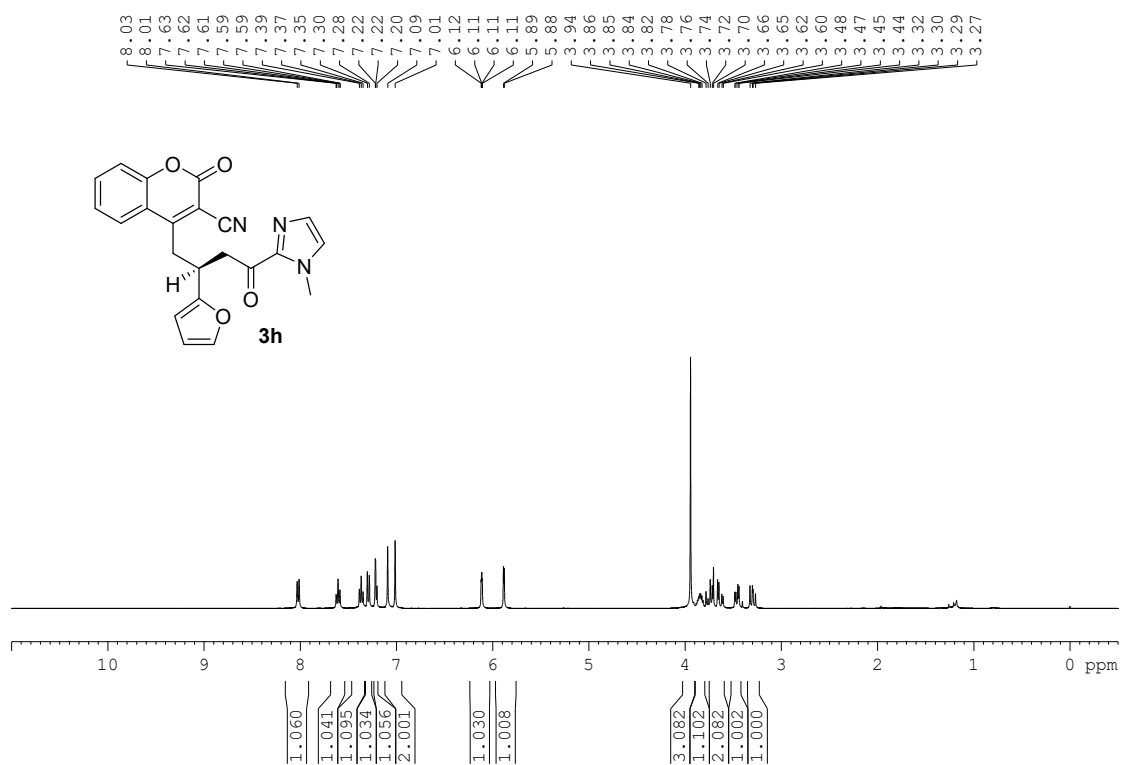

### <sup>13</sup>C NMR 3h

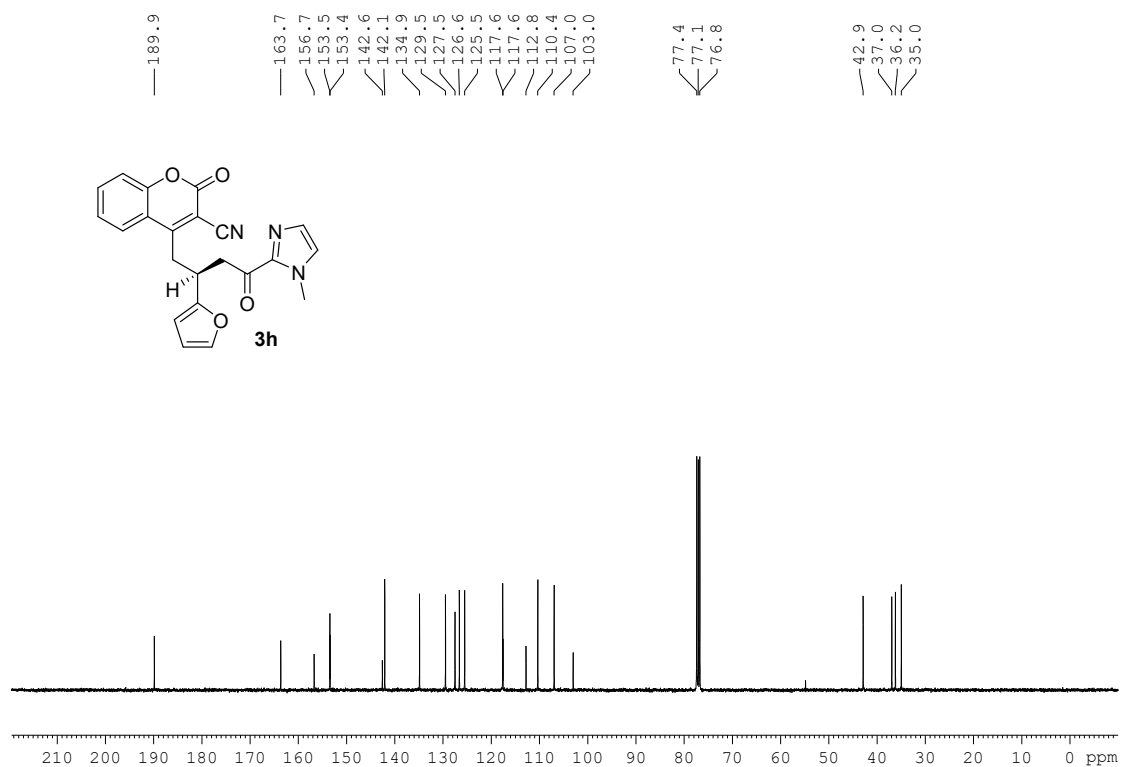

### <sup>1</sup>H NMR 3i

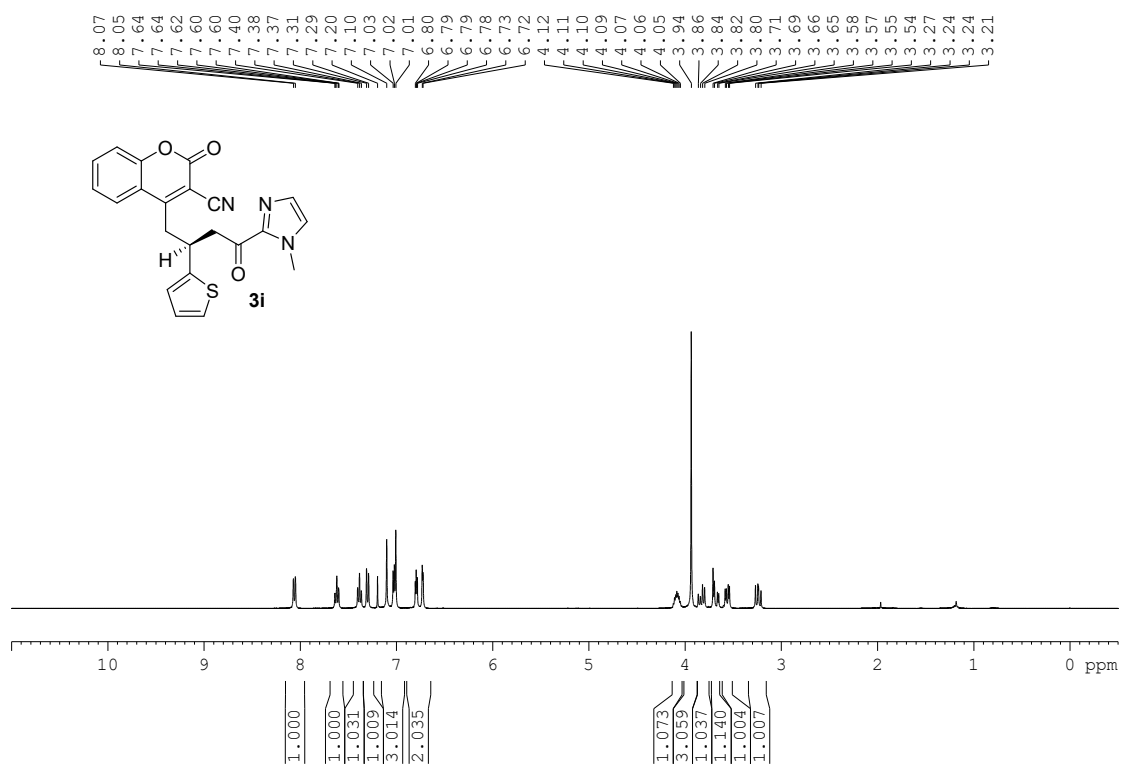

### <sup>13</sup>C NMR 3i

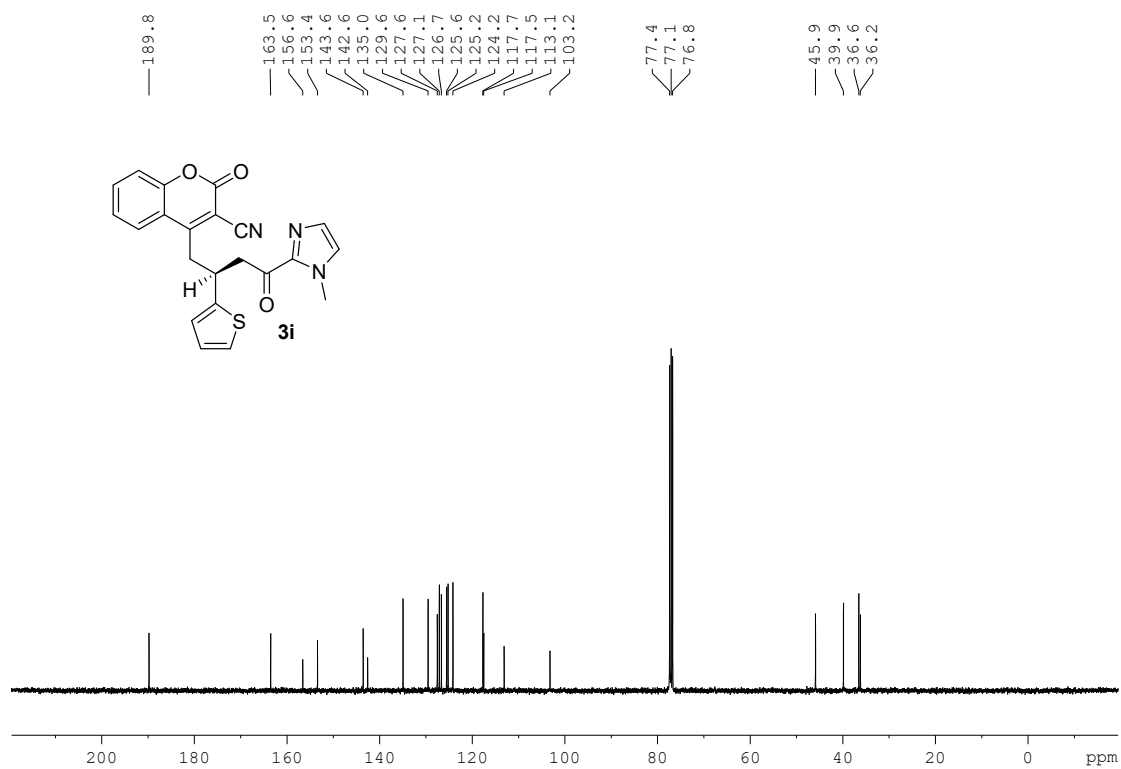

### <sup>1</sup>H NMR 3j

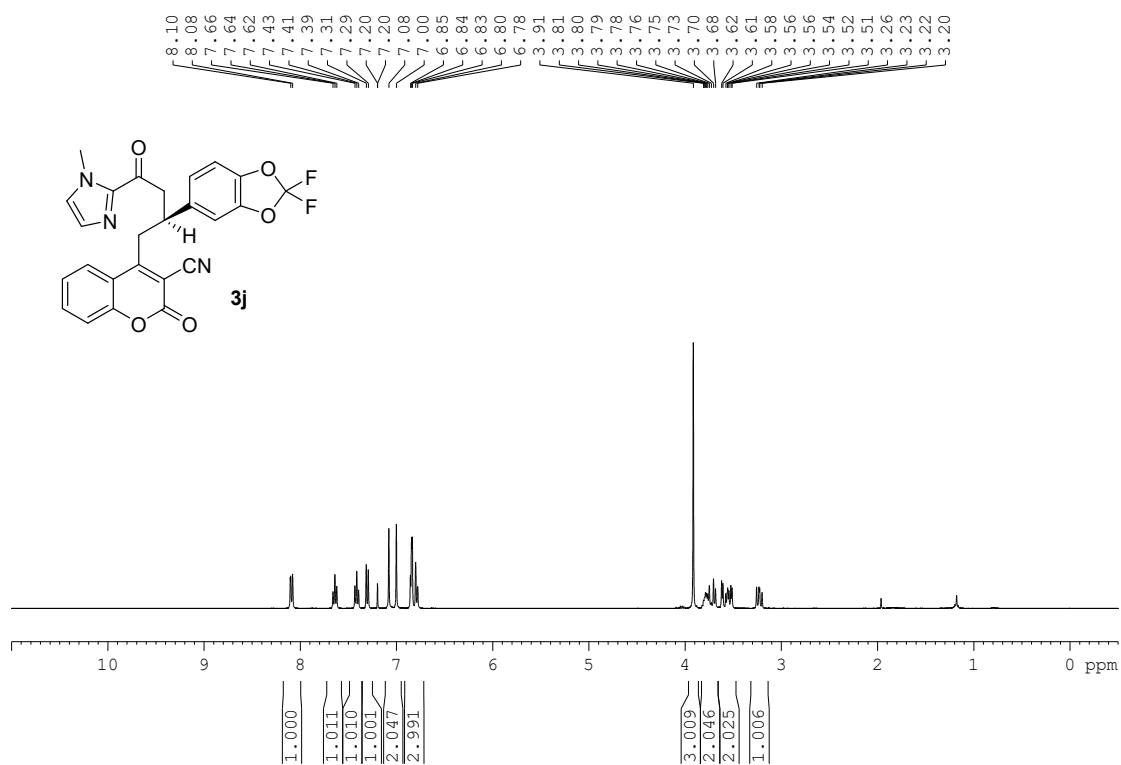

### <sup>13</sup>C NMR 3j

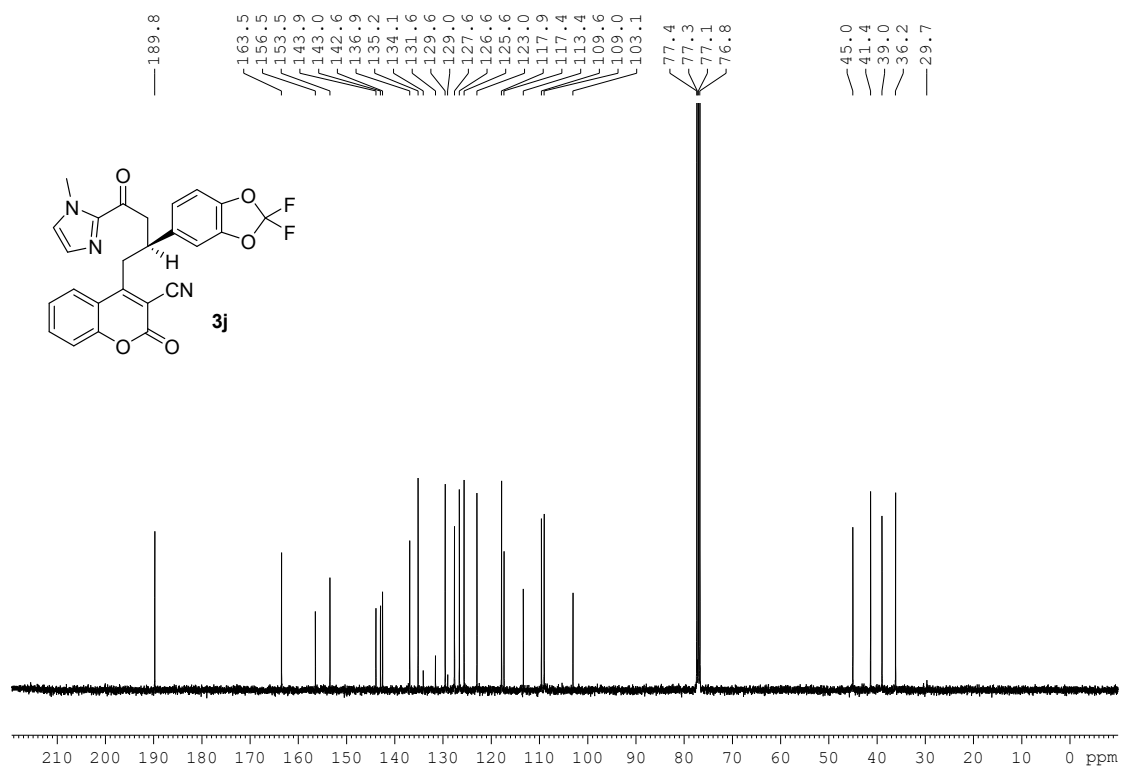



# <sup>19</sup>F NMR 3j

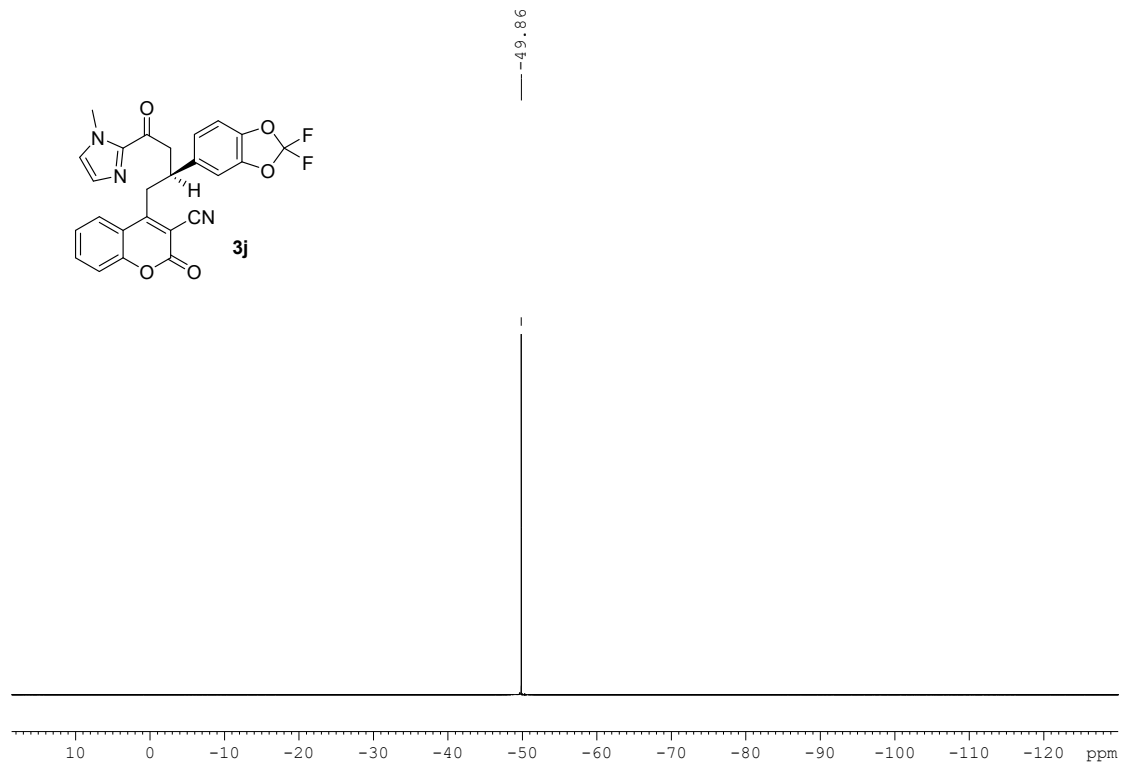

# <sup>1</sup>H NMR 3k

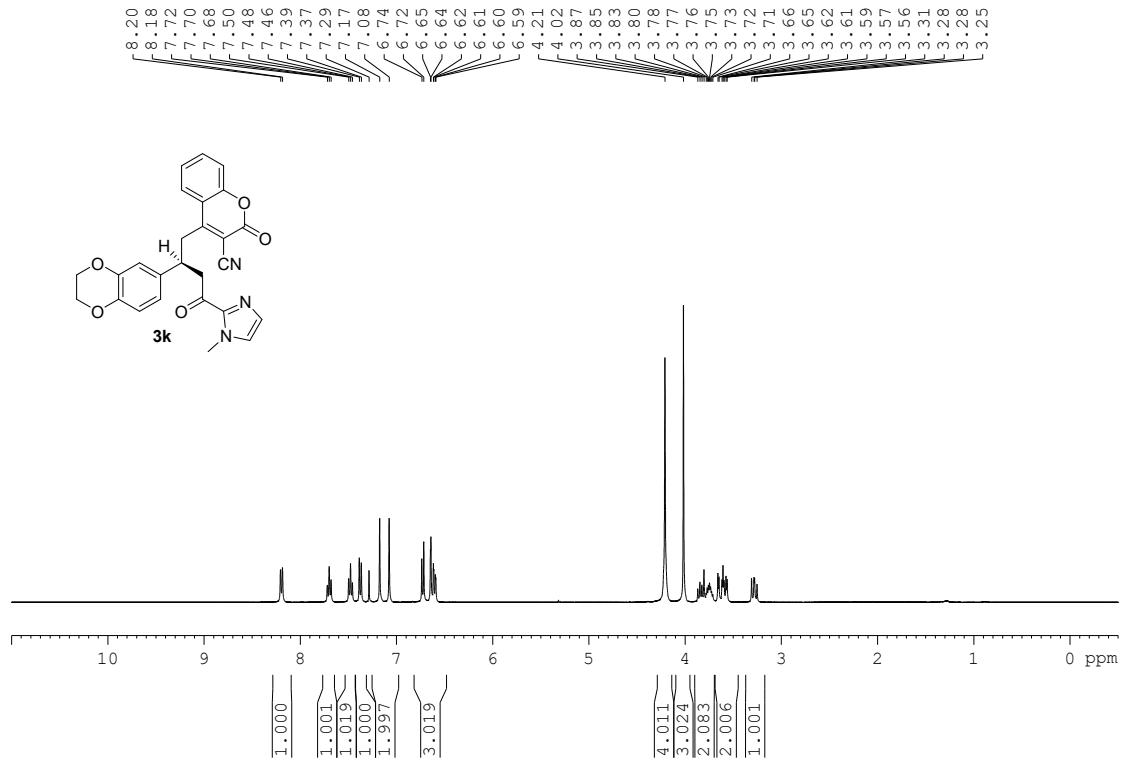

### <sup>13</sup>C NMR 3k

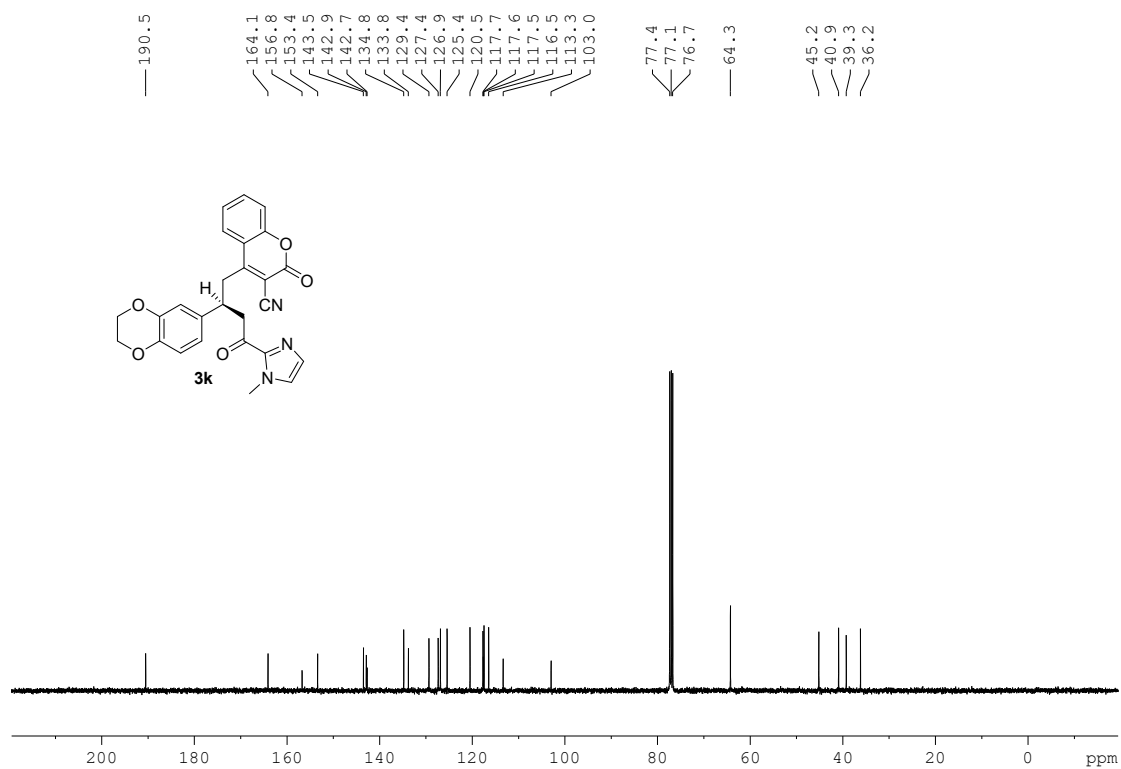

### <sup>1</sup>H NMR 3l

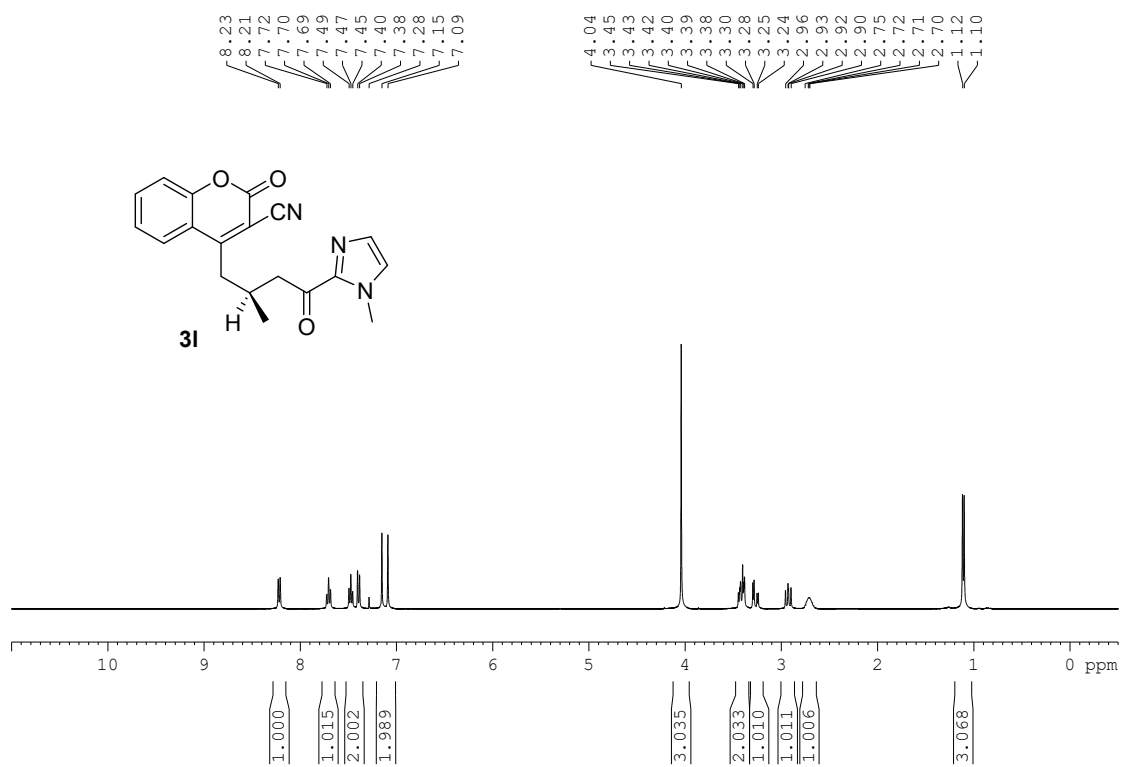

### <sup>13</sup>C NMR 3l

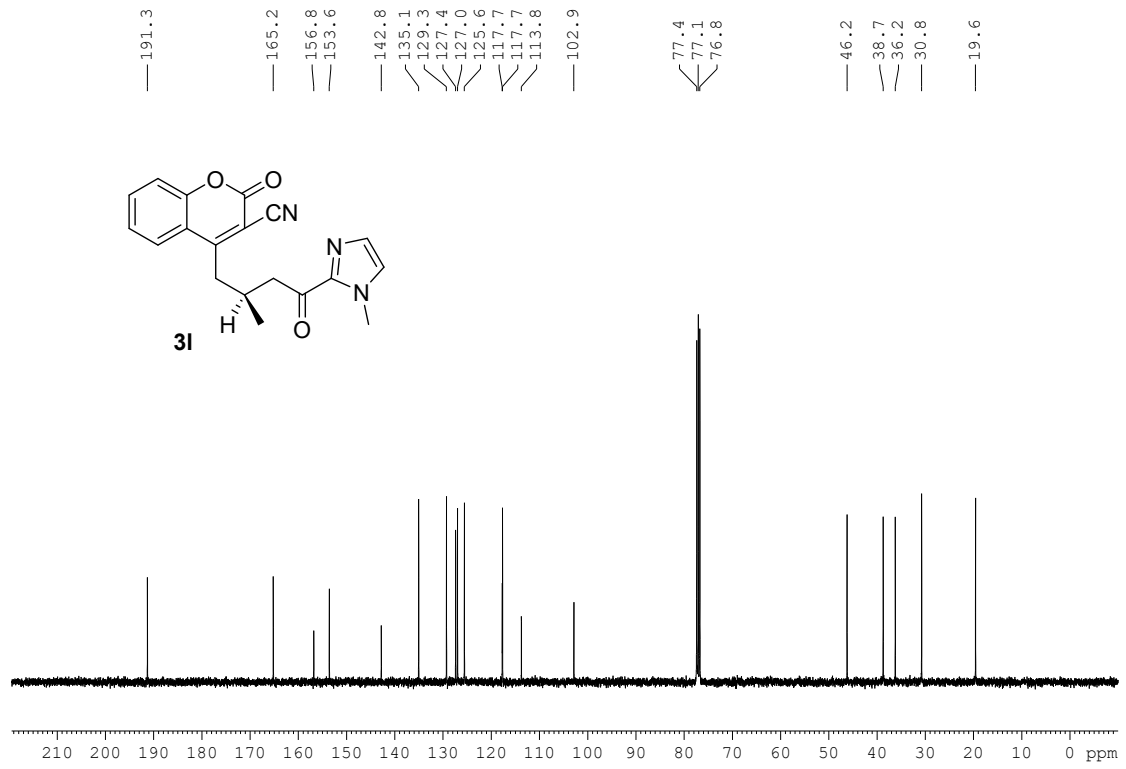

### <sup>1</sup>H NMR 3m

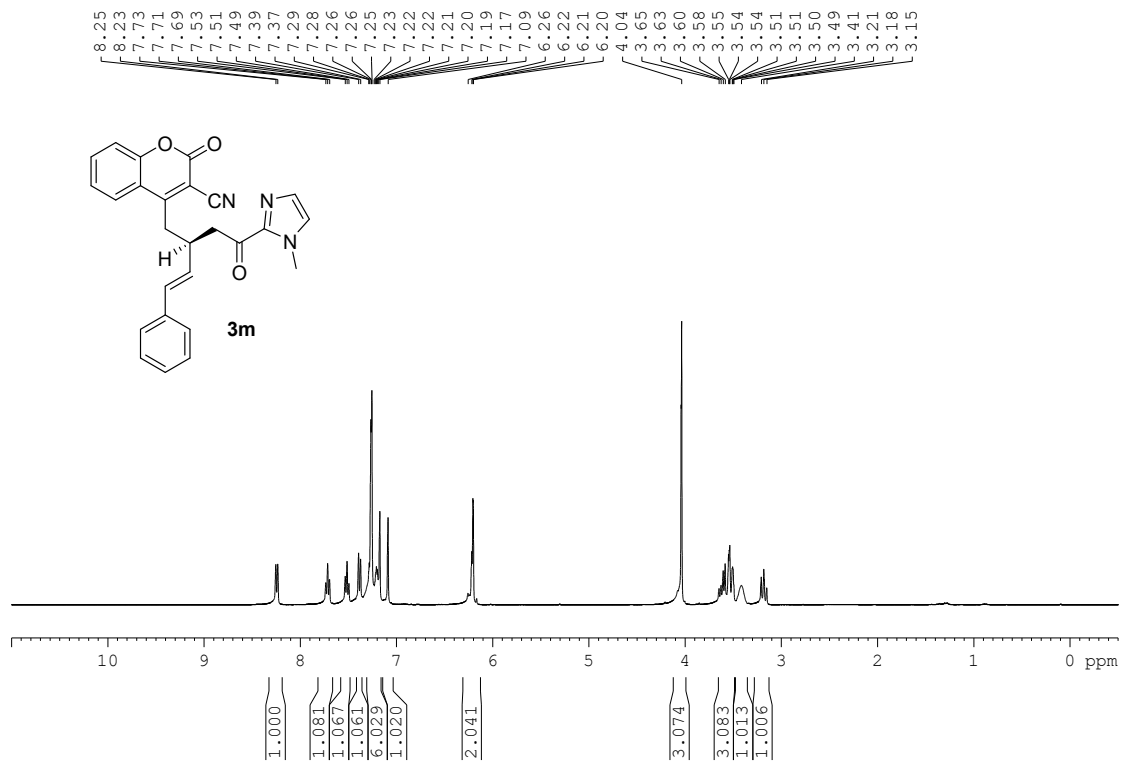

### <sup>13</sup>C NMR 3m

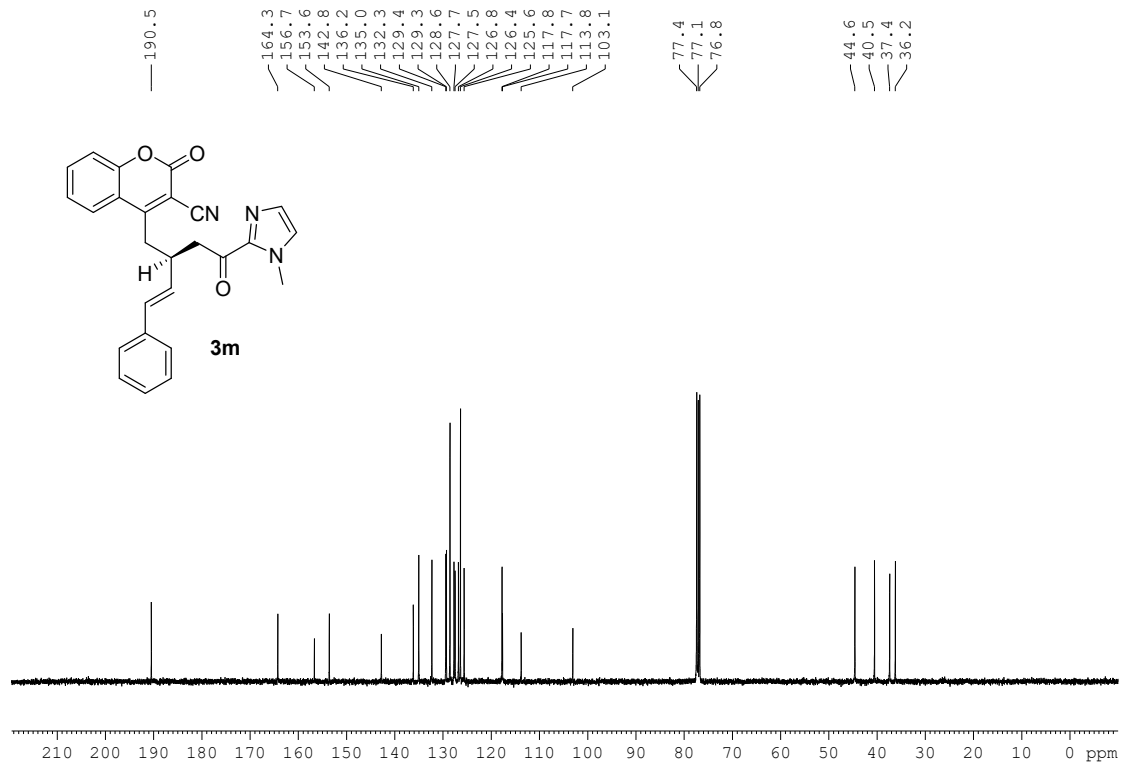

### <sup>1</sup>H NMR 3n

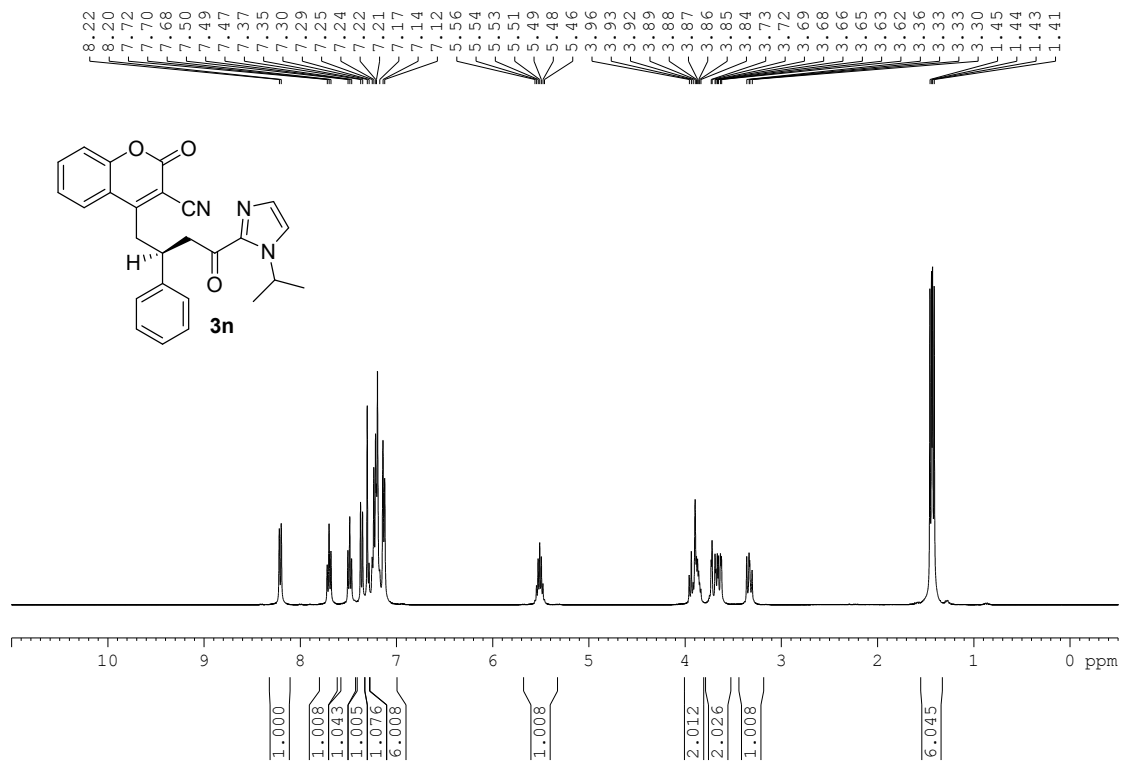

### <sup>13</sup>C NMR 3n

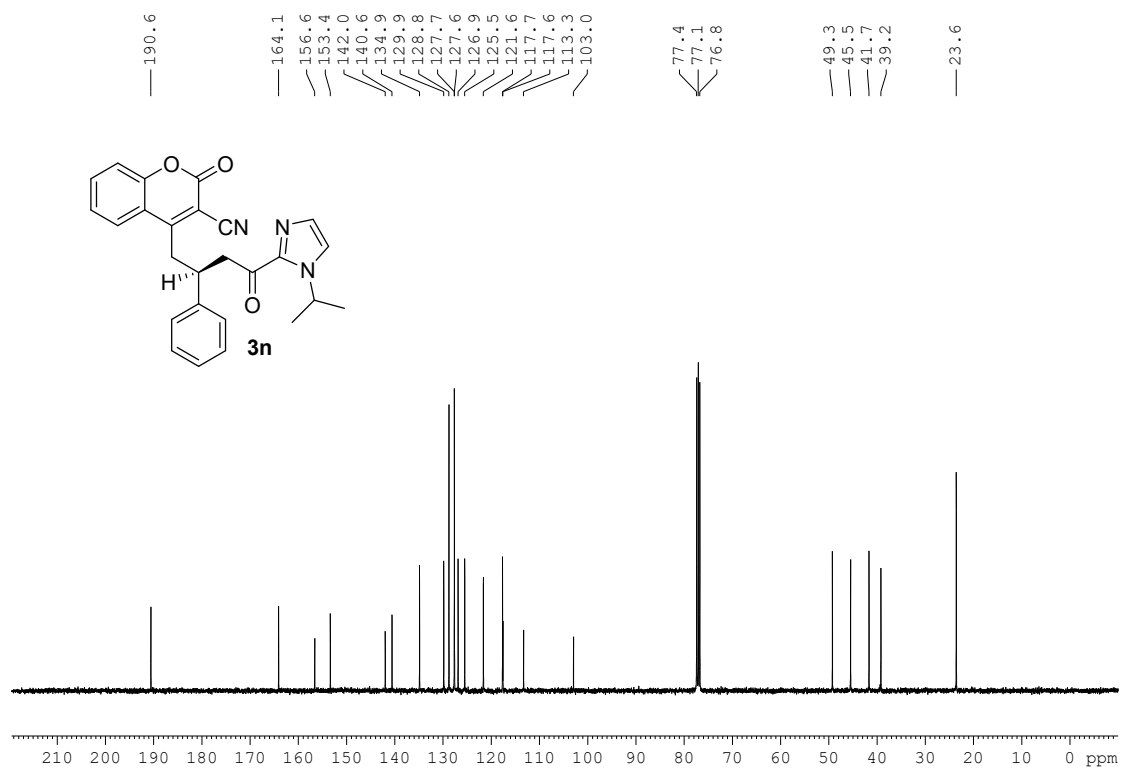

### <sup>1</sup>H NMR 3o

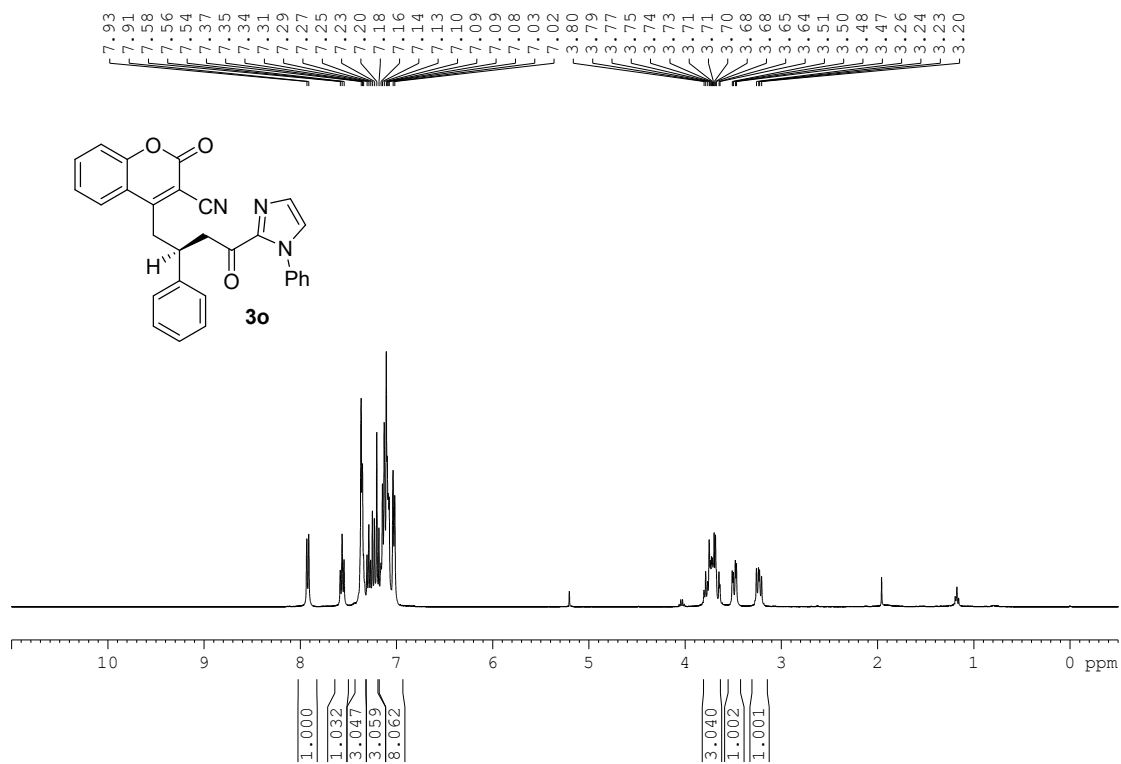

### <sup>13</sup>C NMR 3o

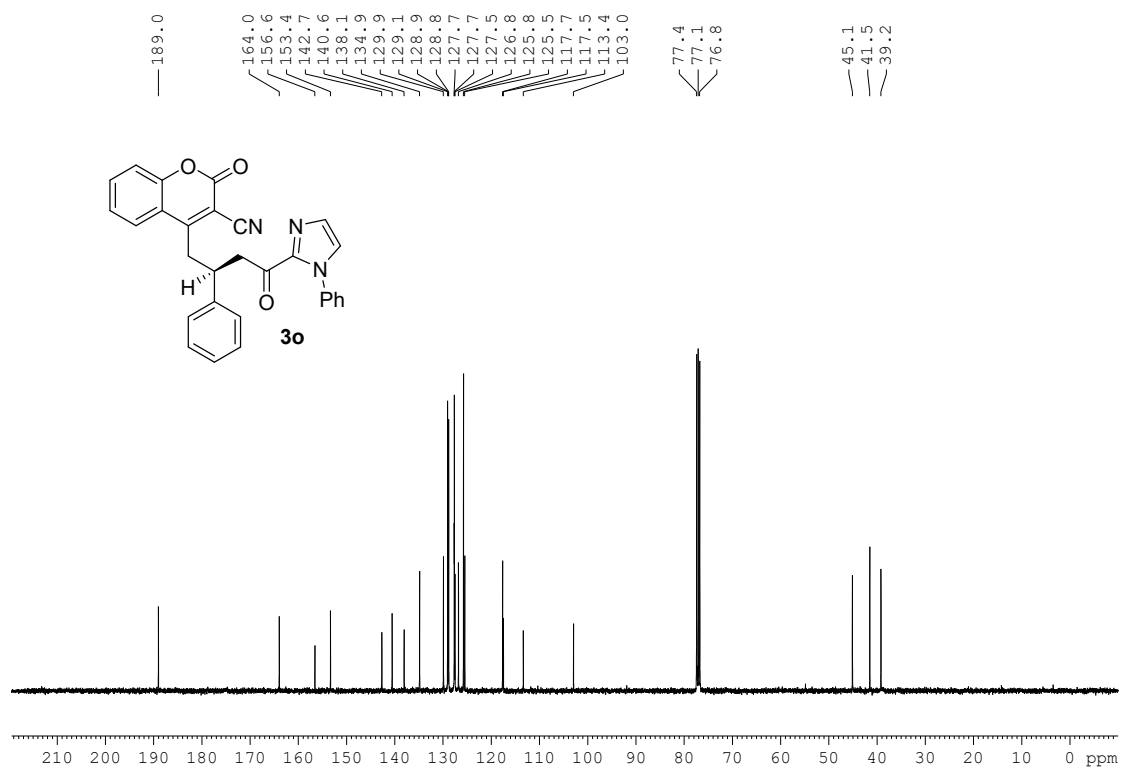

### <sup>1</sup>H NMR 4b

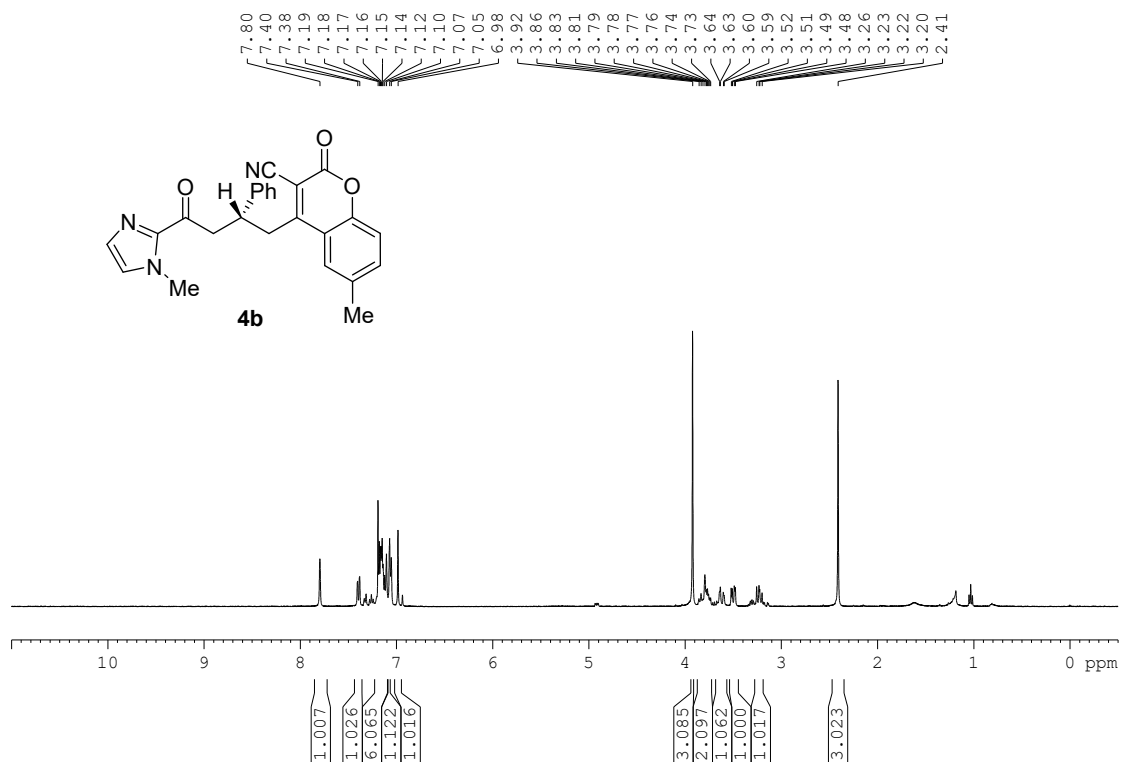

### <sup>13</sup>C NMR 4b

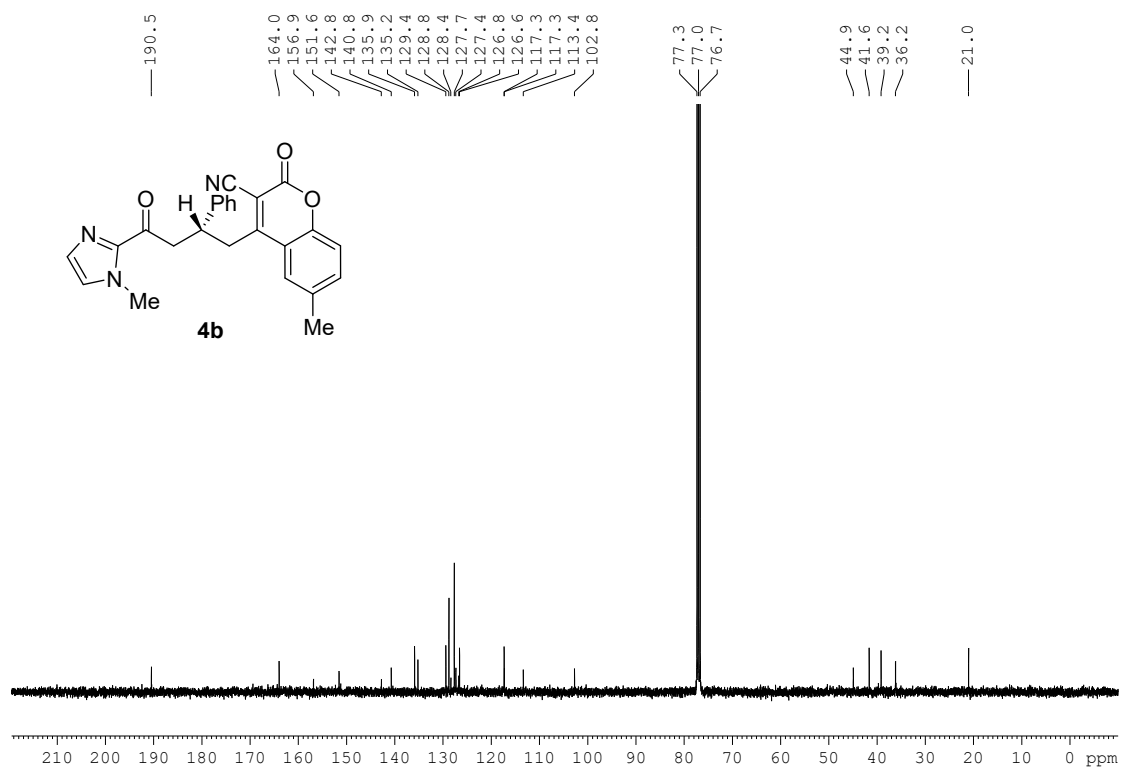

### <sup>1</sup>H NMR 4c

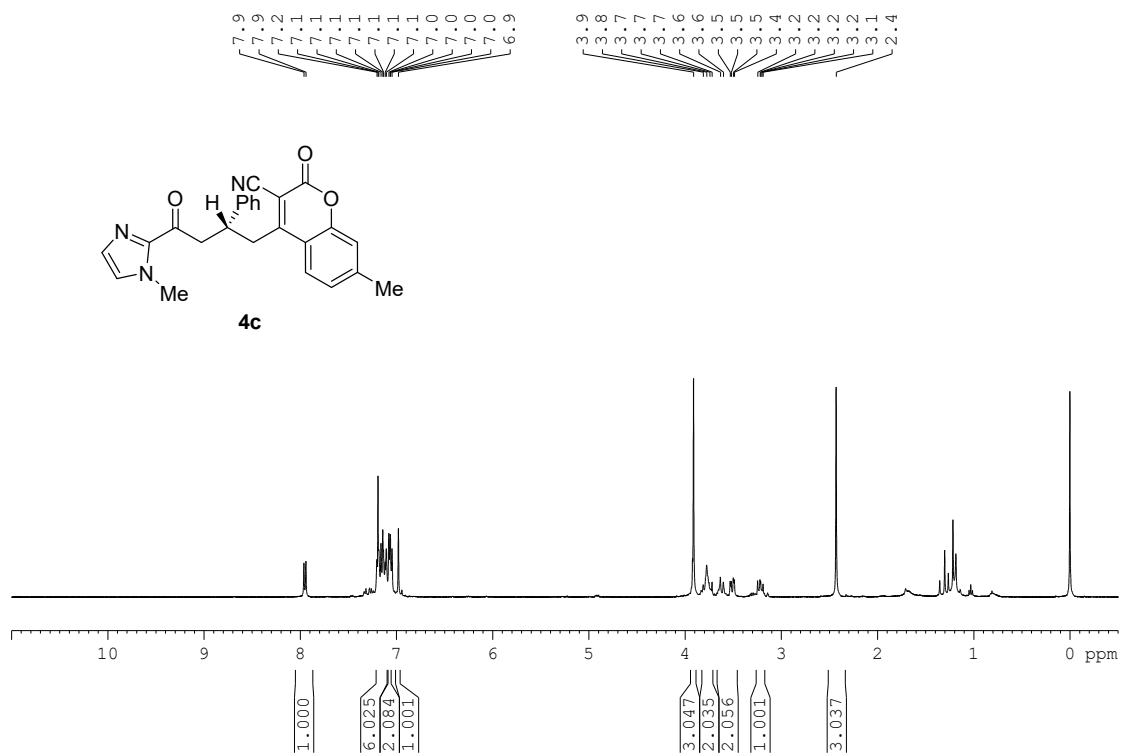

### <sup>13</sup>C NMR 4c

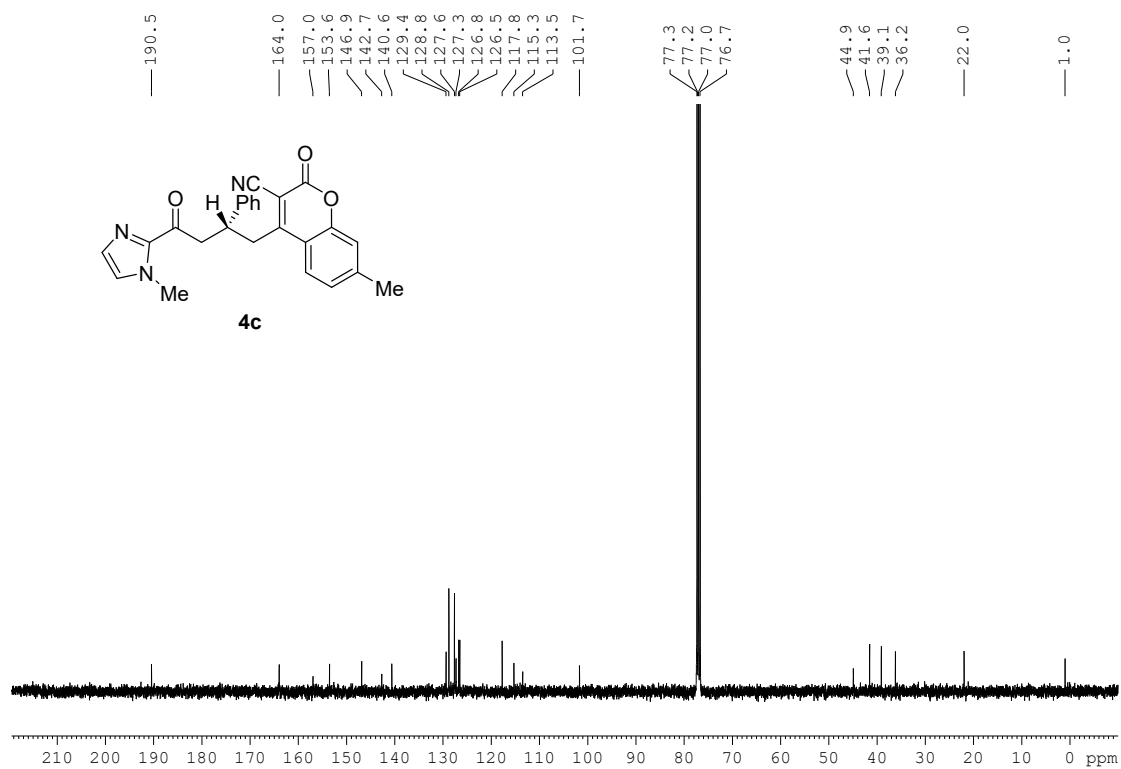

### <sup>1</sup>H NMR 4d

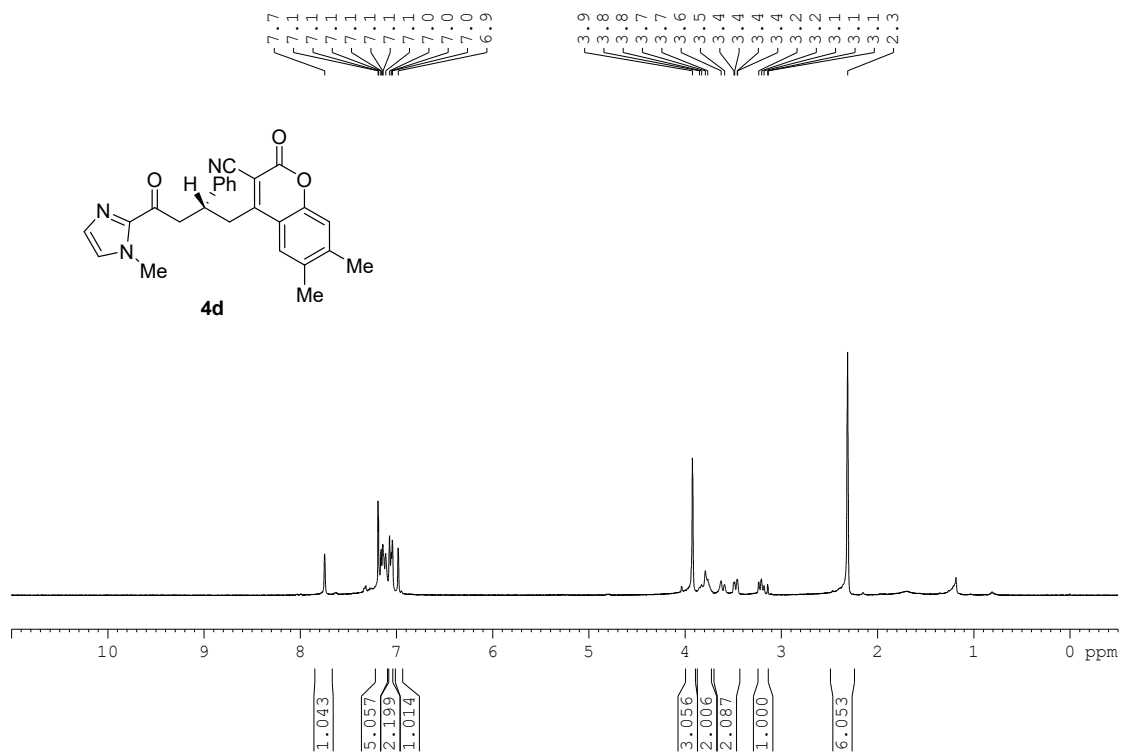



### <sup>13</sup>C NMR 4d

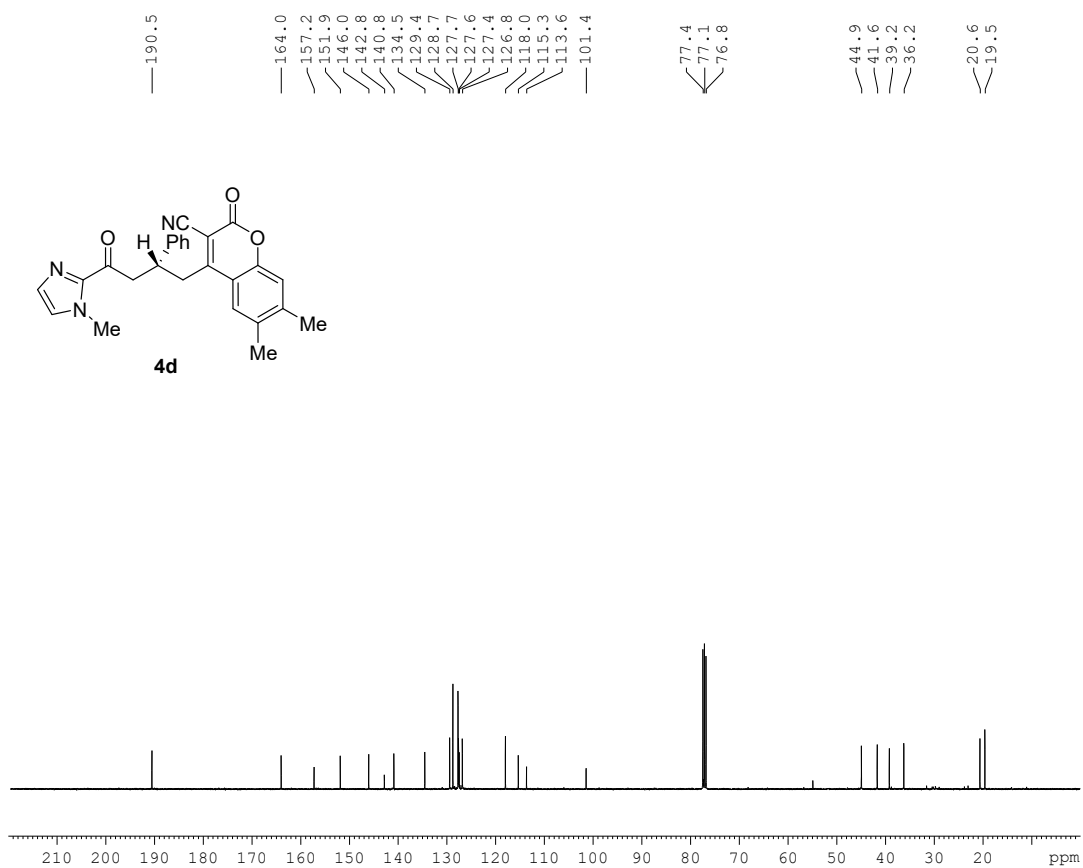

### <sup>1</sup>H NMR 4e

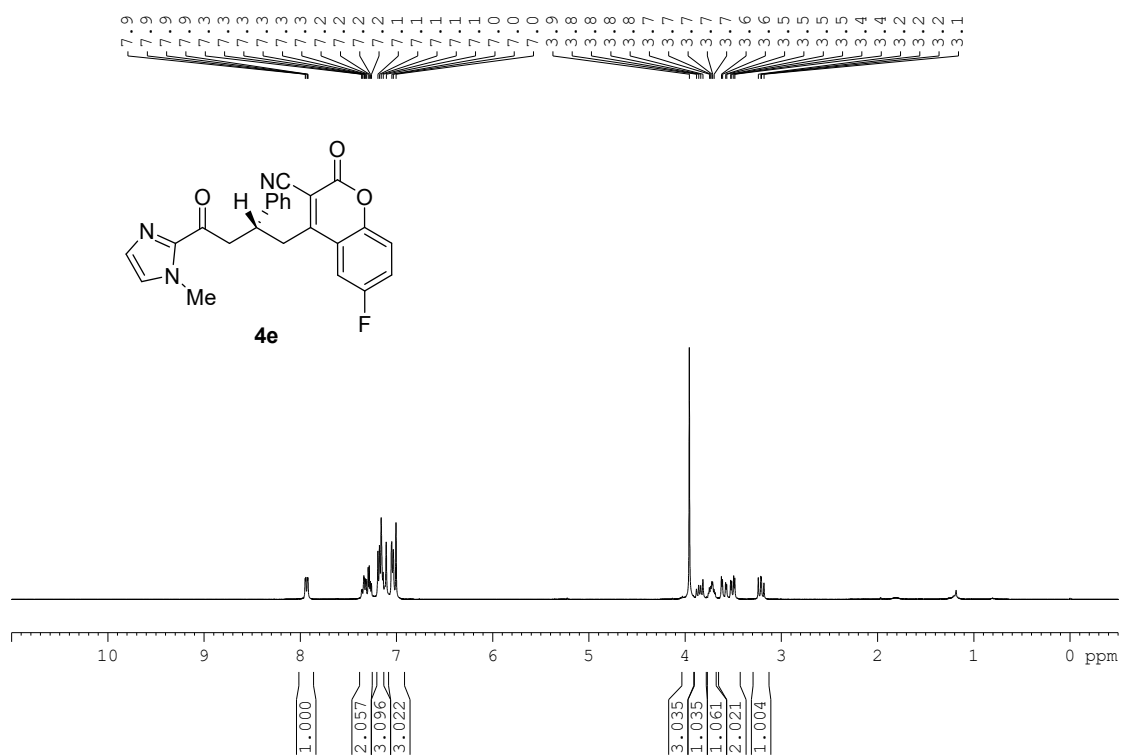

### <sup>13</sup>C NMR 4e

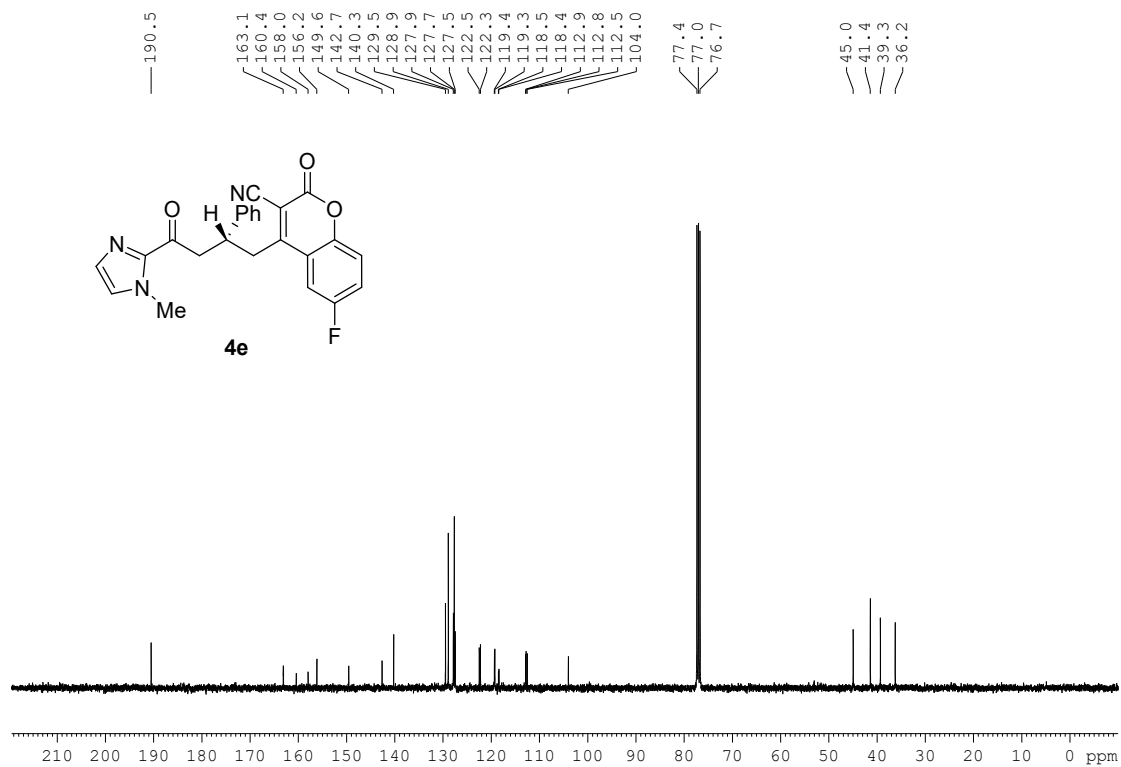

### <sup>19</sup>F NMR 4e

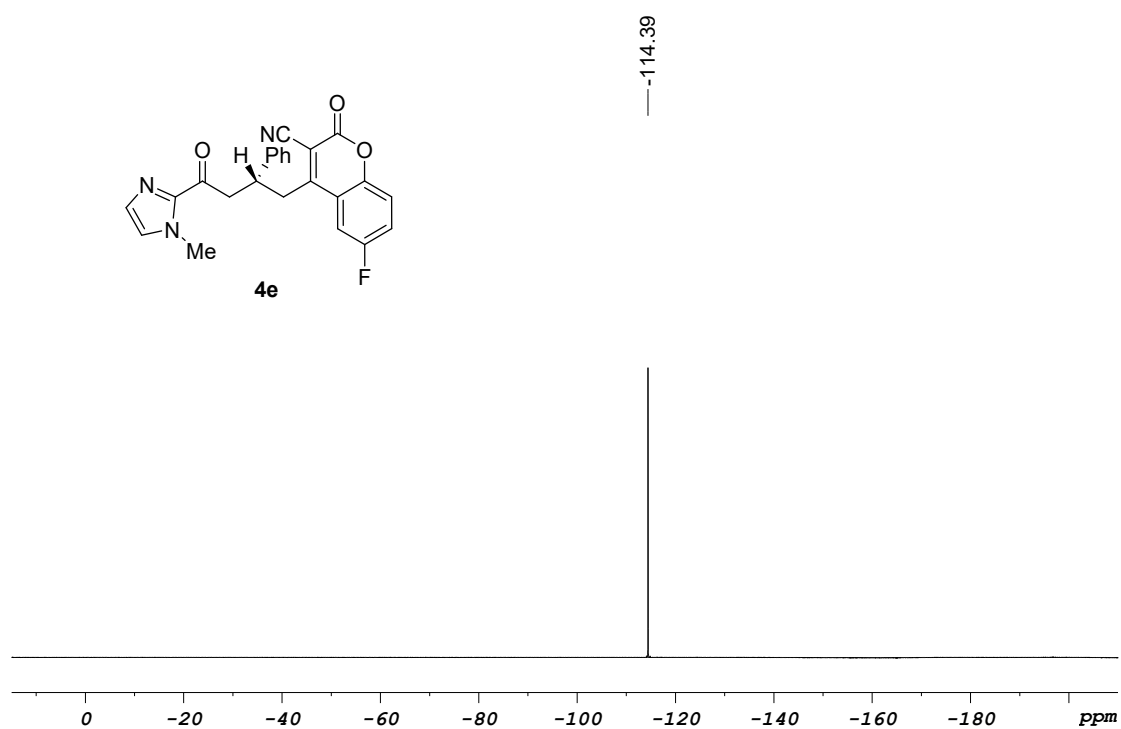

### <sup>1</sup>H NMR 4f

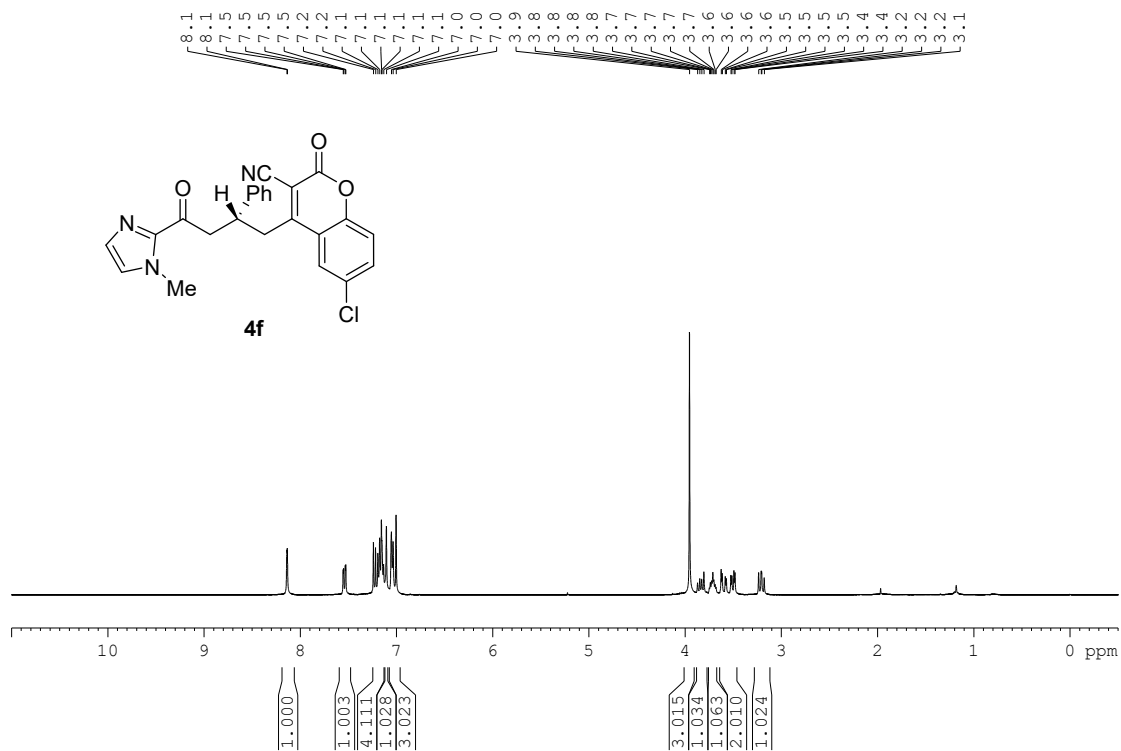

### <sup>13</sup>C NMR 4f

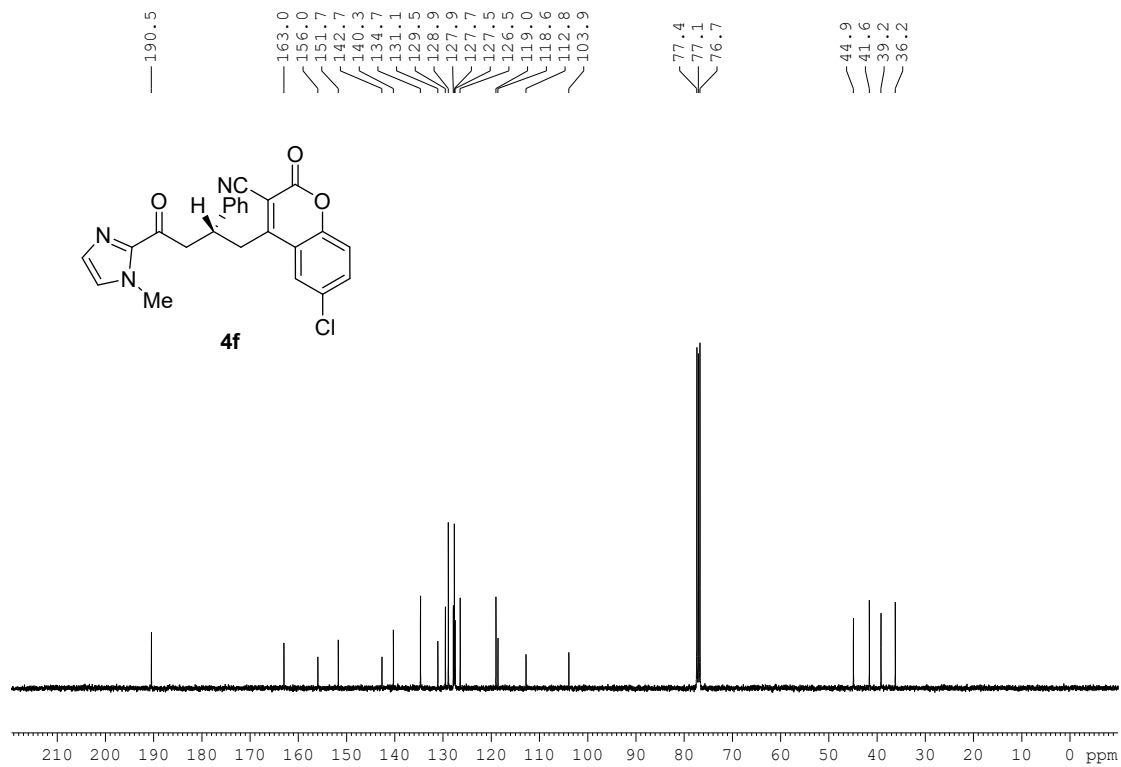

### <sup>1</sup>H NMR 4g

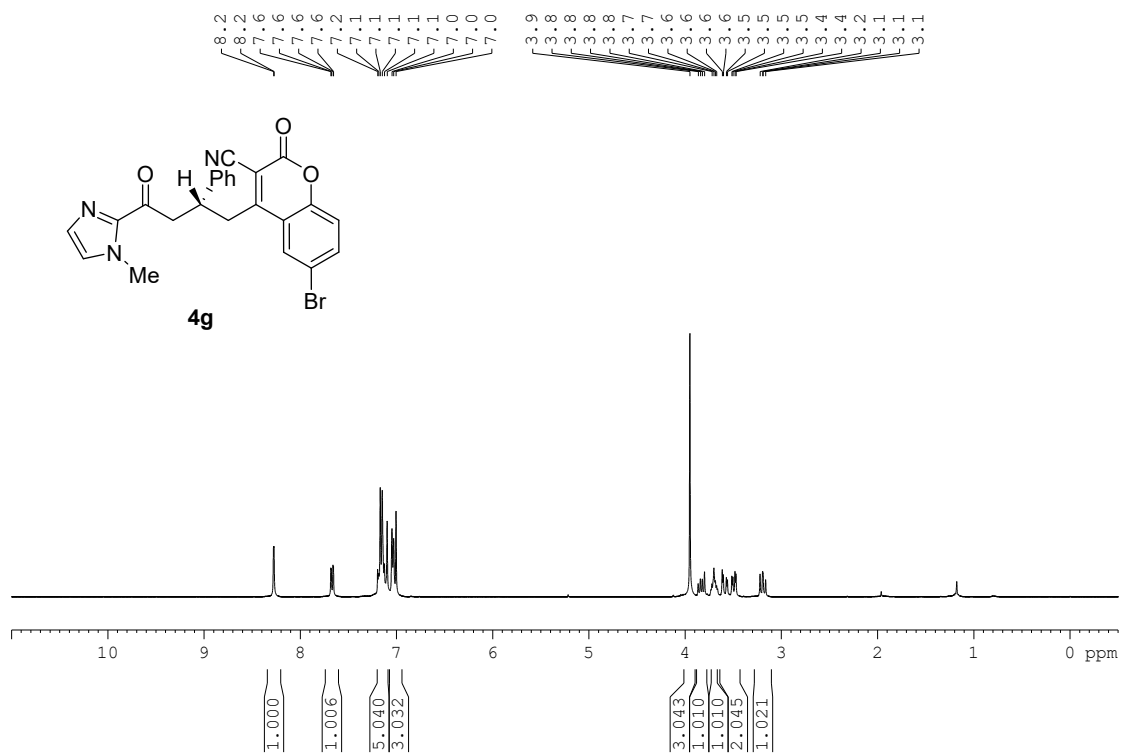

### <sup>13</sup>C NMR 4g

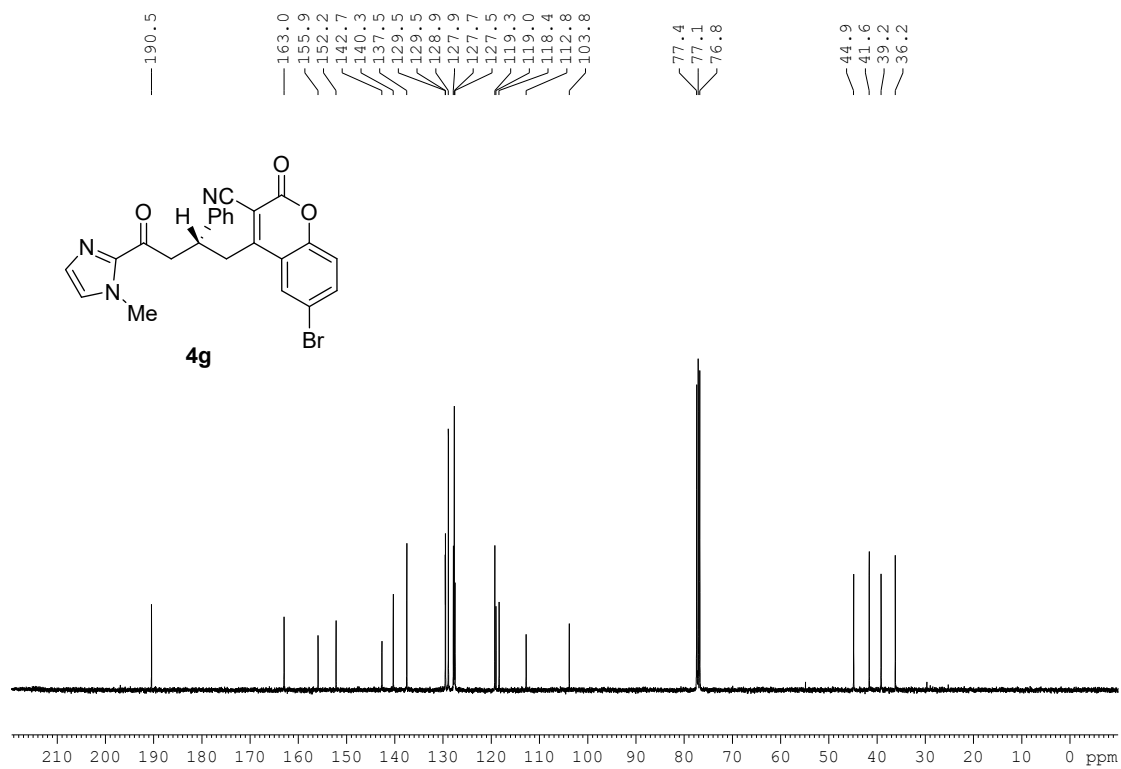

### <sup>1</sup>H NMR 4h

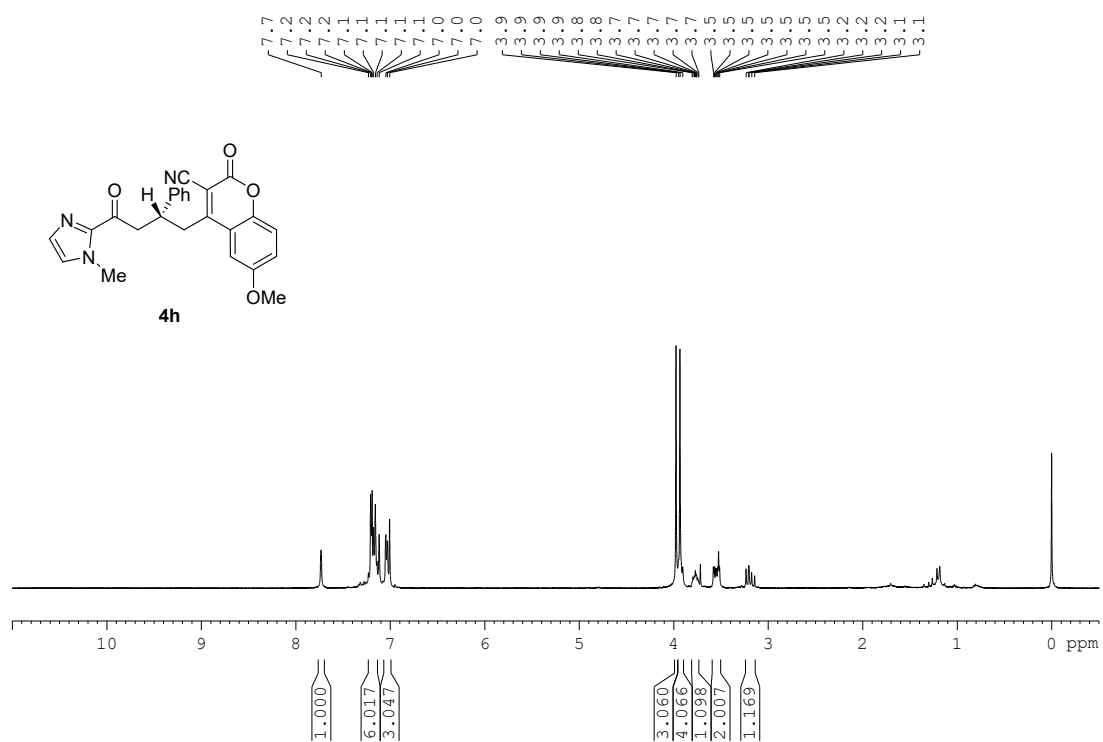

### <sup>13</sup>C NMR 4h

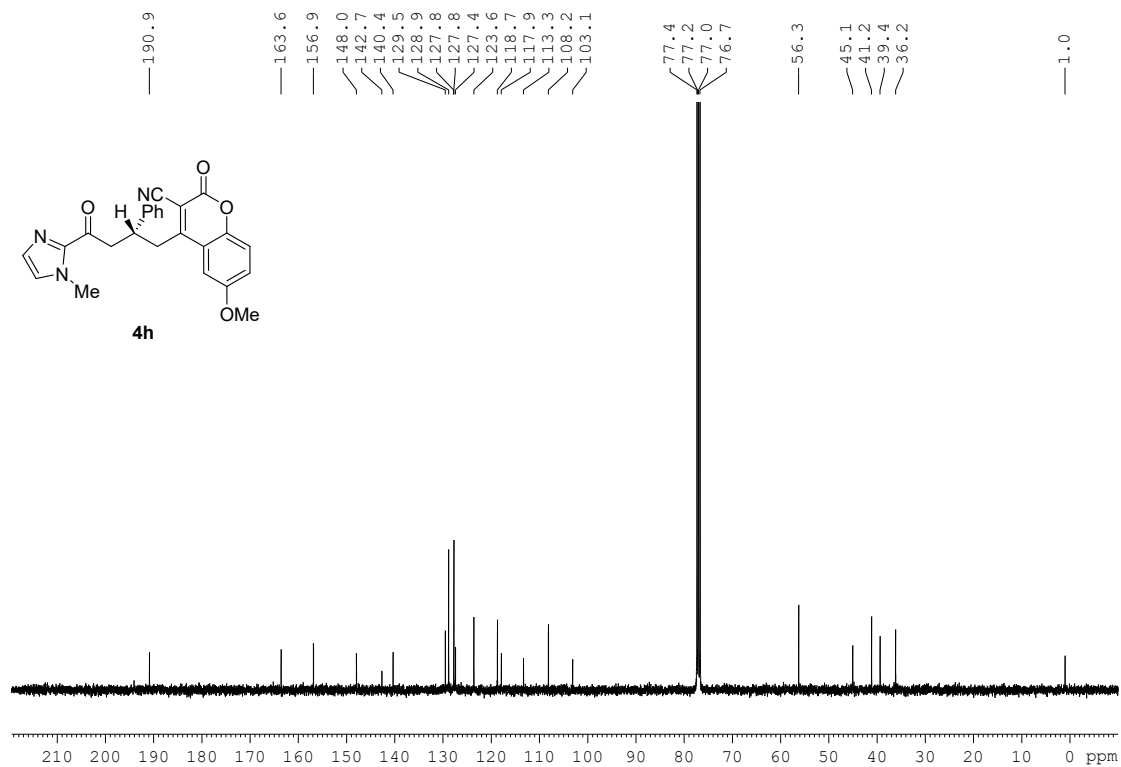

### <sup>1</sup>H NMR 4i

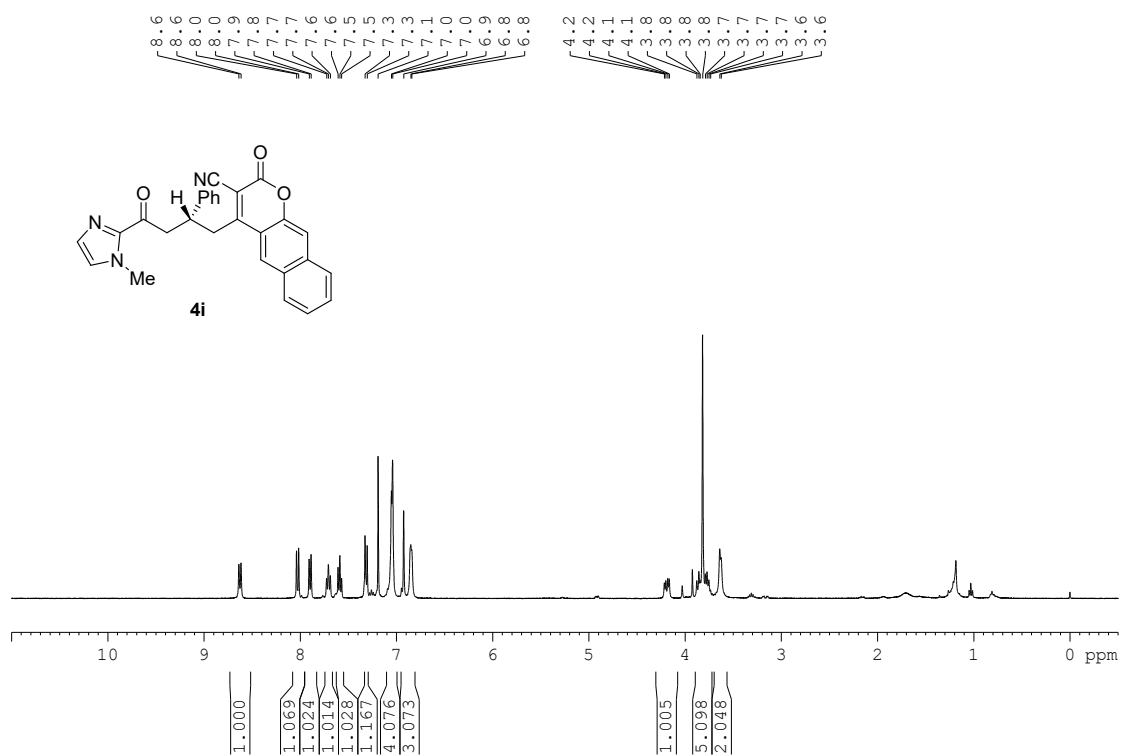

### <sup>13</sup>C NMR 4i

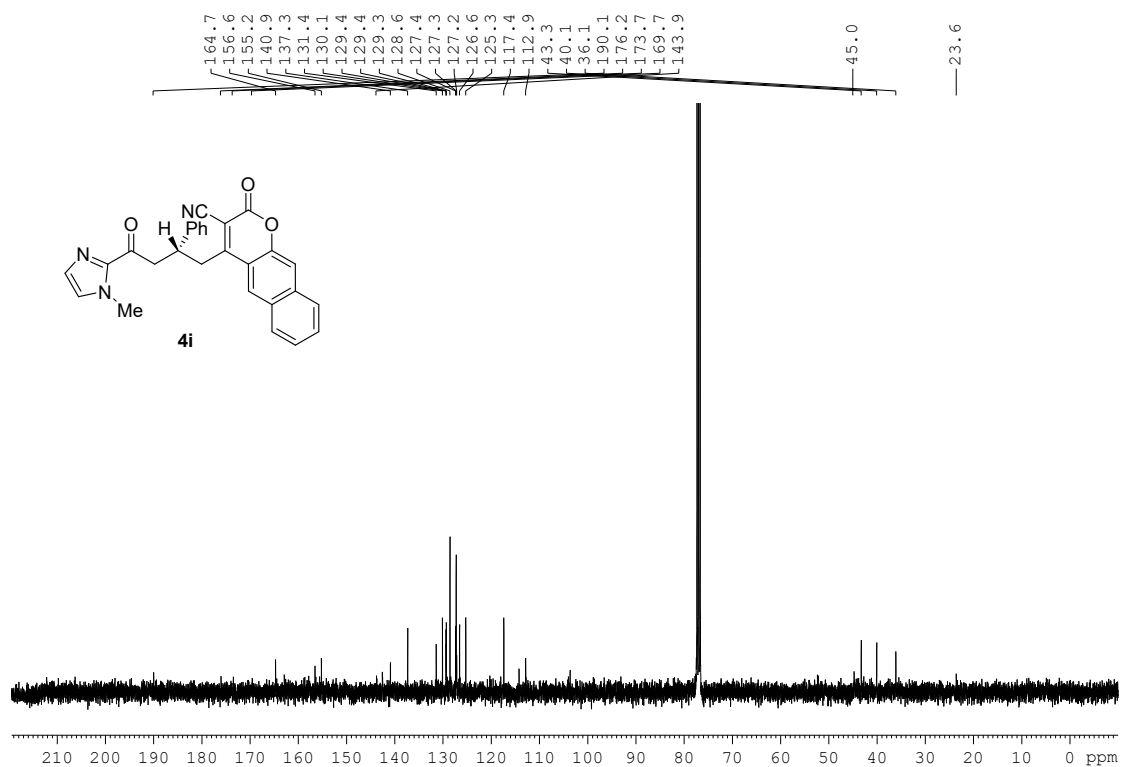

### <sup>1</sup>H NMR 4j

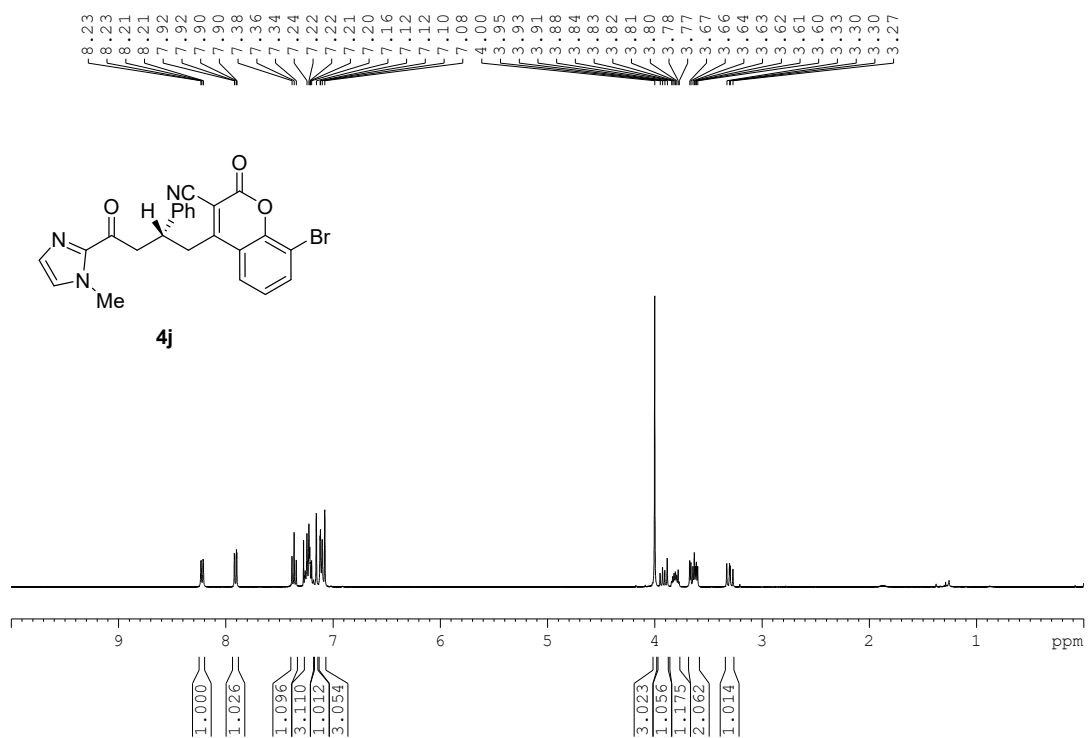

### <sup>13</sup>C NMR 4j

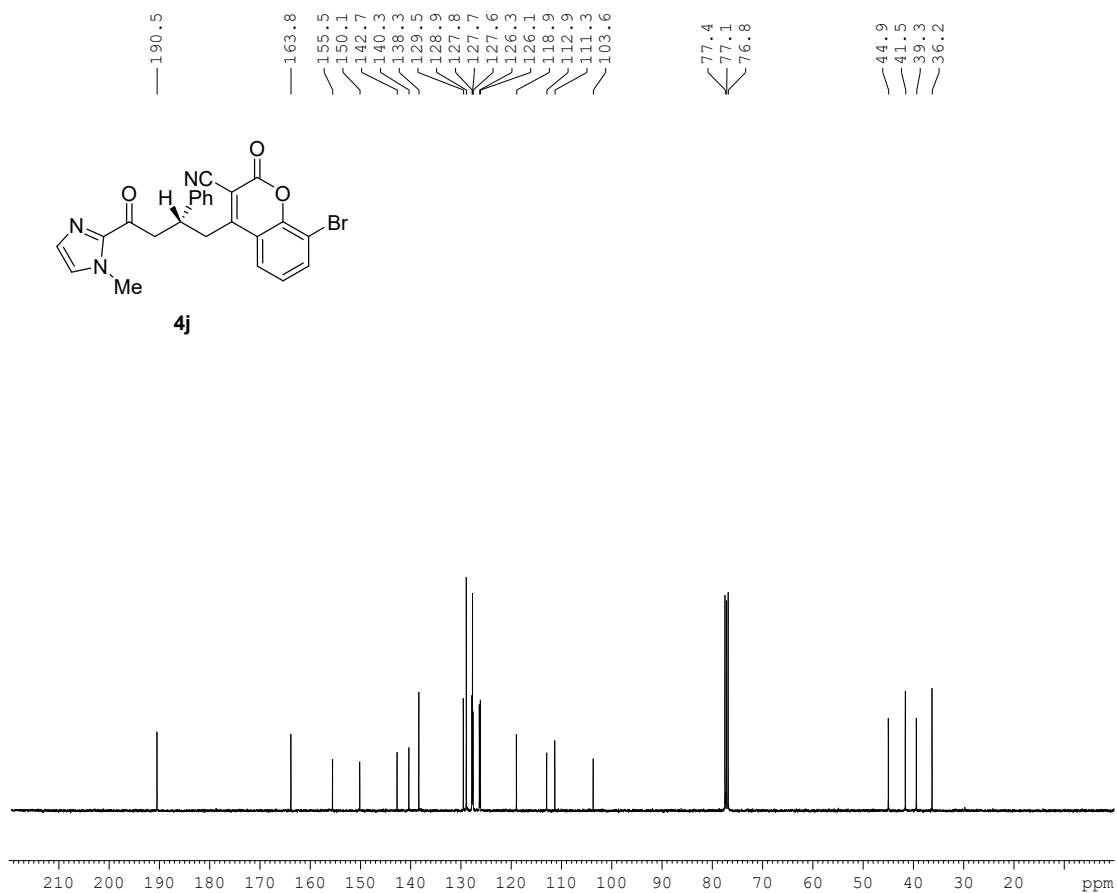

# <sup>1</sup>H NMR 5a

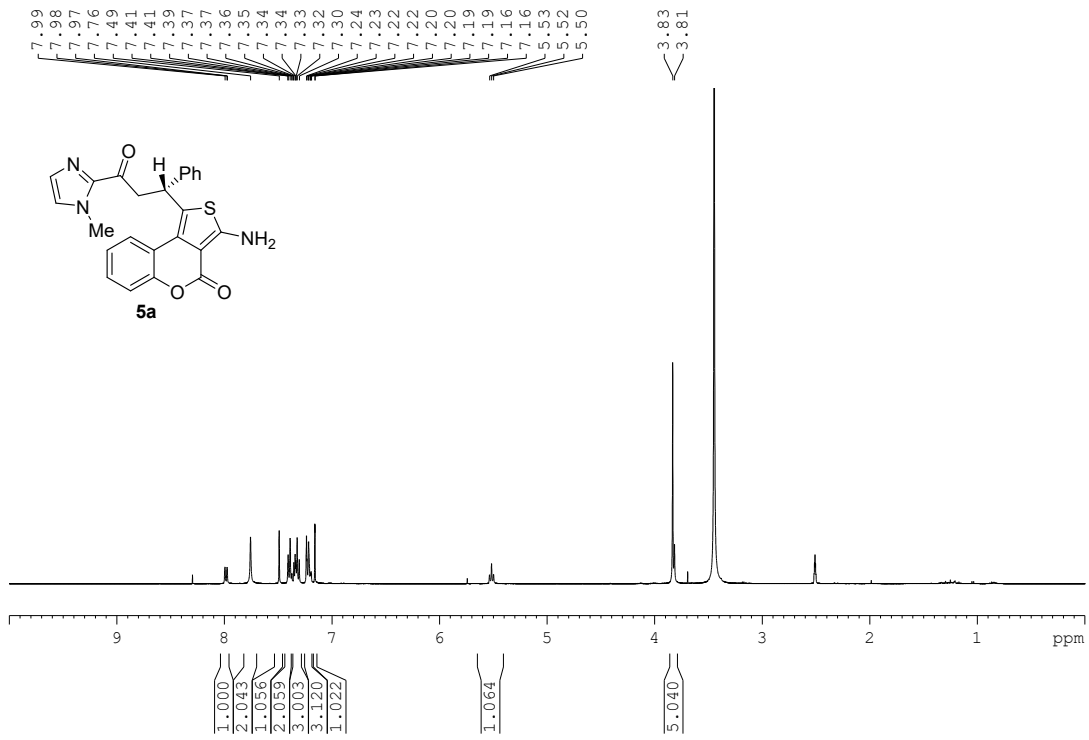

# <sup>13</sup>C NMR 5a

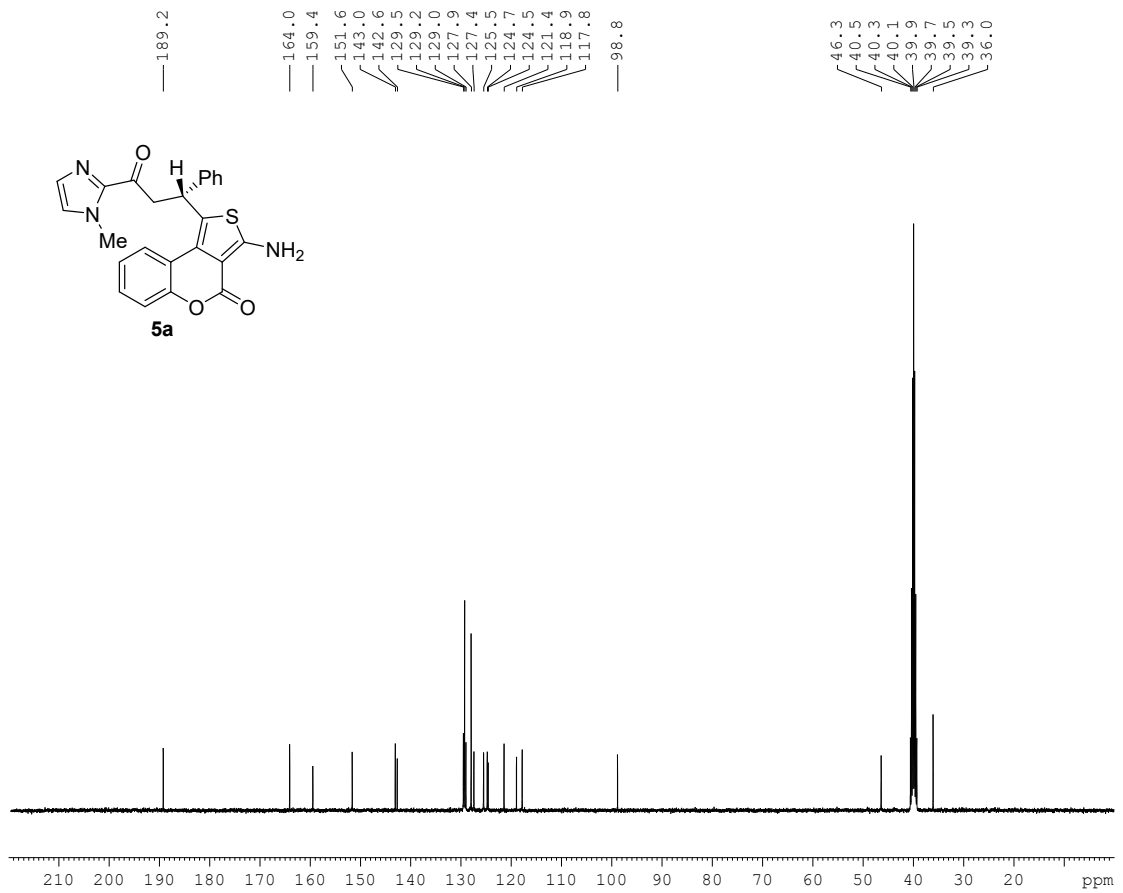



## VI Chiral HPLC analysis trace

### racemic-3a

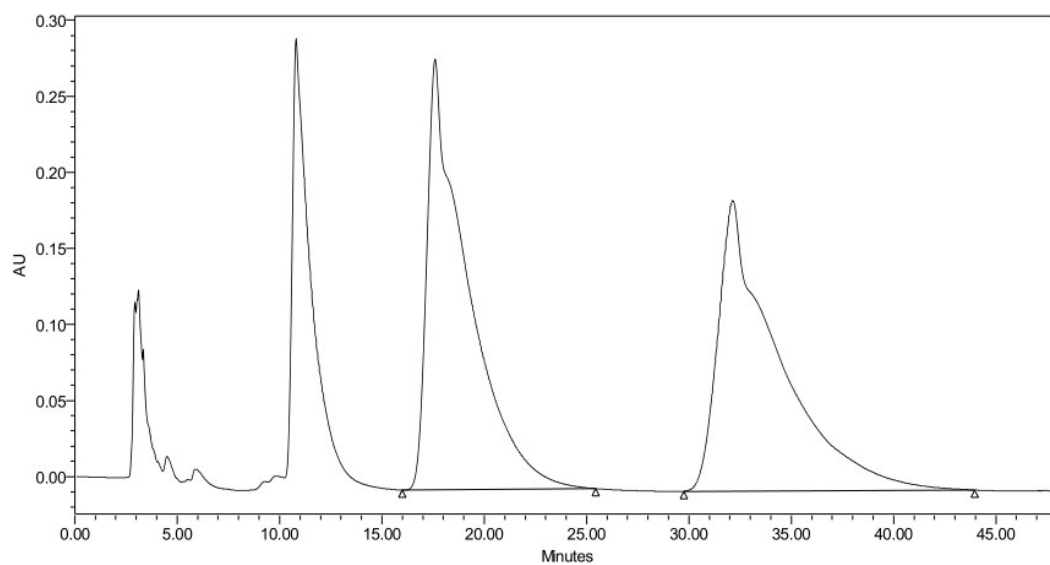

|   | RT    | Area     | % Area | Height |
|---|-------|----------|--------|--------|
| 1 | 17.60 | 38792754 | 49.97  | 282987 |
| 2 | 32.13 | 38837646 | 50.03  | 190954 |

### chiral-3a

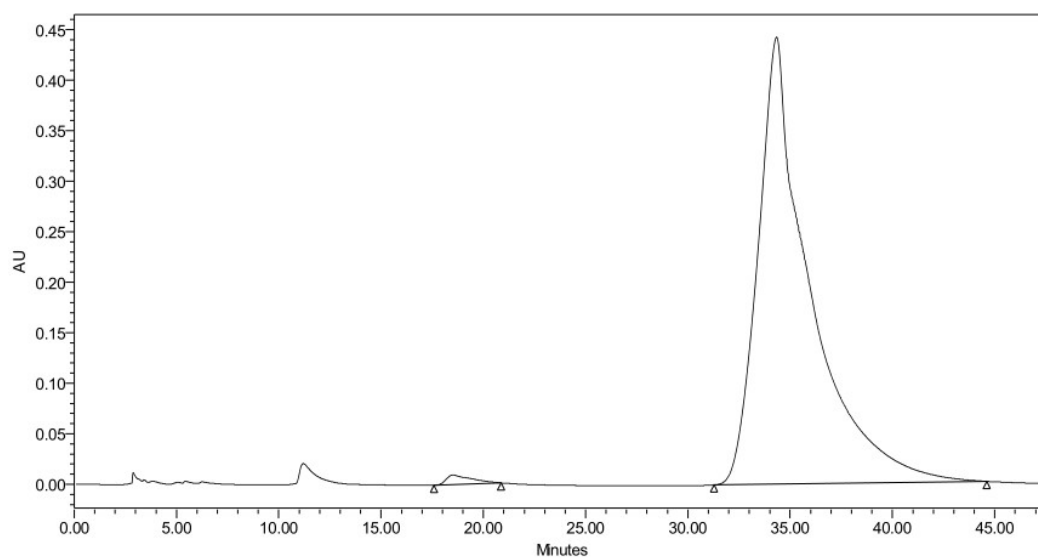

|   | RT    | Area     | % Area | Height |
|---|-------|----------|--------|--------|
| 1 | 18.49 | 808463   | 1.03   | 9560   |
| 2 | 34.34 | 77344054 | 98.97  | 442524 |

### racemic-3b

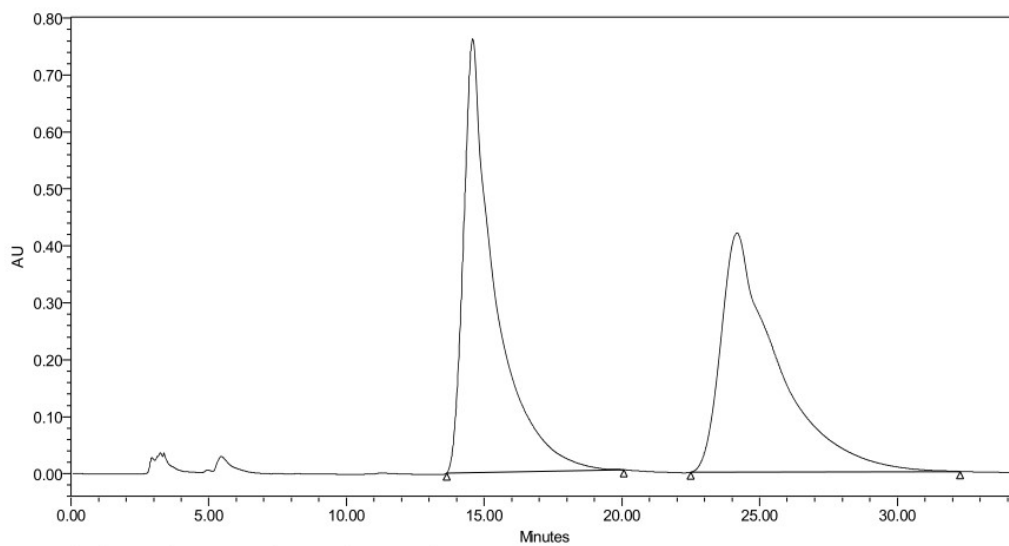

|   | RT    | Area     | % Area | Height |
|---|-------|----------|--------|--------|
| 1 | 14.58 | 59891537 | 50.09  | 760997 |
| 2 | 24.18 | 59681671 | 49.91  | 419713 |

### chiral-3b

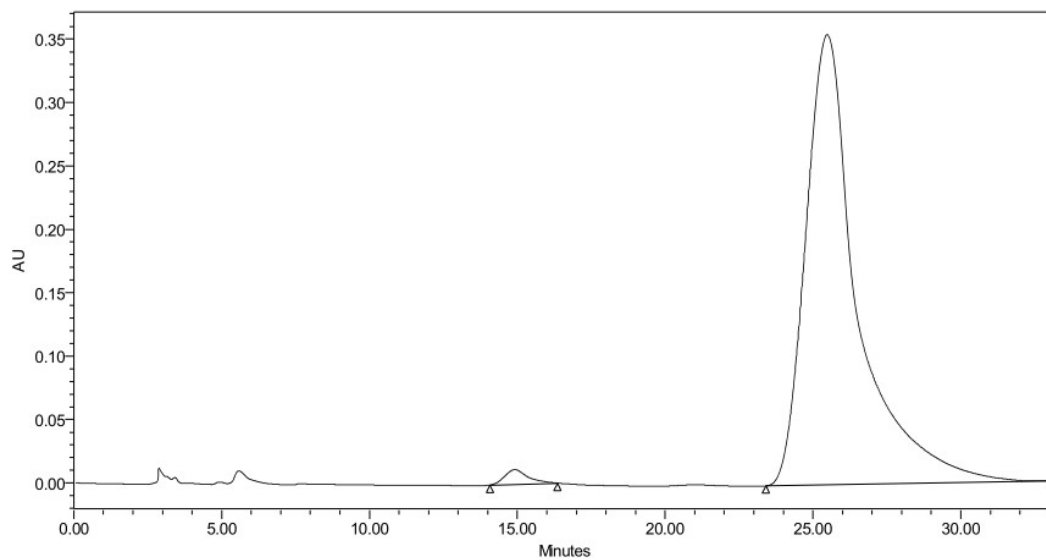

|   | RT    | Area     | % Area | Height |
|---|-------|----------|--------|--------|
| 1 | 14.91 | 631811   | 1.44   | 11622  |
| 2 | 25.48 | 43318220 | 98.56  | 354975 |

### racemic-3c

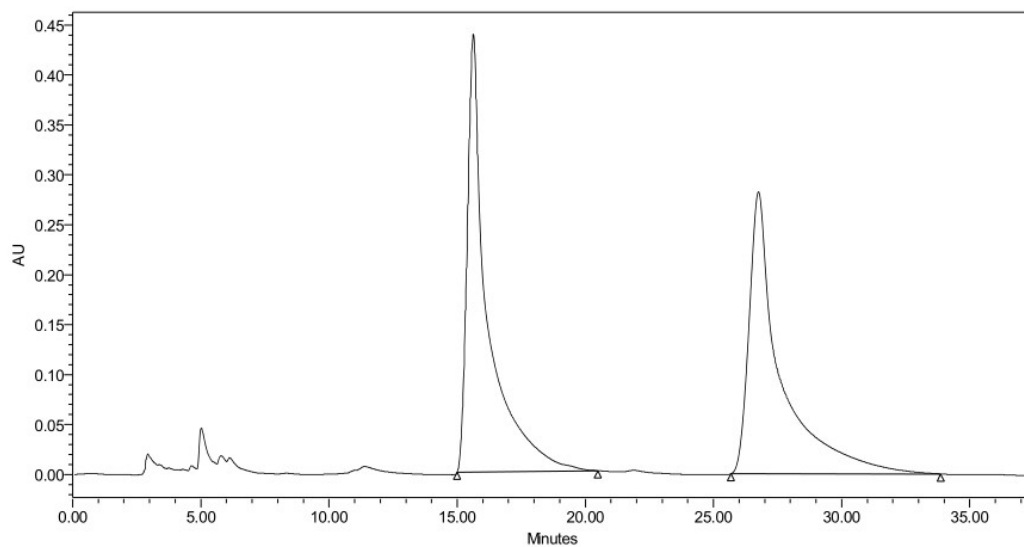

|   | RT    | Area     | % Area | Height |
|---|-------|----------|--------|--------|
| 1 | 15.63 | 24071820 | 50.10  | 438179 |
| 2 | 26.76 | 23975007 | 49.90  | 282385 |

### chiral-3c

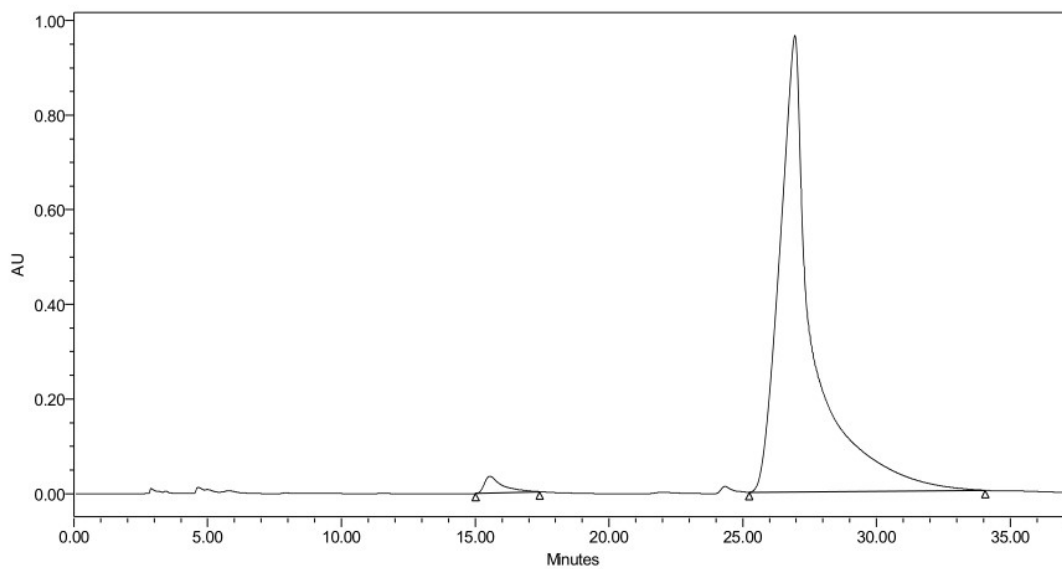

|   | RT    | Area     | % Area | Height |
|---|-------|----------|--------|--------|
| 1 | 15.55 | 1700448  | 1.99   | 35621  |
| 2 | 26.95 | 83835456 | 98.01  | 964568 |

### racemic-3d

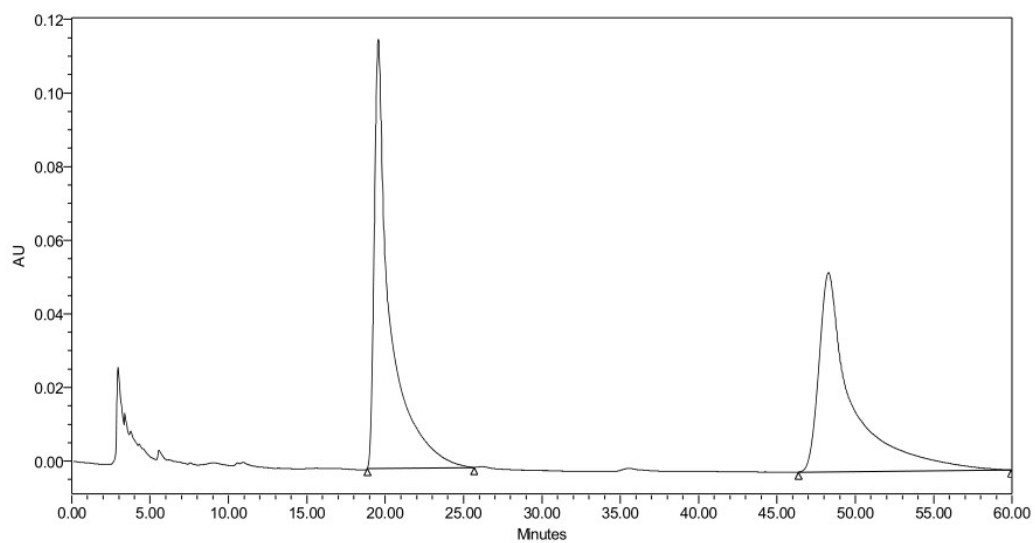

|   | RT    | Area    | % Area | Height |
|---|-------|---------|--------|--------|
| 1 | 19.56 | 7988223 | 50.13  | 116475 |
| 2 | 48.29 | 7945908 | 49.87  | 54117  |

### chiral-3d

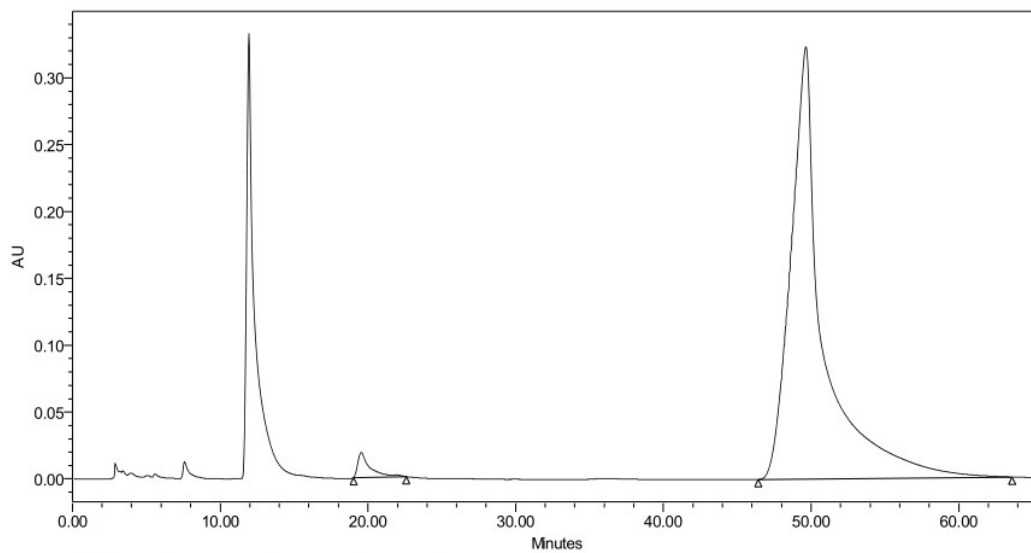

|   | RT    | Area     | % Area | Height |
|---|-------|----------|--------|--------|
| 1 | 19.54 | 1073418  | 2.14   | 18644  |
| 2 | 49.64 | 49095586 | 97.86  | 323303 |

### racemic-3e

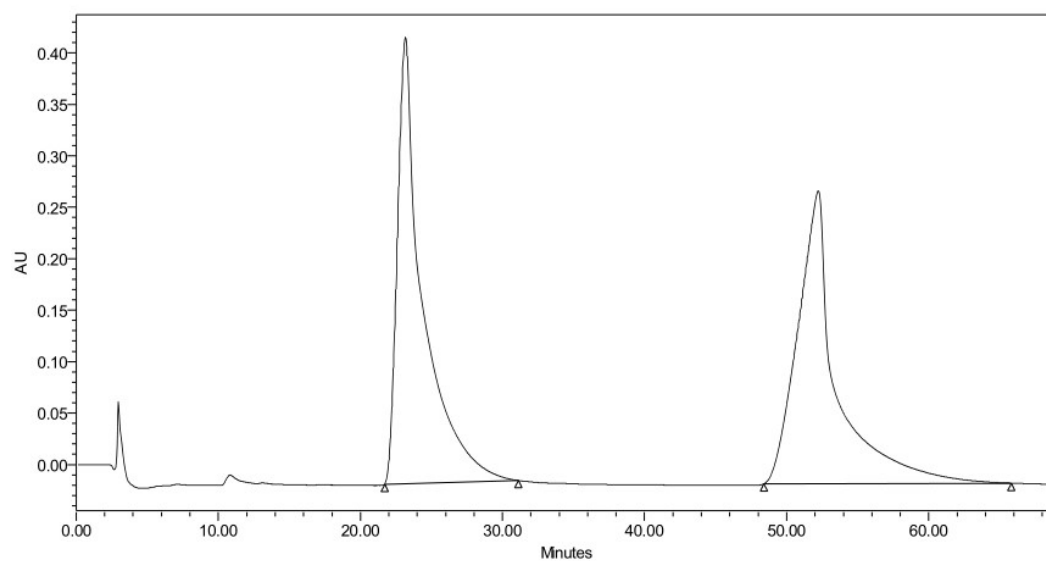

|   | RT    | Area     | % Area | Height |
|---|-------|----------|--------|--------|
| 1 | 23.16 | 53786158 | 50.02  | 433397 |
| 2 | 52.22 | 53740921 | 49.98  | 284500 |

### chiral-3e

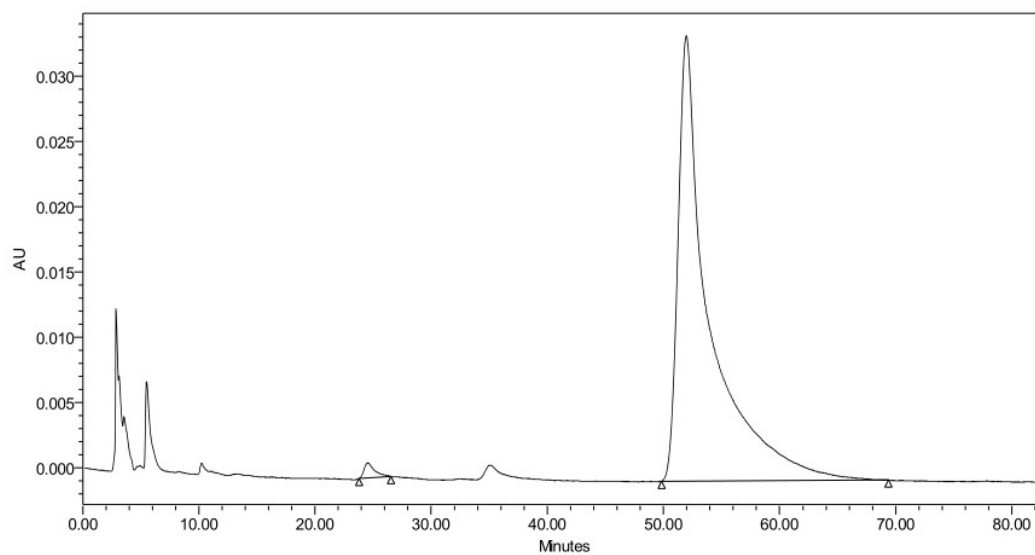

|   | RT    | Area    | % Area | Height |
|---|-------|---------|--------|--------|
| 1 | 24.55 | 73072   | 1.13   | 1148   |
| 2 | 51.96 | 6399626 | 98.87  | 34119  |

### racemic-3f

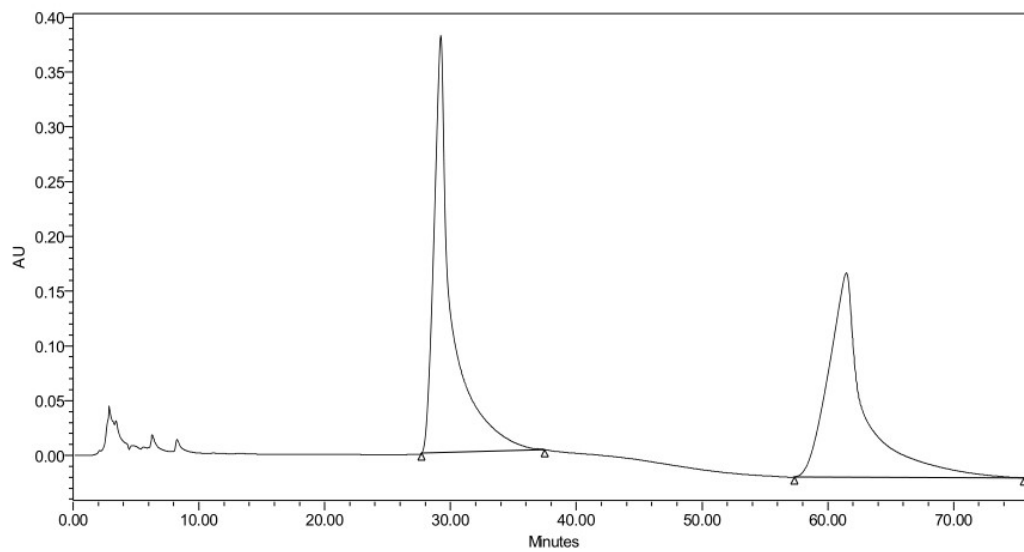

|   | RT    | Area     | % Area | Height |
|---|-------|----------|--------|--------|
| 1 | 29.23 | 37293827 | 50.10  | 380567 |
| 2 | 61.47 | 37151031 | 49.90  | 186543 |

### chiral-3f

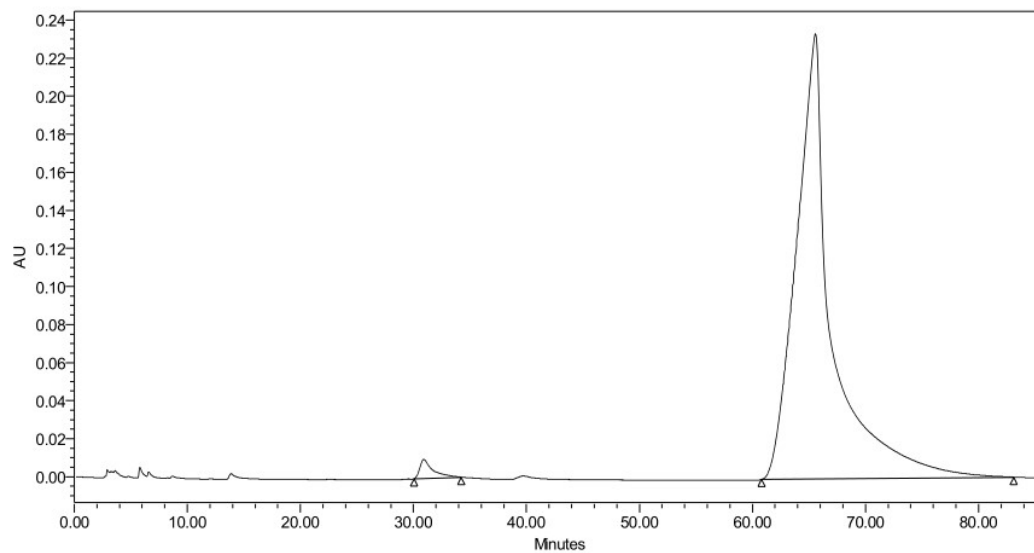

|   | RT    | Area     | % Area | Height |
|---|-------|----------|--------|--------|
| 1 | 30.91 | 810288   | 1.56   | 9964   |
| 2 | 65.56 | 51185245 | 98.44  | 233954 |

### racemic-3g

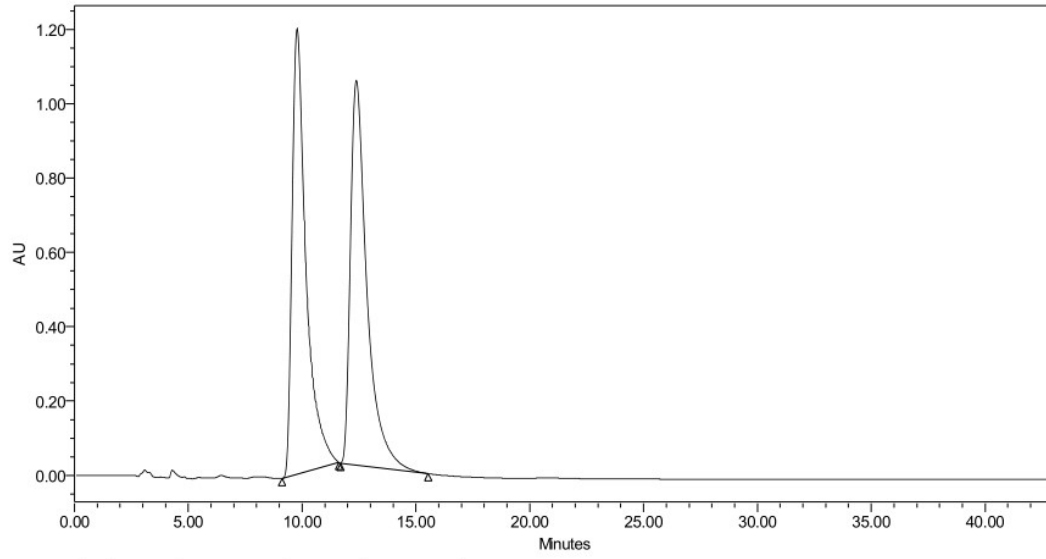

|   | RT    | Area     | % Area | Height  |
|---|-------|----------|--------|---------|
| 1 | 9.78  | 51272316 | 49.46  | 1200061 |
| 2 | 12.38 | 52381793 | 50.54  | 1035688 |

### chiral-3g

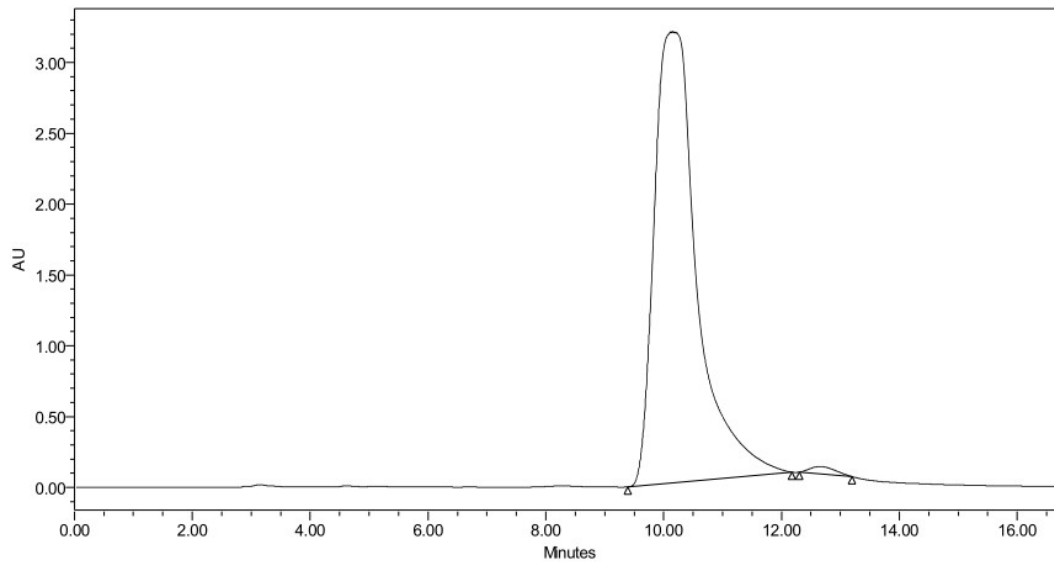

|   | RT    | Area      | % Area | Height  |
|---|-------|-----------|--------|---------|
| 1 | 10.13 | 161465666 | 99.03  | 3185577 |
| 2 | 12.69 | 1576647   | 0.97   | 52764   |

### racemic-3h

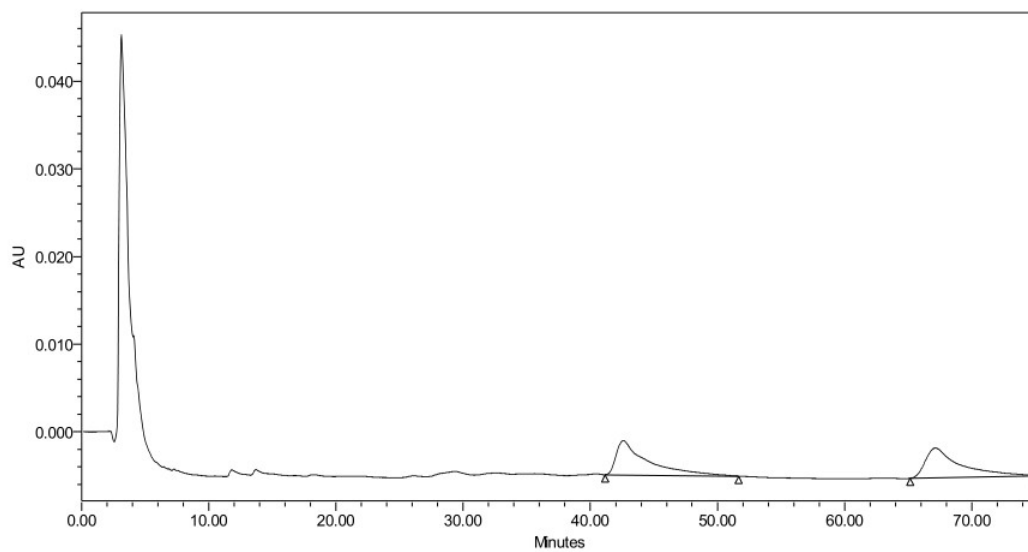

|   | RT    | Area   | % Area | Height |
|---|-------|--------|--------|--------|
| 1 | 42.60 | 669547 | 50.78  | 3905   |
| 2 | 67.10 | 648865 | 49.22  | 3401   |

### chiral-3h

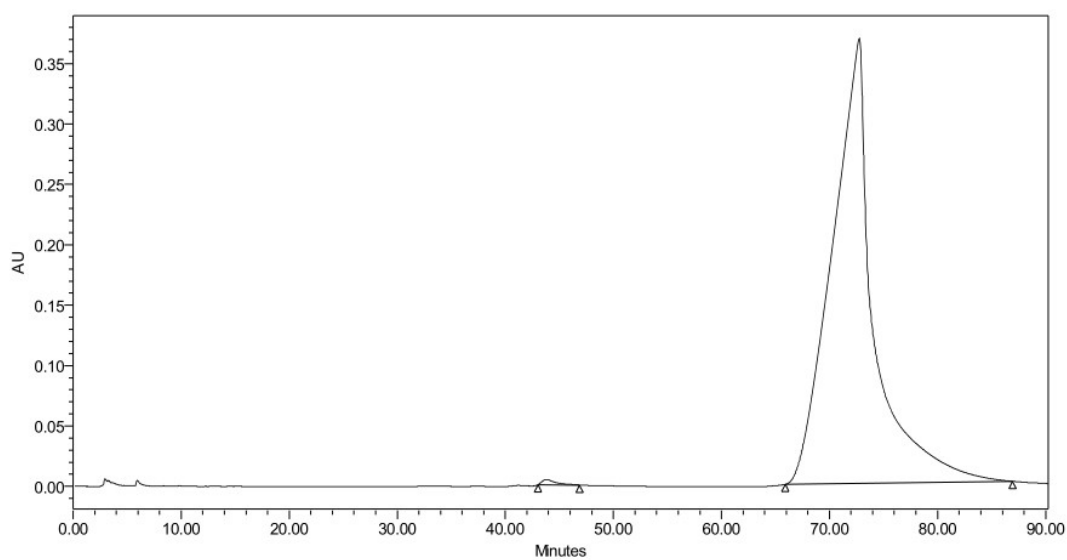

|   | RT    | Area     | % Area | Height |
|---|-------|----------|--------|--------|
| 1 | 43.80 | 369865   | 0.37   | 4246   |
| 2 | 72.77 | 99079474 | 99.63  | 368592 |



### racemic-3i

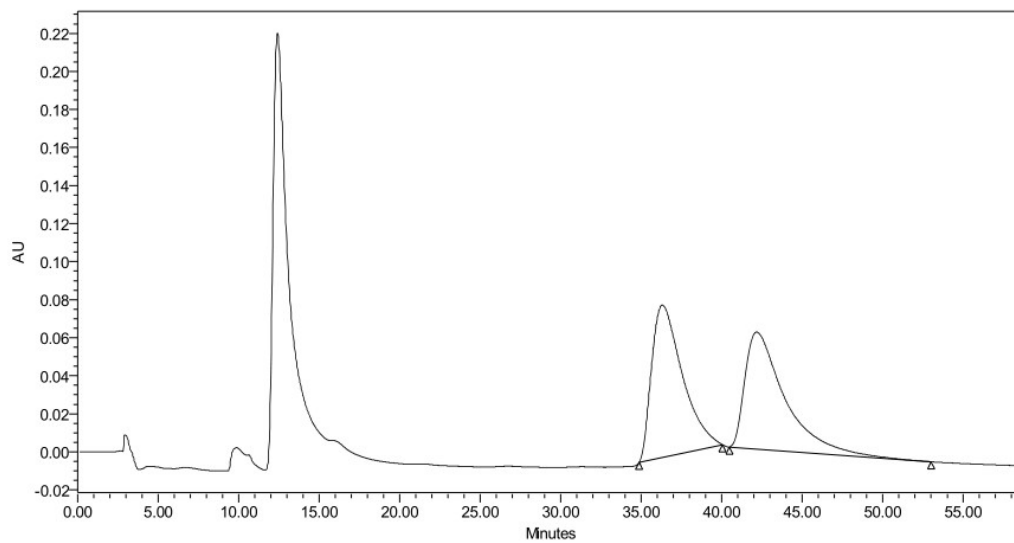

|   | RT    | Area     | % Area | Height |
|---|-------|----------|--------|--------|
| 1 | 36.30 | 10653240 | 50.13  | 80221  |
| 2 | 42.17 | 10597094 | 49.87  | 61441  |

### chiral-3i

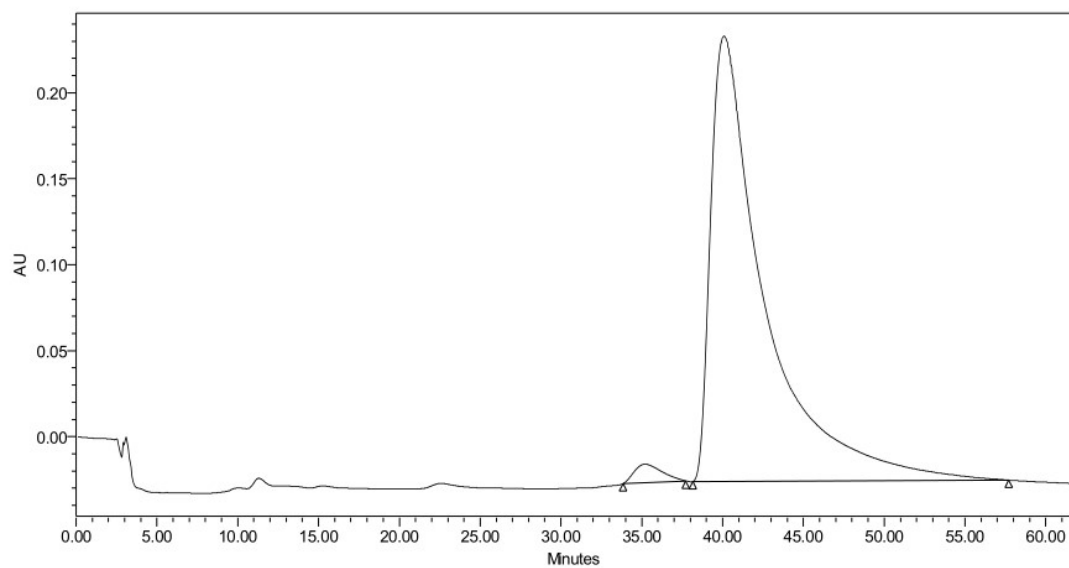

|   | RT    | Area     | % Area | Height |
|---|-------|----------|--------|--------|
| 1 | 35.19 | 1275354  | 2.09   | 10673  |
| 2 | 40.09 | 59787686 | 97.91  | 258851 |

### racemic-3j

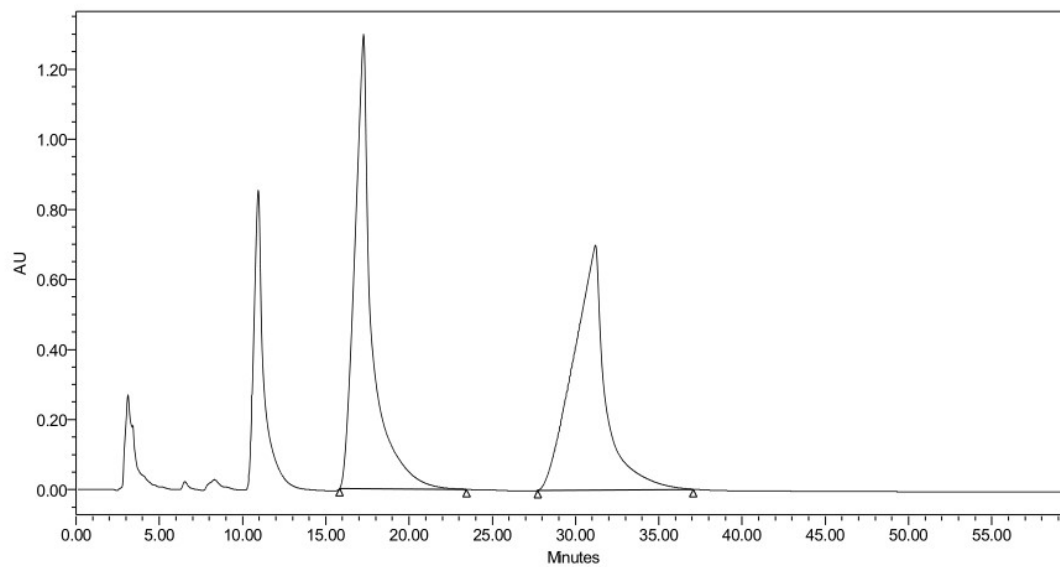

|   | RT    | Area     | % Area | Height  |
|---|-------|----------|--------|---------|
| 1 | 17.27 | 93114697 | 49.85  | 1296543 |
| 2 | 31.19 | 93659365 | 50.15  | 698957  |

### chiral-3j

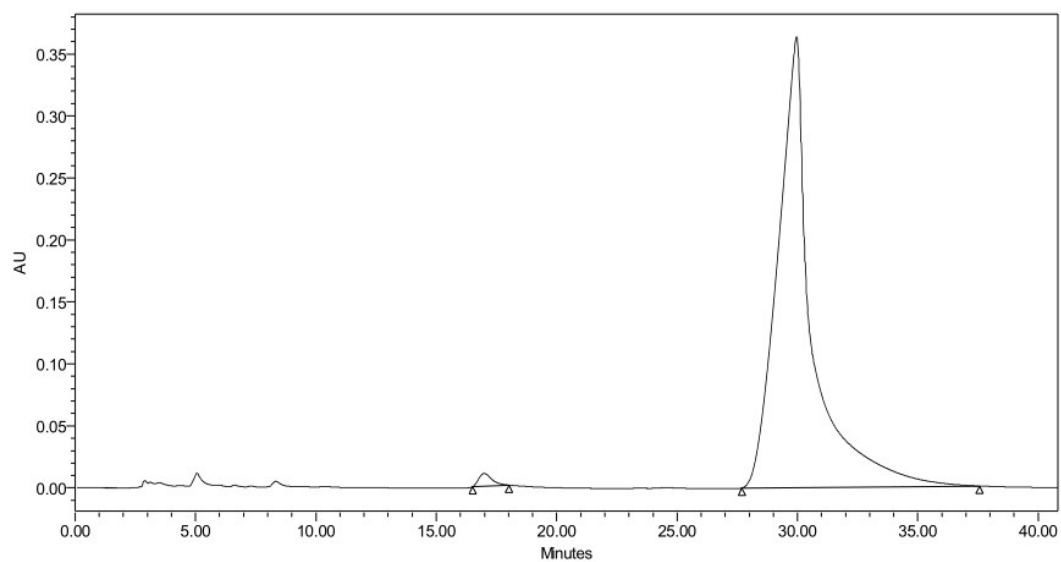

|   | RT    | Area     | % Area | Height |
|---|-------|----------|--------|--------|
| 1 | 16.99 | 393860   | 1.08   | 10229  |
| 2 | 29.97 | 35944416 | 98.92  | 363606 |

### racemic-3k

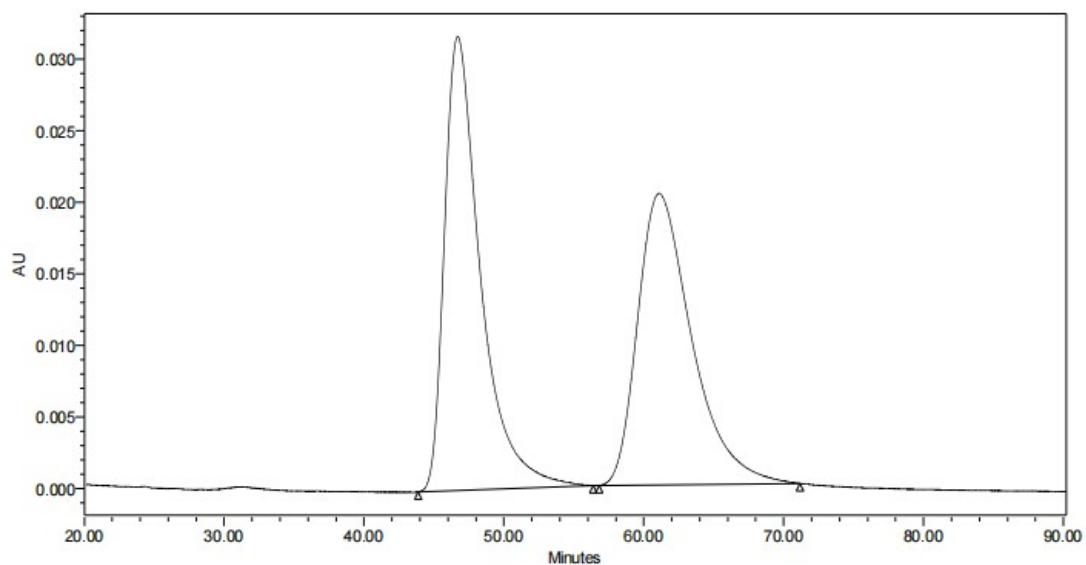

|   | RT    | Area    | % Area | Height |
|---|-------|---------|--------|--------|
| 1 | 46.69 | 5672452 | 50.98  | 31707  |
| 2 | 61.10 | 5453900 | 49.02  | 20360  |

### chiral-3k

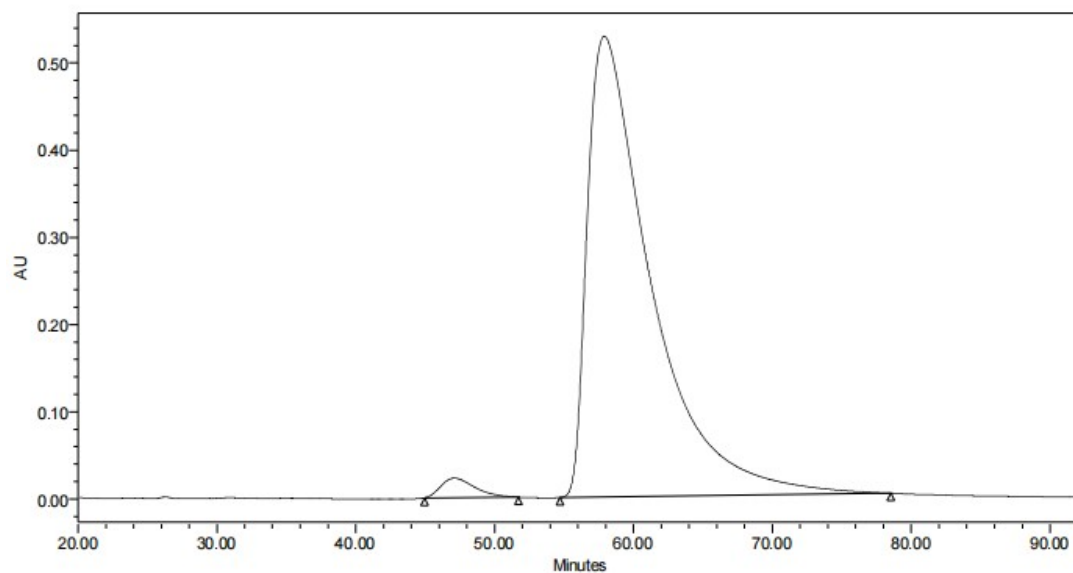

|   | RT    | Area      | % Area | Height |
|---|-------|-----------|--------|--------|
| 1 | 47.09 | 3796293   | 2.20   | 22364  |
| 2 | 57.91 | 169063944 | 97.80  | 528339 |

### racemic-3l

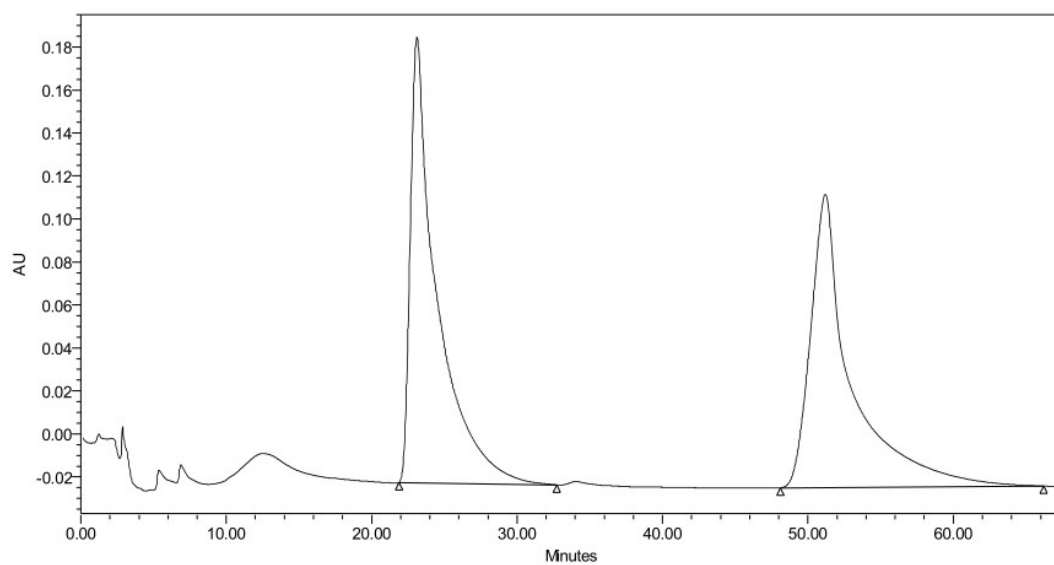

|   | RT    | Area     | % Area | Height |
|---|-------|----------|--------|--------|
| 1 | 23.11 | 26374984 | 50.00  | 207102 |
| 2 | 51.19 | 26379485 | 50.00  | 136382 |

### chiral-3l

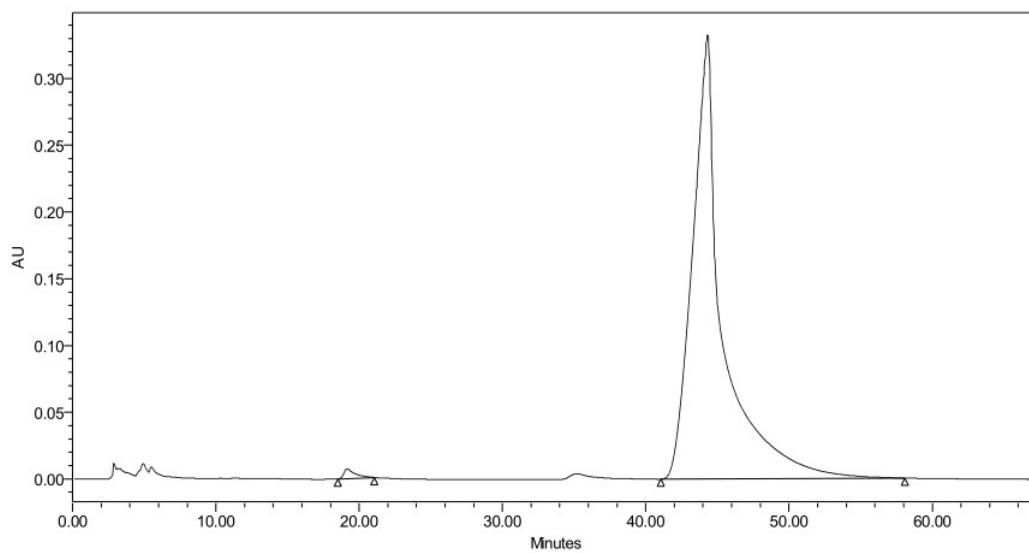

|   | RT    | Area     | % Area | Height |
|---|-------|----------|--------|--------|
| 1 | 19.18 | 413027   | 0.84   | 7498   |
| 2 | 44.32 | 48472129 | 99.16  | 332622 |

### racemic-3m

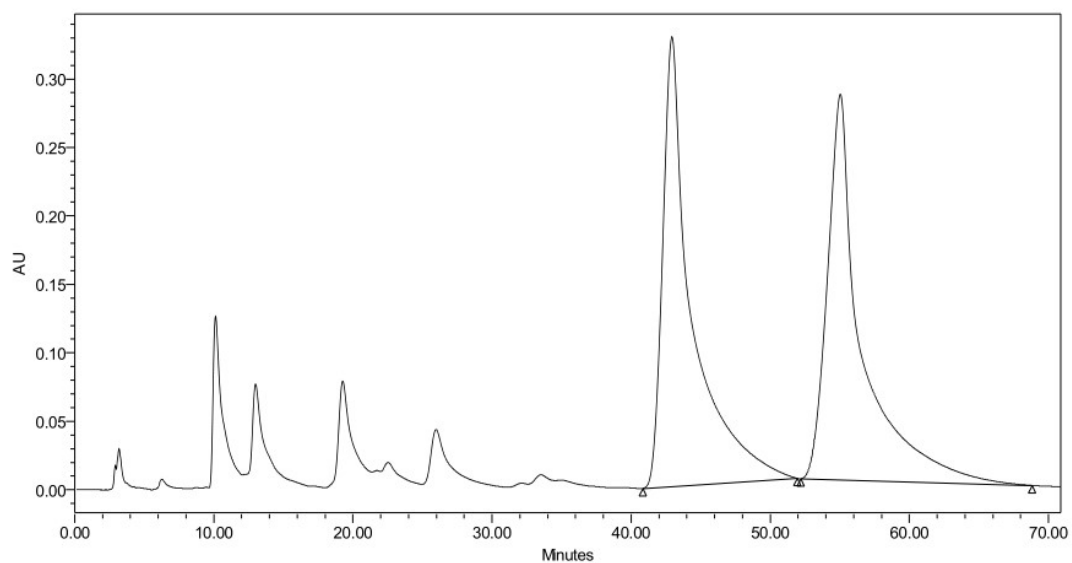

|   | RT    | Area     | % Area | Height |
|---|-------|----------|--------|--------|
| 1 | 42.93 | 48244367 | 50.05  | 328450 |
| 2 | 55.03 | 48147778 | 49.95  | 281660 |

### chiral-3m

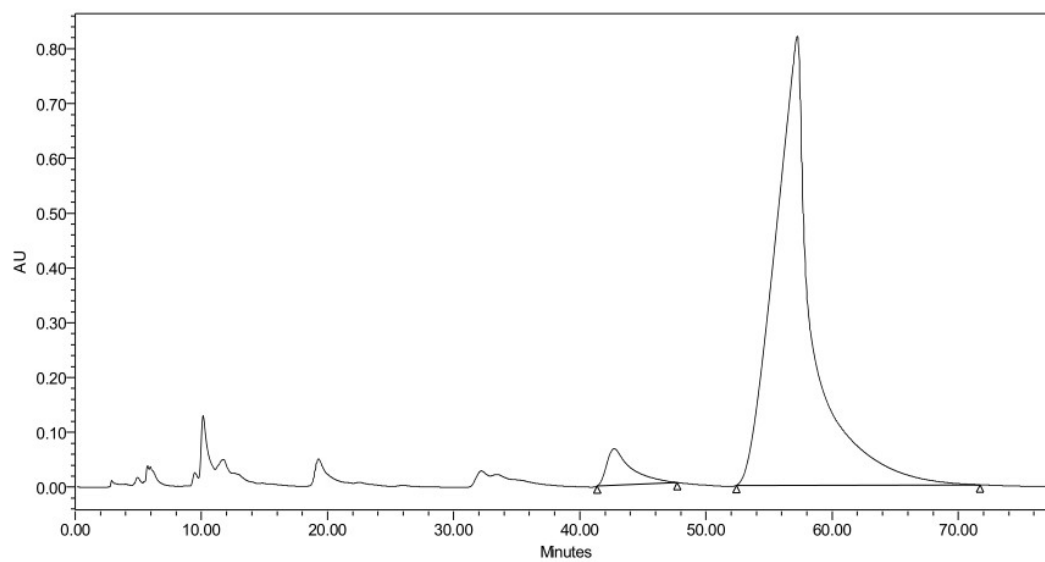

|   | RT    | Area      | % Area | Height |
|---|-------|-----------|--------|--------|
| 1 | 42.71 | 8961139   | 4.95   | 66750  |
| 2 | 57.24 | 172090558 | 95.05  | 819254 |

### racemic-3n

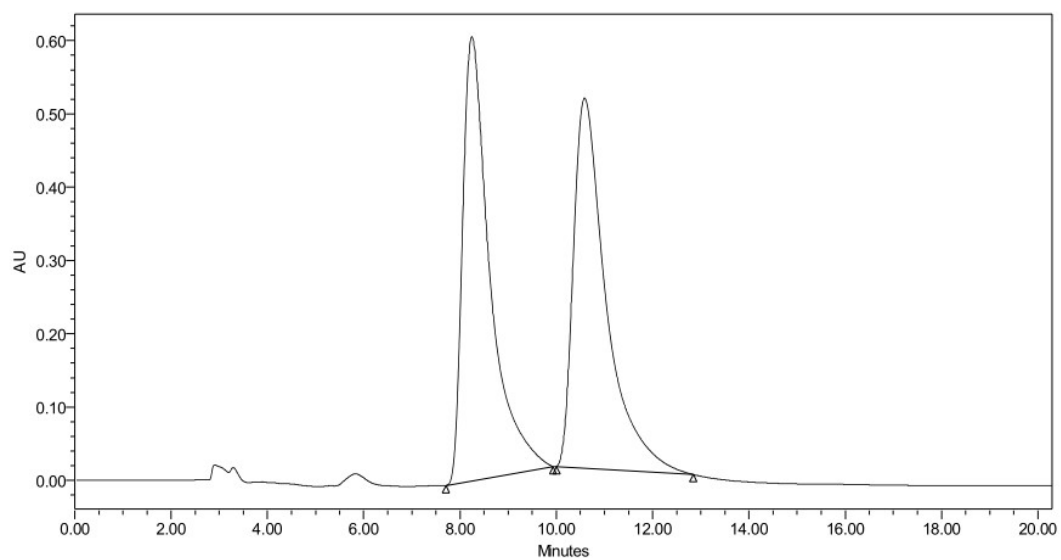

|   | RT    | Area     | % Area | Height |
|---|-------|----------|--------|--------|
| 1 | 8.25  | 23830678 | 49.94  | 605751 |
| 2 | 10.59 | 23890581 | 50.06  | 504813 |

### chiral-3n

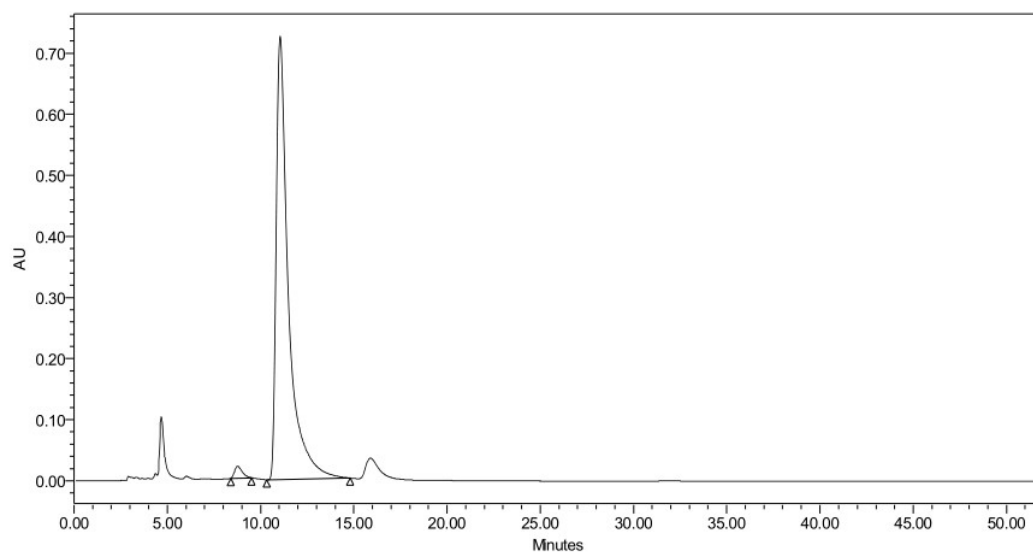

|   | RT    | Area     | % Area | Height |
|---|-------|----------|--------|--------|
| 1 | 8.77  | 549507   | 1.63   | 19286  |
| 2 | 11.05 | 33214965 | 98.37  | 725477 |

### racemic-3o

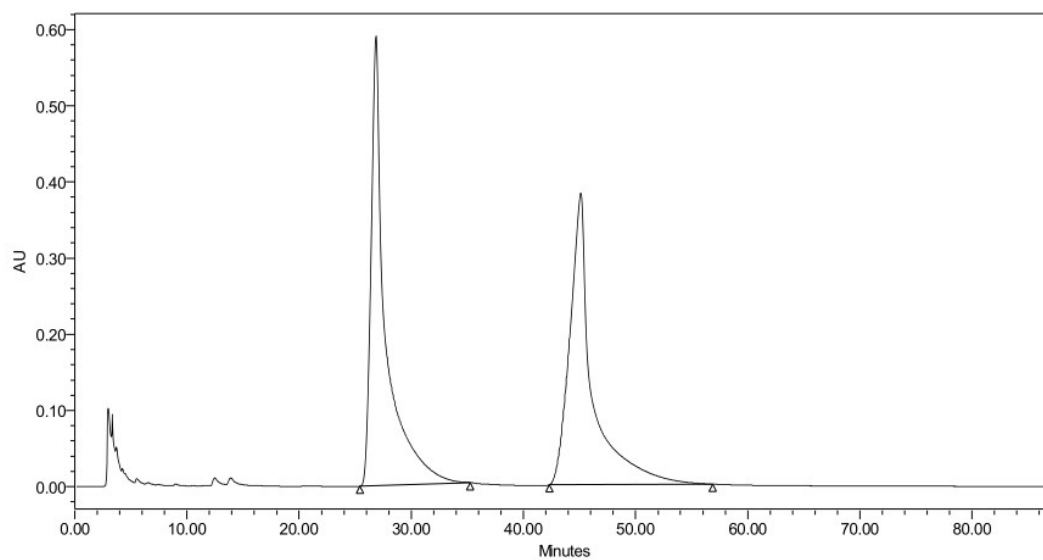

|   | RT    | Area     | % Area | Height |
|---|-------|----------|--------|--------|
| 1 | 26.86 | 53229257 | 49.96  | 590122 |
| 2 | 45.10 | 53308742 | 50.04  | 382759 |

### chiral-3o

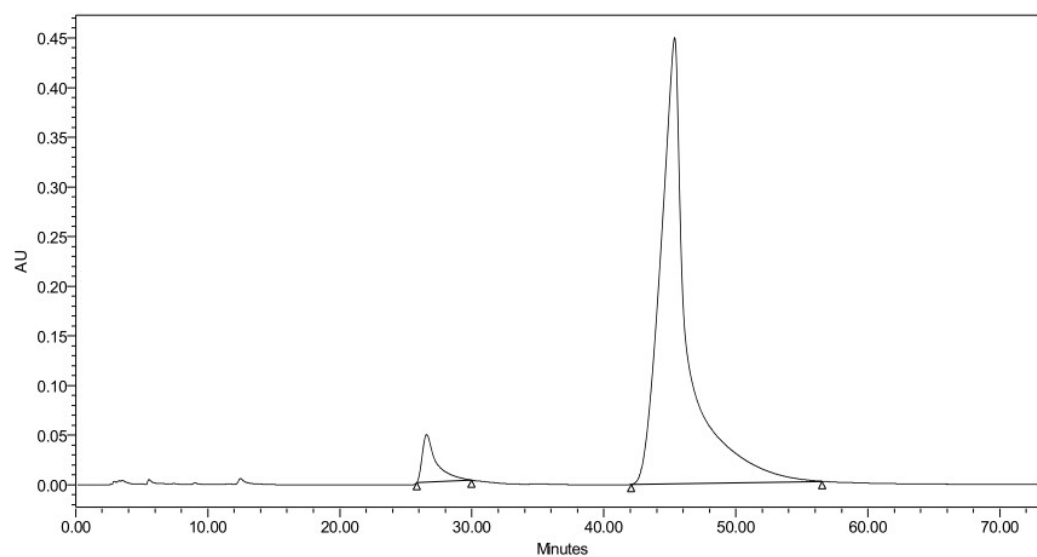

|   | RT    | Area     | % Area | Height |
|---|-------|----------|--------|--------|
| 1 | 26.57 | 3556334  | 5.23   | 47717  |
| 2 | 45.36 | 64464966 | 94.77  | 449147 |





### racemic-4b

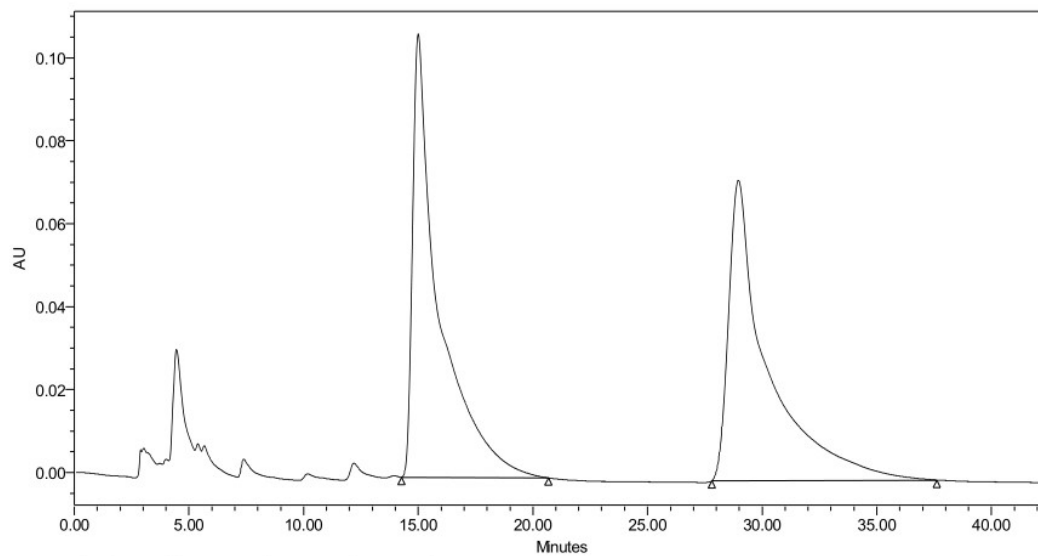

|   | RT    | Area    | % Area | Height |
|---|-------|---------|--------|--------|
| 1 | 14.99 | 8488614 | 49.97  | 106896 |
| 2 | 28.96 | 8498589 | 50.03  | 72403  |

### chiral-4b

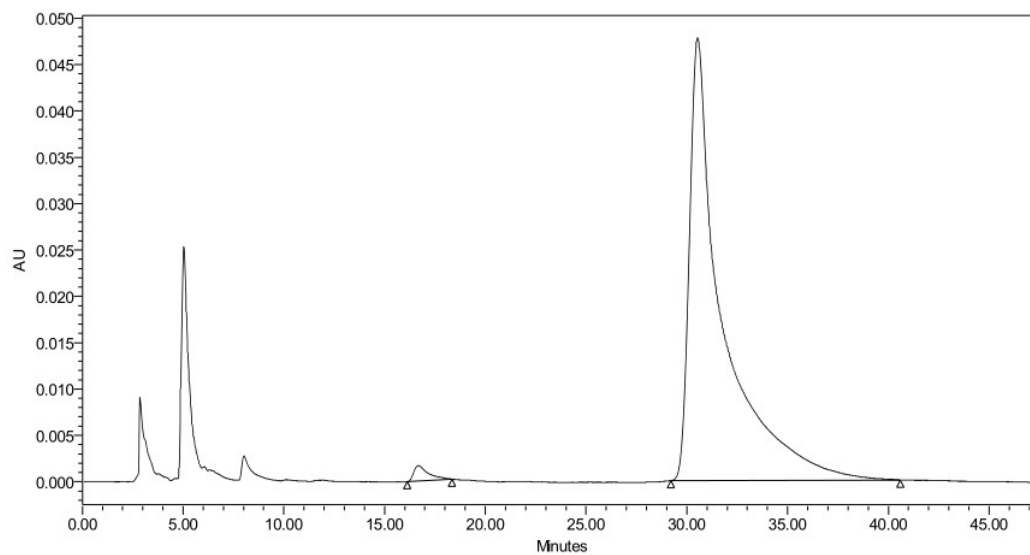

|   | RT    | Area    | % Area | Height |
|---|-------|---------|--------|--------|
| 1 | 16.67 | 84168   | 1.53   | 1682   |
| 2 | 30.53 | 5415418 | 98.47  | 47757  |

### racemic-4c

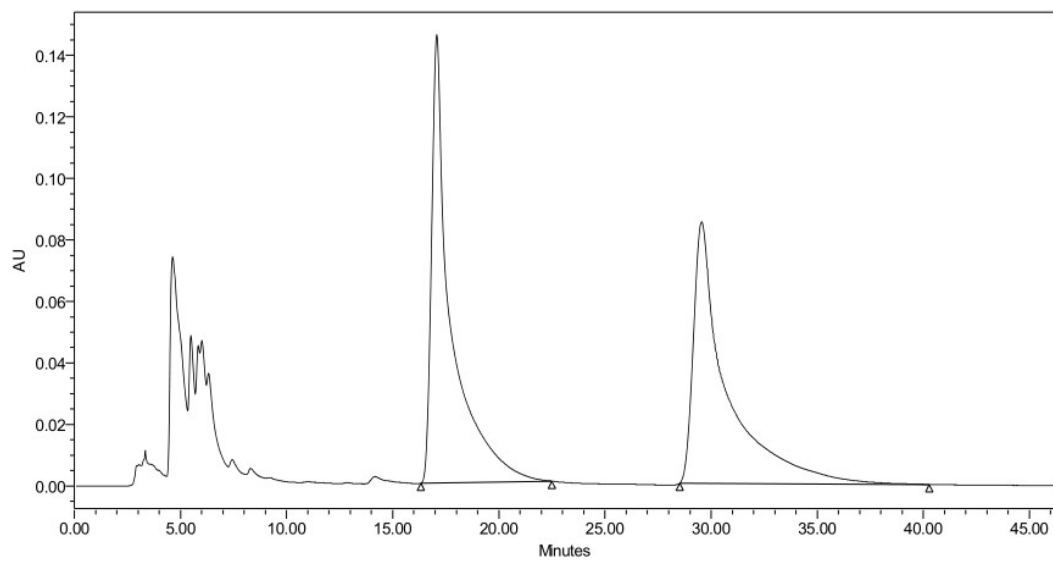

|   | RT    | Area    | % Area | Height |
|---|-------|---------|--------|--------|
| 1 | 17.07 | 9287910 | 50.20  | 145672 |
| 2 | 29.56 | 9212575 | 49.80  | 85091  |

### chiral-4c

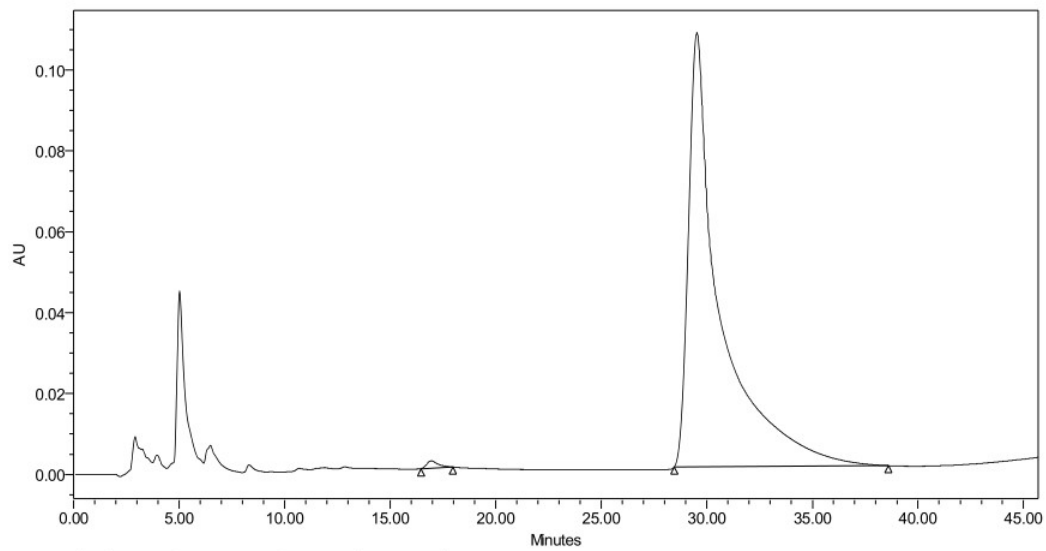

|   | RT    | Area     | % Area | Height |
|---|-------|----------|--------|--------|
| 1 | 16.94 | 69533    | 0.62   | 1828   |
| 2 | 29.53 | 11157913 | 99.38  | 107355 |

### racemic-4d

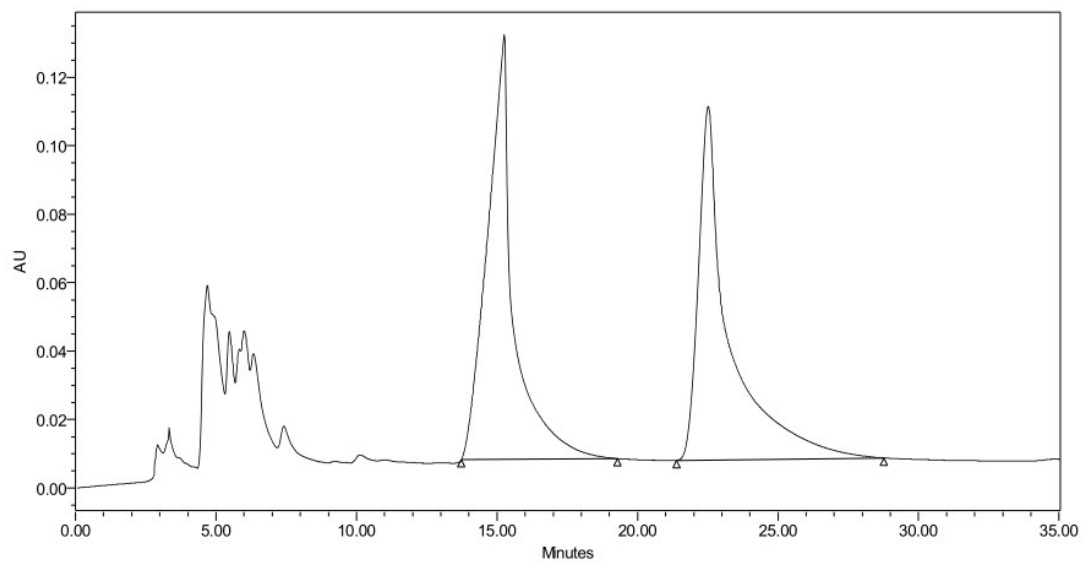

|   | RT    | Area    | % Area | Height |
|---|-------|---------|--------|--------|
| 1 | 15.26 | 8046920 | 50.54  | 123998 |
| 2 | 22.52 | 7876469 | 49.46  | 103300 |

### chiral-4d

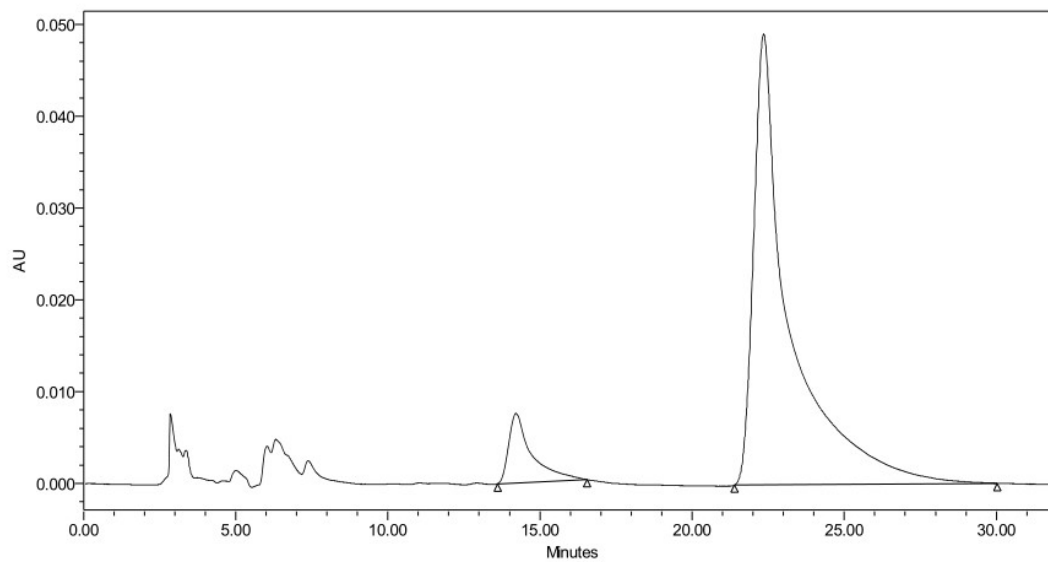

|   | RT    | Area    | % Area | Height |
|---|-------|---------|--------|--------|
| 1 | 14.21 | 398223  | 8.90   | 7580   |
| 2 | 22.35 | 4074841 | 91.10  | 49122  |

### racemic-4e

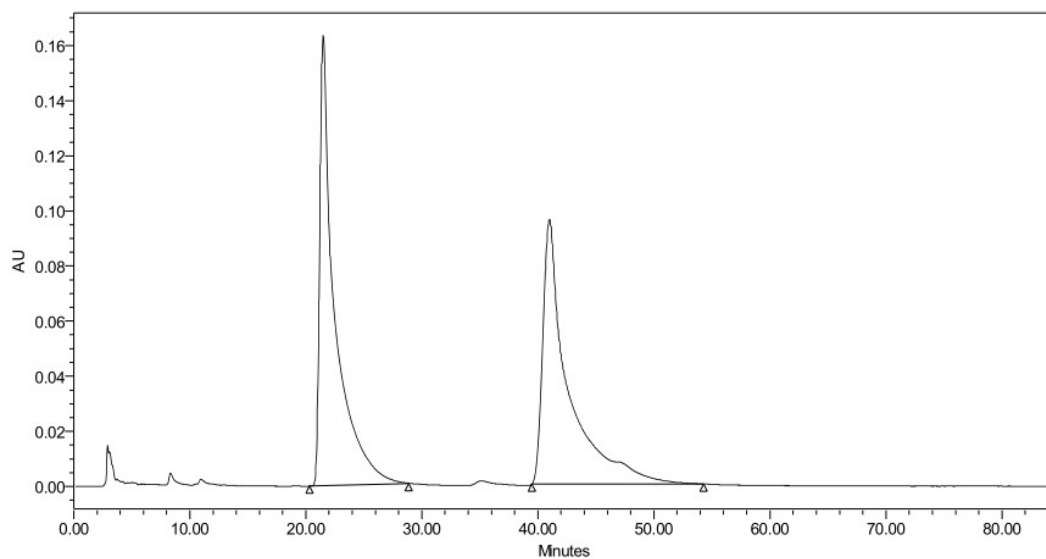

|   | RT    | Area     | % Area | Height |
|---|-------|----------|--------|--------|
| 1 | 21.48 | 14622932 | 50.10  | 163353 |
| 2 | 40.99 | 14564252 | 49.90  | 96040  |

### chiral-4e

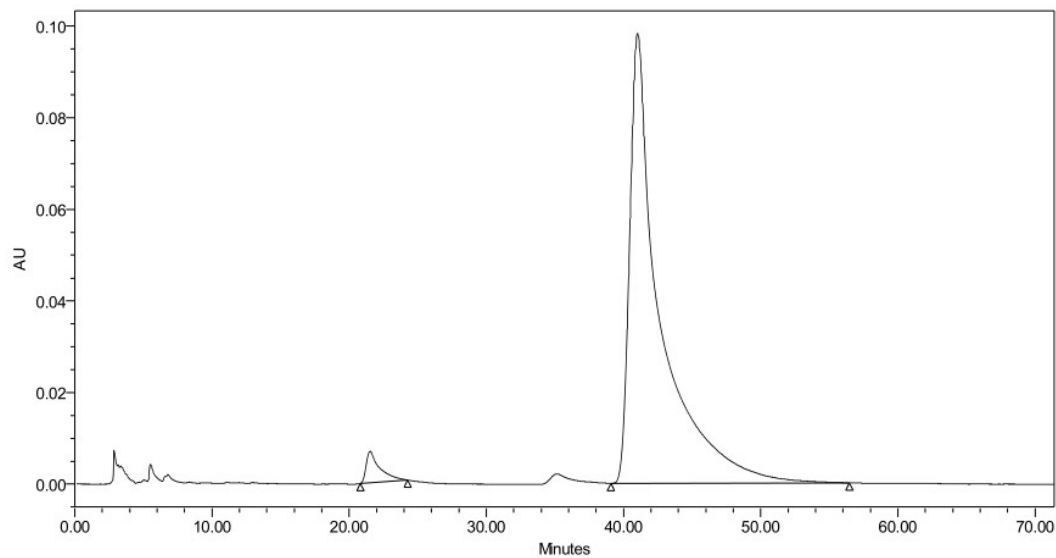

|   | RT    | Area     | % Area | Height |
|---|-------|----------|--------|--------|
| 1 | 21.53 | 477062   | 3.09   | 6884   |
| 2 | 41.02 | 14974299 | 96.91  | 98180  |

### racemic-4f

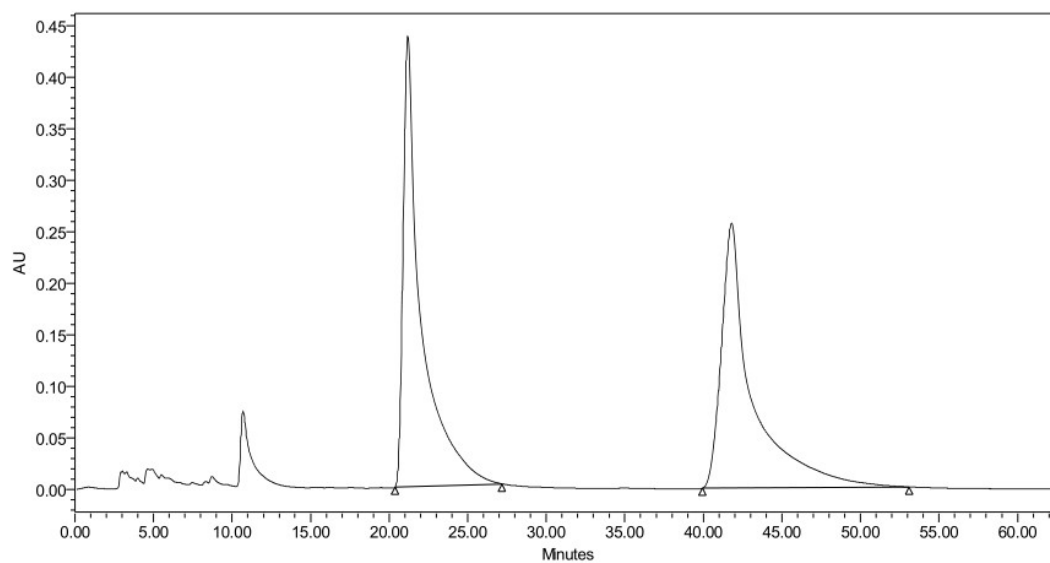

|   | RT    | Area     | % Area | Height |
|---|-------|----------|--------|--------|
| 1 | 21.18 | 34770563 | 49.97  | 437073 |
| 2 | 41.79 | 34812029 | 50.03  | 256910 |

### chiral-4f

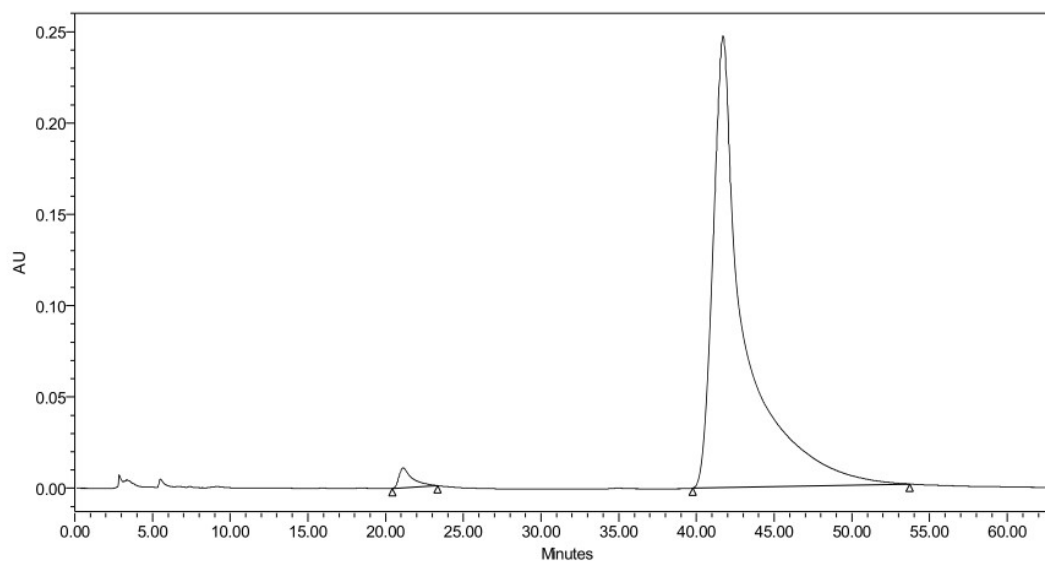

|   | RT    | Area     | % Area | Height |
|---|-------|----------|--------|--------|
| 1 | 21.13 | 663631   | 1.89   | 10958  |
| 2 | 41.70 | 34425872 | 98.11  | 247186 |

### racemic-4g

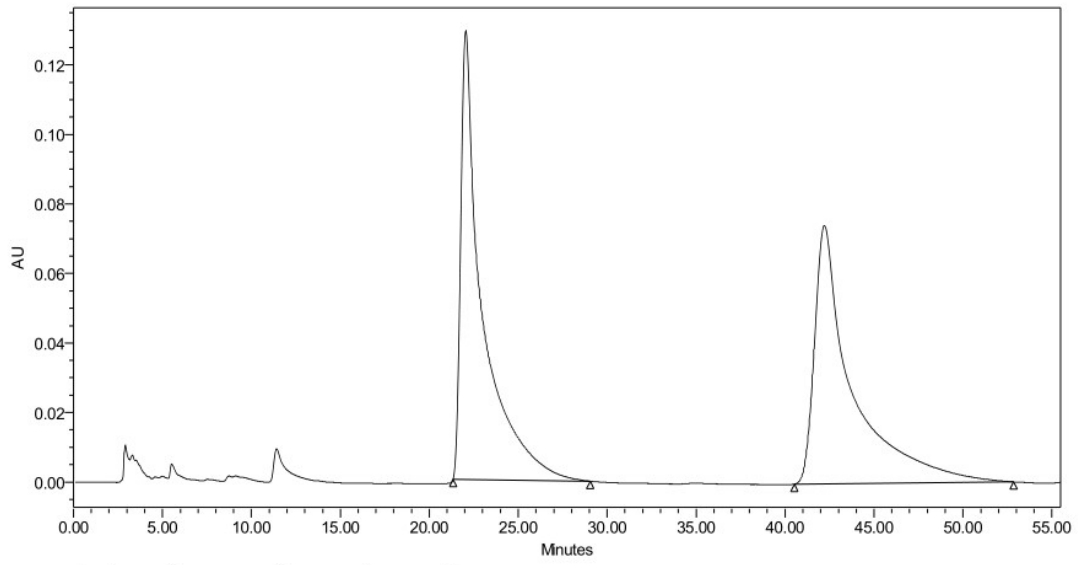

|   | RT    | Area     | % Area | Height |
|---|-------|----------|--------|--------|
| 1 | 22.06 | 10861425 | 49.98  | 129212 |
| 2 | 42.20 | 10869827 | 50.02  | 74372  |

### chiral-4g

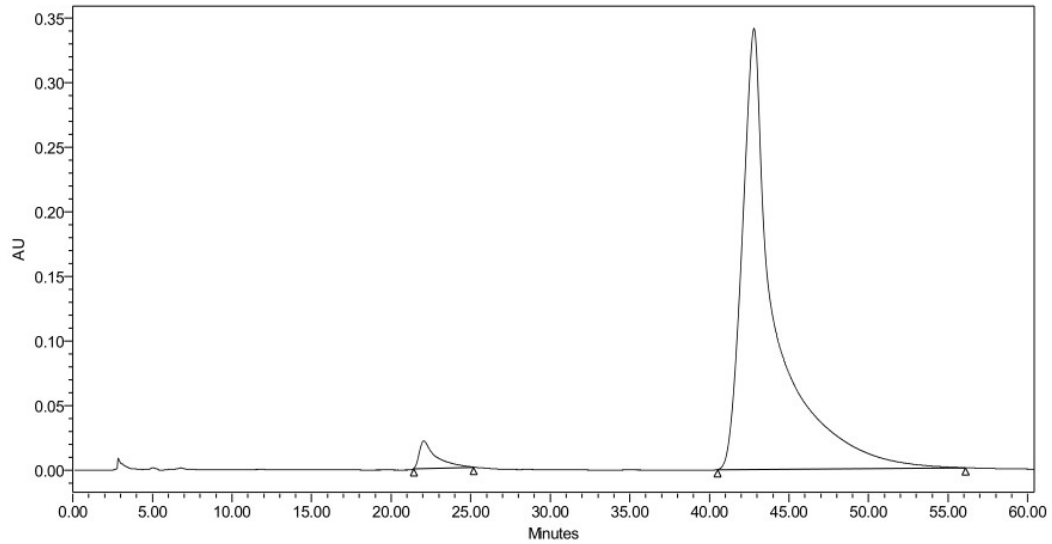

|   | RT    | Area     | % Area | Height |
|---|-------|----------|--------|--------|
| 1 | 22.05 | 1552742  | 3.05   | 21301  |
| 2 | 42.81 | 49308616 | 96.95  | 341514 |

## racemic-4h

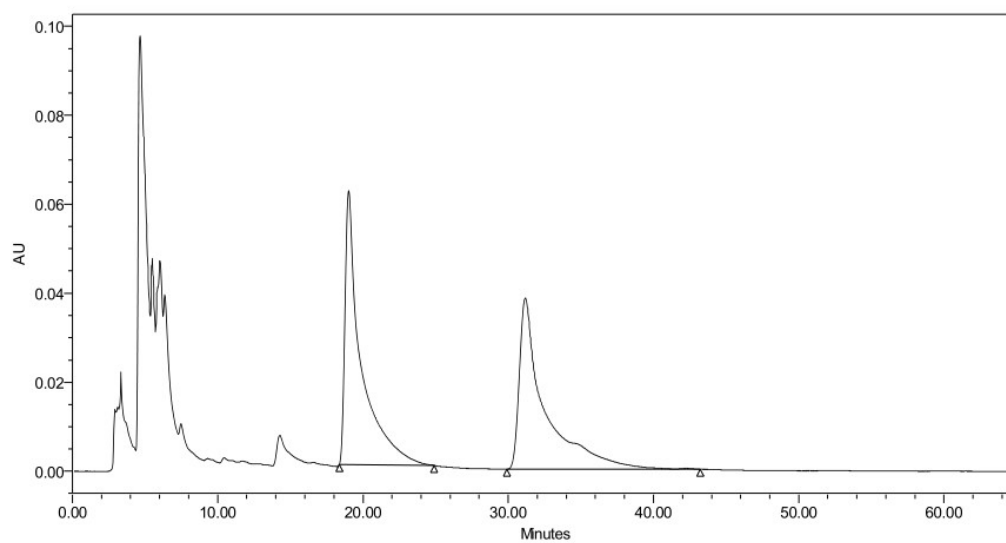

|   | RT    | Area    | % Area | Height |
|---|-------|---------|--------|--------|
| 1 | 19.02 | 4716822 | 50.24  | 61595  |
| 2 | 31.18 | 4671893 | 49.76  | 38519  |

## chiral-4h

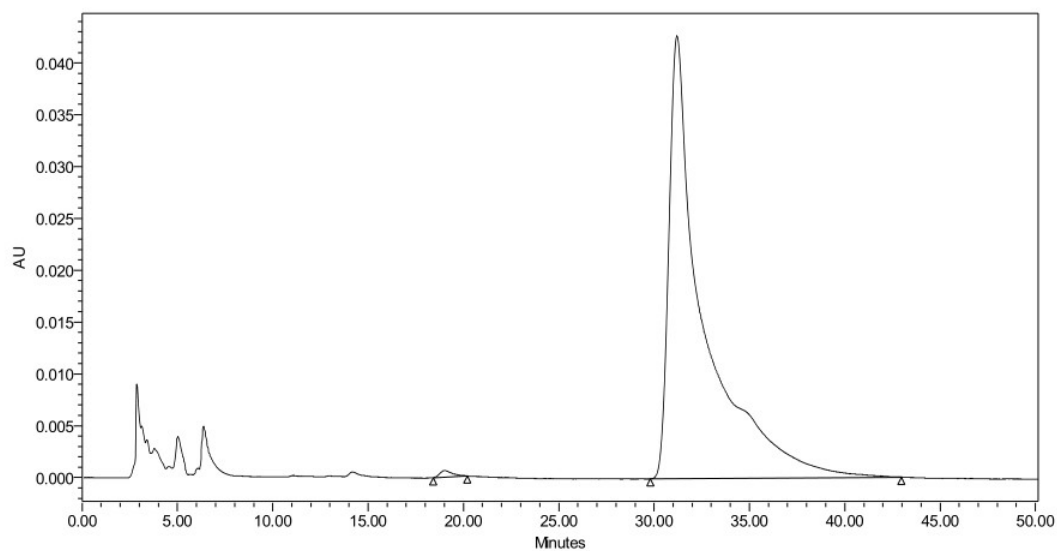

|   | RT    | Area    | % Area | Height |
|---|-------|---------|--------|--------|
| 1 | 18.97 | 29075   | 0.54   | 631    |
| 2 | 31.19 | 5351134 | 99.46  | 42734  |

### racemic-4i

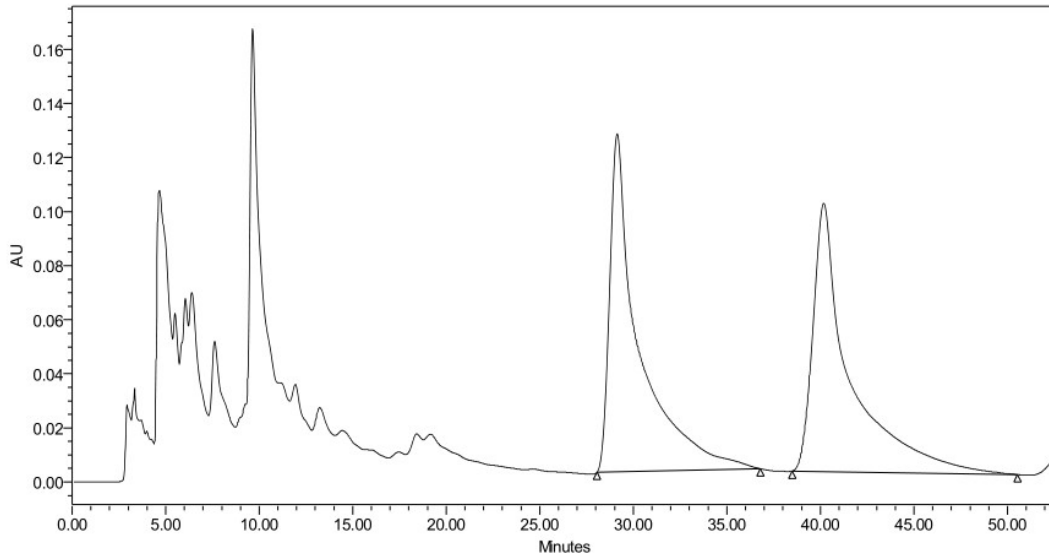

|   | RT    | Area     | % Area | Height |
|---|-------|----------|--------|--------|
| 1 | 29.14 | 13557413 | 49.93  | 125006 |
| 2 | 40.17 | 13594524 | 50.07  | 99221  |

### chiral-4i

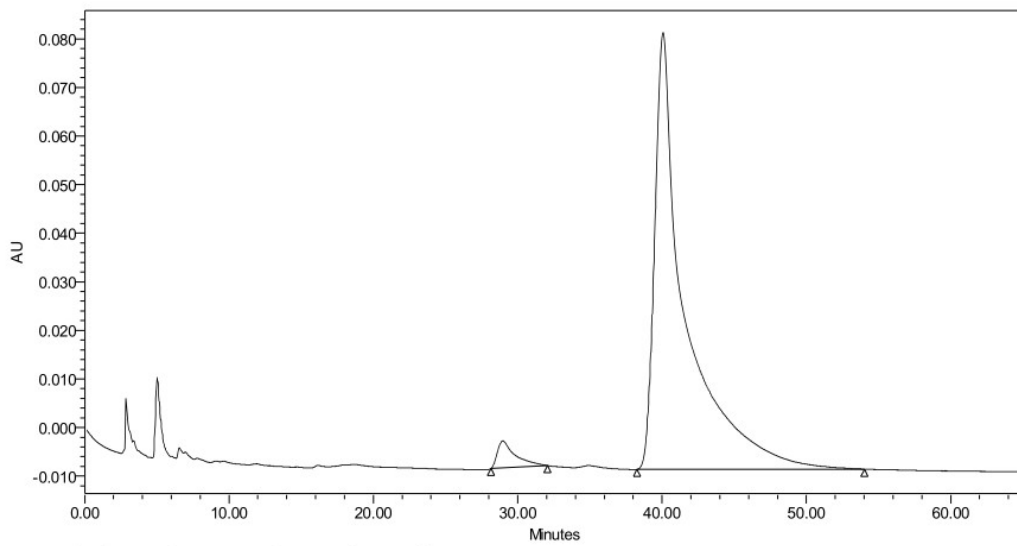

|   | RT    | Area     | % Area | Height |
|---|-------|----------|--------|--------|
| 1 | 28.97 | 477034   | 3.49   | 5561   |
| 2 | 40.08 | 13187577 | 96.51  | 89924  |



### racemic-4j

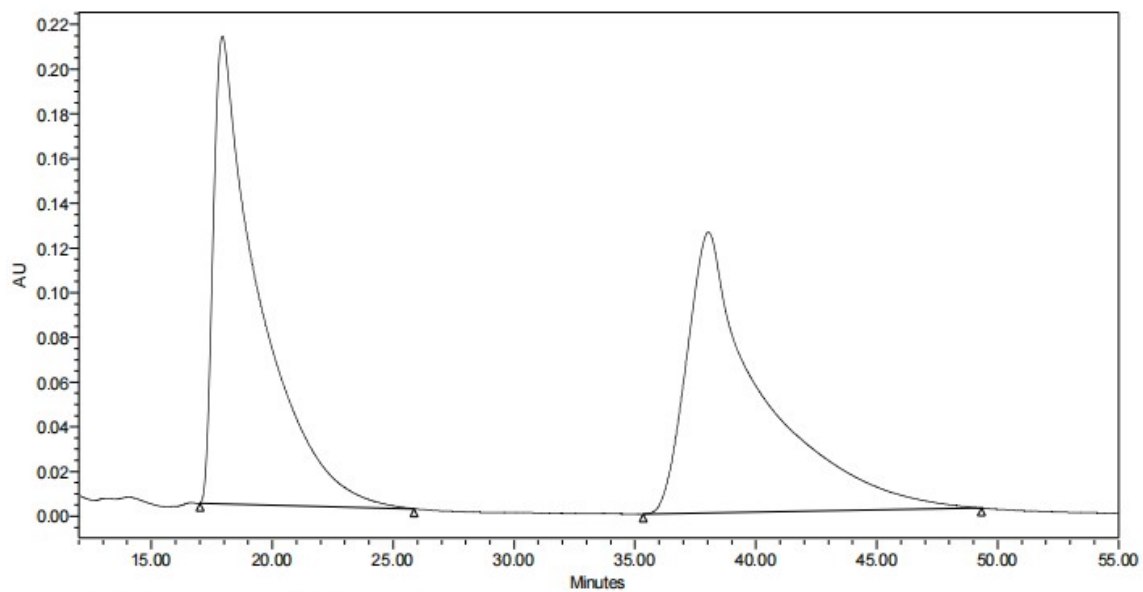

|   | RT    | Area     | % Area | Height |
|---|-------|----------|--------|--------|
| 1 | 17.94 | 27331423 | 50.04  | 209132 |
| 2 | 38.04 | 27292685 | 49.96  | 125581 |

### chiral-4j

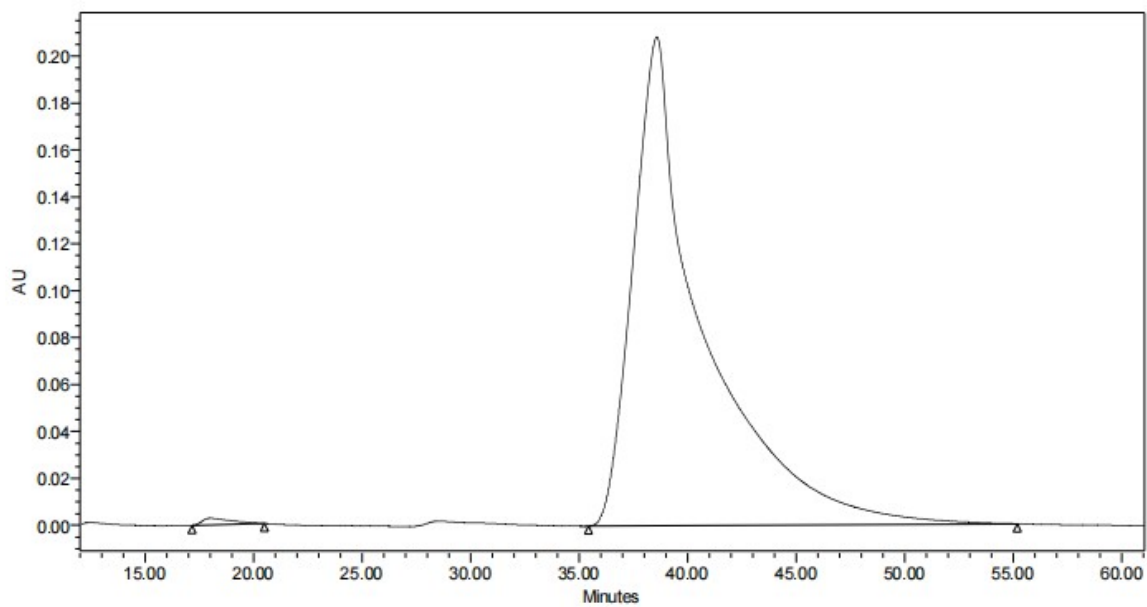

|   | RT    | Area     | % Area | Height |
|---|-------|----------|--------|--------|
| 1 | 17.99 | 270127   | 0.57   | 2898   |
| 2 | 38.59 | 46826897 | 99.43  | 208261 |

### racemic-5a

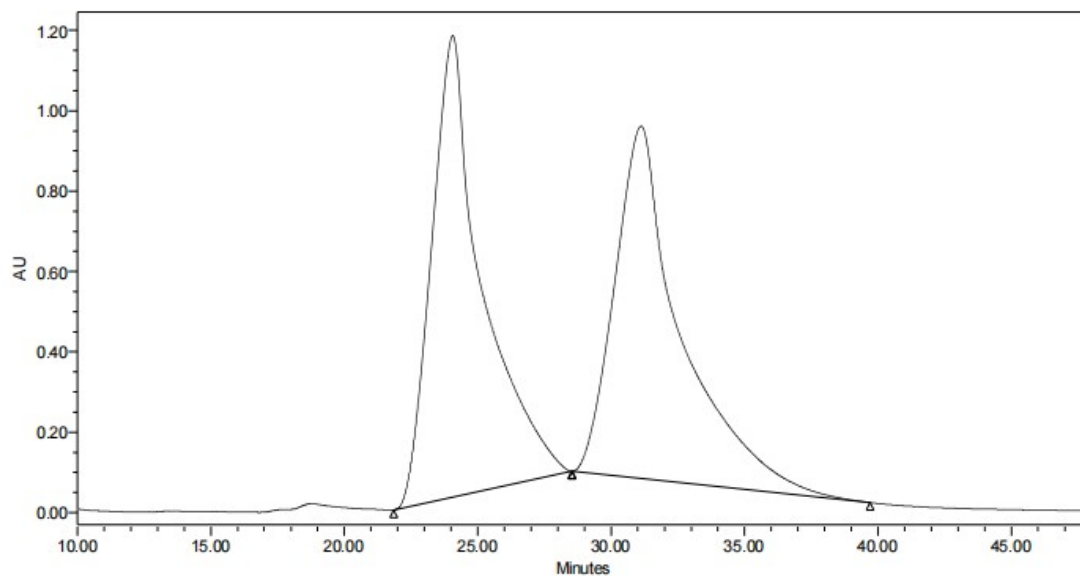

|   | RT    | Area      | % Area | Height  |
|---|-------|-----------|--------|---------|
| 1 | 24.06 | 152162412 | 50.23  | 1148078 |
| 2 | 31.13 | 150791344 | 49.77  | 877652  |

### chiral-5a

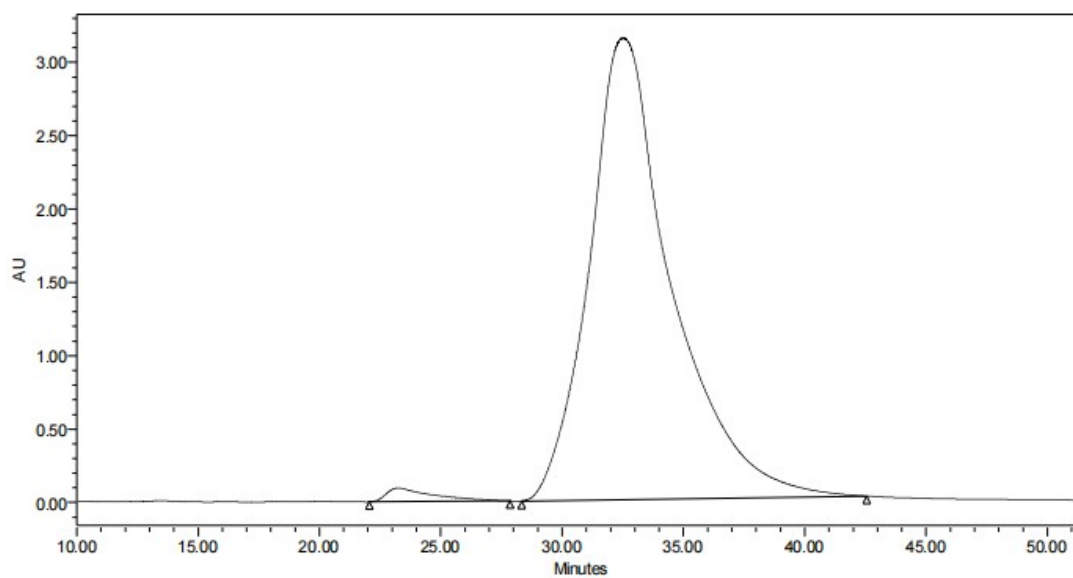

|   | RT    | Area      | % Area | Height  |
|---|-------|-----------|--------|---------|
| 1 | 23.24 | 12522523  | 1.66   | 93452   |
| 2 | 32.50 | 741764328 | 98.34  | 3150069 |



## VIII. Single Crystal X-Ray Diffraction of 4g

**Table 1. Crystal data and structure refinement for 4g.**

**CCDC 2245007**

|                                             |                                                                 |
|---------------------------------------------|-----------------------------------------------------------------|
| Identification code                         | 4g                                                              |
| Empirical formula                           | C <sub>24</sub> H <sub>18</sub> BrN <sub>3</sub> O <sub>3</sub> |
| Formula weight                              | 476.32                                                          |
| Temperature/K                               | 220.00(10)                                                      |
| Crystal system                              | orthorhombic                                                    |
| Space group                                 | P2 <sub>1</sub> 2 <sub>1</sub> 2 <sub>1</sub>                   |
| a/Å                                         | 10.11185(14)                                                    |
| b/Å                                         | 13.81714(17)                                                    |
| c/Å                                         | 15.0875(2)                                                      |
| α/°                                         | 90                                                              |
| β/°                                         | 90                                                              |
| γ/°                                         | 90                                                              |
| Volume/Å <sup>3</sup>                       | 2107.98(5)                                                      |
| Z                                           | 4                                                               |
| ρ <sub>calc</sub> /cm <sup>3</sup>          | 1.501                                                           |
| μ/mm <sup>-1</sup>                          | 2.922                                                           |
| F(000)                                      | 968.0                                                           |
| Crystal size/mm <sup>3</sup>                | 0.15 × 0.13 × 0.1                                               |
| Radiation                                   | Cu Kα (λ = 1.54184)                                             |
| 2θ range for data collection/°              | 8.678 to 147.5                                                  |
| Index ranges                                | -12 ≤ h ≤ 12, -17 ≤ k ≤ 15, -13 ≤ l ≤ 18                        |
| Reflections collected                       | 11365                                                           |
| Independent reflections                     | 4198 [R <sub>int</sub> = 0.0294, R <sub>sigma</sub> = 0.0304]   |
| Data/restraints/parameters                  | 4198/0/281                                                      |
| Goodness-of-fit on F <sup>2</sup>           | 1.037                                                           |
| Final R indexes [I >= 2σ (I)]               | R <sub>1</sub> = 0.0281, wR <sub>2</sub> = 0.0694               |
| Final R indexes [all data]                  | R <sub>1</sub> = 0.0304, wR <sub>2</sub> = 0.0707               |
| Largest diff. peak/hole / e Å <sup>-3</sup> | 0.16/-0.58                                                      |
| Flack/Hooft parameter                       | -0.019(7)/-0.005(7)                                             |
